# Supplementary material
Source: PubMed Central journal article supplement (PMC8173538)

# Convergent Palladium Catalyzed Stereospecific Arginine Glycosylation Using Glycals

Jun Yang, Yuanwei Dai, Ryan Bartlett, Qiang Zhang\*

*Department of Chemistry, University at Albany, State University of New York*

*1400 Washington Avenue, Albany, NY 12222 (USA)*

*\*E-mail: qzhang5@albany.edu*

## Contents:

|                                                         |     |
|---------------------------------------------------------|-----|
| 1. General information.....                             | S2  |
| 2. Experiment procedure and characterization.....       | S3  |
| 3. References.....                                      | S28 |
| 4. <sup>1</sup> H and <sup>13</sup> C NMR spectra ..... | S30 |
| 5. 2D NMR spectra for compound 3a.....                  | S76 |
| 6. 2D NMR spectra for compound 6.....                   | S78 |
| 7. HPLC spectra for compound 6.....                     | S81 |

## 1 General Information

Air- and moisture-sensitive reactions were carried out in oven-dried glassware sealed with rubber septa under a positive pressure of nitrogen. Reactions were stirred using Teflon coated magnetic stir bars. Organic solutions were concentrated using a rotary evaporator with a desktop vacuum pump. All reagents were purchased from Sigma-Aldrich, Tokyo Chemical Industry, Acros, Alfa Aesar, Chemimpex, and Oakwood Chemicals which were used without further purification. The catalyst  $\text{Pd}(\text{PPh}_3)_4$  was purchased from Strem and  $\text{Pd}_2(\text{dba})_3 \cdot \text{CHCl}_3$  from Ark Pharm, Inc. All reactions were carried out in oven-dried glassware under an atmosphere of nitrogen gas with anhydrous solvents unless otherwise noted. Analytical TLC was performed with 0.25 mm silica gel G plates with a 254 nm fluorescent indicator. The TLC plates were visualized by ultraviolet light and treatment with iodine/silica-gel followed by water washing. Purification of products was accomplished by flash chromatography on silica gel, and the purified compounds showed a single spot by analytical TLC if not special instructions. NMR spectra were recorded at 500 MHz for  $^1\text{H}$  and 125 MHz for  $^{13}\text{C}$  using  $\text{CDCl}_3$  ( $^1\text{H}$ , 7.26 ppm;  $^{13}\text{C}$ , 77.16 ppm),  $\text{CD}_3\text{OD}$  ( $^1\text{H}$ , 3.31 ppm;  $^{13}\text{C}$ , 49.00 ppm) and  $\text{DMSO}-d_6$  ( $^1\text{H}$ , 2.50 ppm;  $^{13}\text{C}$ , 39.52 ppm) as internal standard. The following abbreviations were used to explain the multiplicities: s = singlet, brs = broad singlet, d = doublet, t = triplet, q = quartet, dd = doublet of doublets, ddd = doublet of doublet of doublets, m = multiplet, coupling constant (Hz), and integration. High-resolution mass spectra were obtained at the University at Albany-SUNY Core Facility Center using an Agilent 6530B Q-TOF mass spectrometer. Optical rotations were obtained by a PerkinElmer 243 B polarimeter with a sodium lamp and are reported as follows:  $[\alpha]_D^{25}$  °C (c = g/100 mL solvent).

### Abbreviations:

|                                                                               |                                             |                                         |
|-------------------------------------------------------------------------------|---------------------------------------------|-----------------------------------------|
| Bn = benzyl                                                                   | Boc = <i>tert</i> -butoxycarbonyl           | Bz = benzoyl                            |
| DCM = dichloromethane                                                         | DCC = <i>N,N'</i> -dicyclohexylcarbodiimide | EA = ethyl acetate                      |
| DIPEA = <i>N,N</i> -Diisopropylethylamine                                     | dba = dibenzylideneacetone                  | TBS = <i>tert</i> -butyldimethylsilyl   |
| Fmoc = fluorenylmethoxycarbonyl                                               | HOBt = hydroxybenzotriazole                 | TBDPS = <i>tert</i> -butyldiphenylsilyl |
| NMO = <i>N</i> -Methylmorpholine <i>N</i> -oxide                              | Ts = 4-toluenesulfonyl                      | TIPS = triisopropylsilyl                |
| Pbf = 2,2,4,6,7-pentamethyldihydrobenzofuran-5-sulfonyl                       |                                             | TFA = trifluoroacetic acid              |
| Xantphos = (9,9-dimethyl-9 <i>H</i> -xanthene-4,5-diyl)bis(diphenylphosphane) |                                             | Mp = melting point                      |

## 2 Experimental Procedures

### 2.1 Substrate syntheses

#### Substrate (2c)

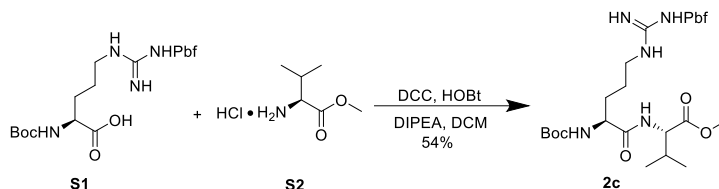

To a solution of **S1** (526.9 mg, 1.0 mmol), **S2** (167.5 mg, 1.0 mmol), HOBT (162.2 mg, 1.2 mmol) and DCC (248.0 mg, 1.2 mmol) in DCM (50 mL) was added DIPEA (0.2 mL, 1.2 mmol). The reaction mixture was stirred for 6 h at ambient temperature. Remove DCM via rotary evaporator, add EA (100 mL), then filter the white precipitate. The filtrate was washed sequentially with saturated sodium carbonate solution, water and brine, then dried over anhydrous sodium sulphate, filtered, concentrated and purified by column chromatography (Hexane/EA 1:1 then 1:1.5) to give **2c** (347.9 mg, 54% yield) as a white solid.

**2c**: Mp = 95–97 °C. TLC R<sub>f</sub> (Hexane/EA 1:3) = 0.23. <sup>1</sup>H NMR (500 MHz, CDCl<sub>3</sub>): δ 7.06 (s, 1H), 6.28 (s, 2H), 6.14 (brs, 1H), 5.57 (s, 1H), 4.41 (dd, *J* = 8.0, 5.5 Hz, 1H), 4.18 (s, 1H), 3.70 (s, 3H), 3.22 (s, 2H), 2.94 (s, 2H), 2.57 (s, 3H), 2.50 (s, 3H), 2.20–2.10 (m, 1H), 2.08 (s, 3H), 1.90–1.80 (m, 1H), 1.72–1.63 (m, 1H), 1.62–1.55 (m, 1H), 1.45 (s, 6H), 1.41 (s, 9H), 0.90 (d, *J* = 8.0 Hz, 3H), 0.89 (d, *J* = 8.0 Hz, 3H). <sup>13</sup>C NMR (125 MHz, CDCl<sub>3</sub>): δ 172.7, 172.6, 158.9, 156.4, 156.1, 138.5, 133.0, 132.4, 124.7, 117.6, 86.5, 80.2, 57.8, 54.0, 52.3, 43.4, 40.8, 30.8, 29.7, 28.7, 28.4, 25.4, 19.4, 19.1, 18.1, 12.6. HRMS (ESI) *m/z*: [M + H]<sup>+</sup> Calcd for C<sub>30</sub>H<sub>50</sub>N<sub>5</sub>O<sub>8</sub>S 640.3375; Found 640.3370. [ $\alpha$ ]<sub>D</sub><sup>20</sup>: –9.5° (*c* 0.4, CH<sub>3</sub>OH).

#### Substrate (2d)

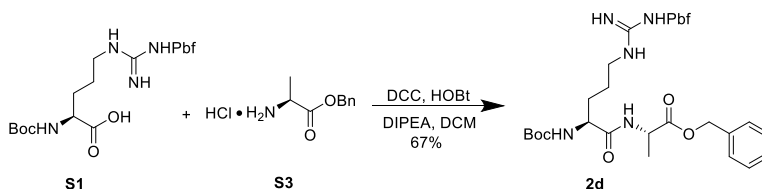

To a solution of **S1** (526.4 mg, 1.0 mmol), **S3** (215.1 mg, 1.0 mmol), HOBT (162.1 mg, 1.2 mmol) and DCC (247.9 mg, 1.2 mmol) in DCM (50 mL) was added DIPEA (0.2 mL, 1.2 mmol). The reaction mixture was stirred for 6 h at ambient temperature. Remove DCM via rotary evaporator, add EA (100 mL), then filter the white precipitate. The filtrate was washed sequentially with saturated sodium carbonate solution, water and brine, then dried over anhydrous sodium sulphate, filtered,

concentrated and purified by column chromatography (Hexane/EA 1:1, 1:1.5 then 1:2) to give **2d** (460.6 mg, 67% yield) as a white solid.

**2d**: Mp = 80–83 °C. TLC  $R_f$  (Hexane/EA 1:3) = 0.25.  $^1\text{H}$  NMR (500 MHz,  $\text{CDCl}_3$ ):  $\delta$  7.45 (s, 1H), 7.39–7.27 (s, 5H), 6.27 (s, 2H), 6.11 (brs, 1H), 5.55 (brs, 1H), 5.15 (d,  $J$  = 12.3 Hz, 1H), 5.08 (d,  $J$  = 12.3 Hz, 1H), 4.60–4.47 (m, 1H), 4.29 (s, 1H), 3.19 (s, 2H), 2.94 (s, 2H), 2.57 (s, 3H), 2.51 (s, 3H), 2.08 (s, 3H), 1.88–1.77 (m, 1H), 1.66–1.54 (m, 3H), 1.45 (s, 6H), 1.40 (s, 12H).  $^{13}\text{C}$  NMR (125 MHz,  $\text{CDCl}_3$ ):  $\delta$  173.1, 172.5, 158.9, 156.5, 156.1, 138.6, 135.5, 132.8, 132.5, 128.7, 128.5, 128.2, 124.8, 117.7, 86.5, 80.0, 67.2, 53.5, 48.5, 43.4, 40.6, 30.6, 28.7, 28.5, 25.3, 19.5, 18.1, 17.4, 12.6. HRMS (ESI)  $m/z$ :  $[\text{M} + \text{H}]^+$  Calcd for  $\text{C}_{34}\text{H}_{50}\text{N}_5\text{O}_8\text{S}$  688.3375; Found 688.3368.  $[\alpha]_{\text{D}}^{20}$ :  $-14.8^\circ$  ( $c$  0.21,  $\text{CH}_3\text{OH}$ ).

### Substrate (2e)

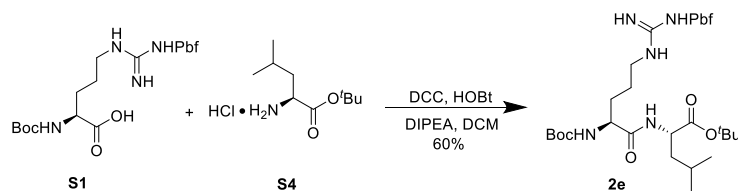

To a solution of **S1** (525.9 mg, 1.0 mmol), **S4** (223.6 mg, 1.0 mmol), HOBT (162.4 mg, 1.2 mmol) and DCC (248.6 mg, 1.2 mmol) in DCM (50 mL) was added DIPEA (0.2 mL, 1.2 mmol). The reaction mixture was stirred for 6 h at ambient temperature. Remove DCM via rotary evaporator, add EA (100 mL), then filter the white precipitate. The filtrate was washed sequentially with saturated sodium carbonate solution, water and brine, then dried over anhydrous sodium sulphate, filtered, concentrated and purified by column chromatography (Hexane/EA 1:1 then 1:2) to give **2e** (416.3 mg, 60% yield) as a white solid.

**2e**: Mp = 89–92 °C. TLC  $R_f$  (Hexane/EA 1:3) = 0.49.  $^1\text{H}$  NMR (500 MHz,  $\text{CDCl}_3$ ):  $\delta$  6.99 (s, 1H), 6.28 (s, 2H), 6.13 (brs, 1H), 5.48 (s, 1H), 4.37 (dd,  $J$  = 7.0, 6.5 Hz, 1H), 4.21 (s, 1H), 3.24 (s, 2H), 2.95 (s, 2H), 2.57 (s, 3H), 2.51 (s, 3H), 2.08 (s, 3H), 1.94–1.82 (m, 1H), 1.74–1.50 (m, 6H), 1.45 (s, 6H), 1.42 (s, 9H), 1.40 (s, 9H), 0.88 (s, 3H), 0.87 (s, 3H).  $^{13}\text{C}$  NMR (125 MHz,  $\text{CDCl}_3$ ):  $\delta$  172.4, 172.3, 158.9, 156.4, 156.0, 138.5, 133.1, 132.4, 124.7, 117.6, 86.5, 82.0, 80.0, 53.5, 51.8, 43.4, 40.9, 34.0, 30.3, 28.7, 28.5, 28.1, 25.7, 25.1, 24.9, 22.9, 21.9, 19.4, 18.1, 12.6. HRMS (ESI)  $m/z$ :  $[\text{M} + \text{H}]^+$  Calcd for  $\text{C}_{34}\text{H}_{58}\text{N}_5\text{O}_8\text{S}$  696.4001; Found 696.3992.  $[\alpha]_{\text{D}}^{20}$ :  $-15.6^\circ$  ( $c$  0.4,  $\text{CH}_3\text{OH}$ ).

### Substrate (2f)

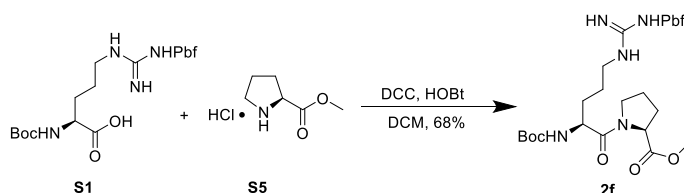

To a solution of **S1** (525.9 mg, 1.0 mmol), **S5** (163.2 mg, 1.0 mmol), HOBt (162.8 mg, 1.2 mmol) and DCC (248.6 mg, 1.2 mmol) in DCM (50 mL) was added DIPEA (0.2 mL, 1.2 mmol). The reaction mixture was stirred for 6 h at ambient temperature. Remove DCM via rotary evaporator, add EA (100 mL), then filter the white precipitate. The filtrate was washed sequentially with saturated sodium carbonate solution, water and brine, then dried over anhydrous sodium sulphate, filtered, concentrated and purified by column chromatography (Hexane/EA 1:1, 1:3, 1:4 then 1:5) to give **2f** (430.6 mg, 68% yield) as a white solid.

**2f**: Mp = 98–101 °C. TLC  $R_f$  (DCM/MeOH 8:1) = 0.60.  $^1\text{H}$  NMR (500 MHz,  $\text{CDCl}_3$ ):  $\delta$  6.14 (s, 2H), 6.01 (brs, 1H), 5.52 (d,  $J$  = 8.0 Hz, 1H), 4.50 (dd,  $J$  = 8.5, 4.5 Hz, 1H), 4.48–4.39 (m, 1H), 3.70 (s, 3H), 3.69–3.65 (m, 1H), 3.62–3.53 (m, 1H), 3.33–3.13 (m, 2H), 2.94 (s, 2H), 2.59 (s, 3H), 2.51 (s, 3H), 2.26–2.17 (m, 1H), 2.08 (s, 3H), 2.06–1.93 (m, 3H), 1.89–1.78 (m, 2H), 1.67–1.58 (m, 2H), 1.45 (s, 6H), 1.40 (s, 9H).  $^{13}\text{C}$  NMR (125 MHz,  $\text{CDCl}_3$ ):  $\delta$  173.2, 171.0, 158.7, 156.3, 156.0, 138.5, 133.3, 132.4, 124.6, 117.5, 86.4, 80.2, 59.0, 52.7, 51.3, 47.2, 43.4, 40.9, 29.7, 29.1, 28.7, 28.5, 25.1, 24.1, 22.4, 19.4, 18.0, 12.6. HRMS (ESI)  $m/z$ :  $[\text{M} + \text{H}]^+$  Calcd for  $\text{C}_{30}\text{H}_{48}\text{N}_5\text{O}_8\text{S}$  638.3218; Found 638.3210.  $[\alpha]_{\text{D}}^{20}$ :  $-31.8^\circ$  (c 0.22,  $\text{CH}_3\text{OH}$ ).

### Substrate (2g)

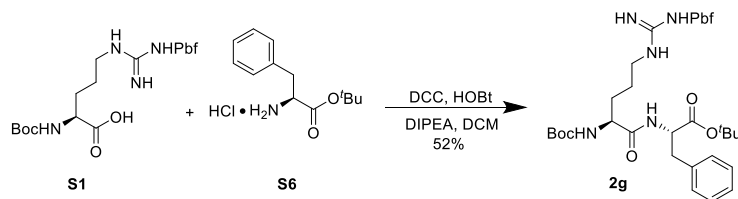

To a solution of **S1** (264.5 mg, 0.5 mmol), **S6** (128.1 mg, 0.5 mmol), HOBt (80.9 mg, 0.6 mmol) and DCC (123.4 mg, 0.6 mmol) in DCM (25 mL) was added DIPEA (0.1 mL, 0.6 mmol). The reaction mixture was stirred for 6 h at ambient temperature. Remove DCM via rotary evaporator, add EA (100 mL), then filter the white precipitate. The filtrate was washed sequentially with saturated sodium carbonate solution, water and brine, then dried over anhydrous sodium sulphate, filtered, concentrated and purified by column chromatography (Hexanes/EA 1:1, 1:1.2 then 1:1.5) to give **2g** (188.7 mg, 52% yield) as a white solid.

**2g**: Mp = 89–92 °C. TLC  $R_f$  (Hexane/EA 1:2) = 0.29.  $^1\text{H}$  NMR (500 MHz,  $\text{CDCl}_3$ ):  $\delta$  7.23 (dd,  $J$  = 7.0 Hz, 2H), 7.19 (d,  $J$  = 6.5 Hz, 1H), 7.13 (d,  $J$  = 7.5 Hz, 2H), 6.97 (brs, 1H), 6.23 (s, 2H), 6.12 (brs, 1H), 5.42 (s, 1H), 4.64 (dd,  $J$  = 13.5, 6.5 Hz, 1H), 4.12 (s, 1H), 3.20 (s, 2H), 3.10–2.98 (m, 2H), 2.94 (s, 2H), 2.58 (s, 3H), 2.51 (s, 3H), 2.08 (s, 3H), 1.86–1.74 (m, 1H), 1.67–1.49 (m, 3H), 1.45 (s, 6H), 1.40 (s, 9H), 1.36 (s, 9H), 0.88 (s, 3H), 0.87 (s, 3H).  $^{13}\text{C}$  NMR (125 MHz,  $\text{CDCl}_3$ ):  $\delta$  172.0, 170.9, 158.9, 156.4, 155.9, 138.5, 136.4, 133.1, 132.5, 129.5, 128.5, 127.0, 124.7, 117.6, 86.5, 82.5, 80.2, 54.1, 53.9, 43.4,

40.8, 37.9, 30.2, 28.7, 28.4, 28.0, 25.2, 19.4, 18.1, 12.6. HRMS (ESI)  $m/z$ :  $[M + H]^+$  Calcd for  $C_{37}H_{56}N_5O_8S$  730.3844; Found 730.3842.  $[\alpha]_D^{20}$ :  $-4.7^\circ$  ( $c$  0.87,  $CH_3OH$ ).

### Substrate (2h)

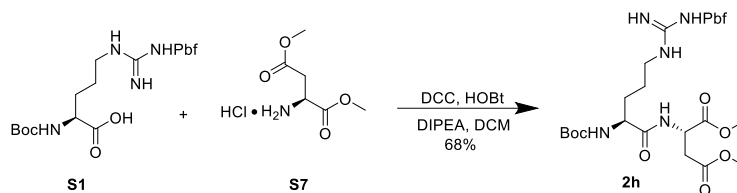

To a solution of **S1** (263.0 mg, 0.5 mmol), **S7** (99.4 mg, 0.5 mmol), HOBT (81.0 mg, 0.6 mmol) and DCC (124.7 mg, 0.6 mmol) in DCM (25 mL) was added DIPEA (0.1 mL, 0.6 mmol). The reaction mixture was stirred for 6 h at ambient temperature. Remove DCM via rotary evaporator, add EA (100 mL), then filter the white precipitate. The filtrate was washed sequentially with saturated sodium carbonate solution, water and brine, then dried over anhydrous sodium sulphate, filtered, concentrated and purified by column chromatography (Hexanes/EA 1:1.5, 1:2 then 1:3) to give **2h** (226.5 mg, 68% yield) as a white solid.

**2h**: Mp = 78–80 °C. TLC  $R_f$  (Hexane/EA 1:3) = 0.14.  $^1H$  NMR (500 MHz,  $CDCl_3$ ):  $\delta$  7.41 (s, 1H), 6.28 (s, 2H), 6.11 (brs, 1H), 5.52 (s, 1H), 4.85 (s, 1H), 4.22 (s, 1H), 3.71 (s, 3H), 3.66 (s, 3H), 3.38-3.14 (m, 2H), 3.02-2.90 (m, 1H), 2.95 (s, 2H), 2.86 (d,  $J$  = 16.5 Hz, 1H), 2.57 (s, 3H), 2.51 (s, 3H), 2.08 (s, 3H), 1.93-1.79 (m, 1H), 1.72-1.55 (m, 3H), 1.45 (s, 6H), 1.40 (s, 9H).  $^{13}C$  NMR (125 MHz,  $CDCl_3$ ):  $\delta$  172.4, 171.4, 158.9, 156.5, 155.9, 138.5, 133.0, 132.4, 124.7, 117.6, 86.5, 80.1, 53.8, 53.0, 52.3, 48.8, 43.4, 40.6, 35.9, 30.2, 28.7, 28.4, 25.2, 19.4, 18.1, 12.6. HRMS (ESI)  $m/z$ :  $[M + H]^+$  Calcd for  $C_{30}H_{48}N_5O_{10}S$  670.3116; Found 670.3105.  $[\alpha]_D^{20}$ :  $-4.4^\circ$  ( $c$  0.34,  $CH_3OH$ ).

### Substrate (2i)

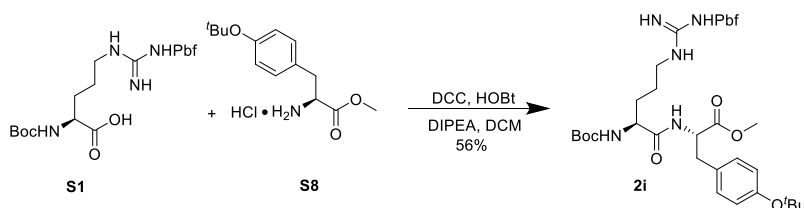

To a solution of **S1** (262.9 mg, 0.5 mmol), **S8** (143.8 mg, 0.5 mmol), HOBT (81.8 mg, 0.6 mmol) and DCC (124.9 mg, 0.6 mmol) in DCM (25 mL) was added DIPEA (0.1 mL, 0.6 mmol). The reaction mixture was stirred for 6 h at ambient temperature. Remove DCM via rotary evaporator, add EA (100 mL), then filter the white precipitate. The filtrate was washed sequentially with saturated sodium carbonate solution, water and brine, then dried over anhydrous sodium sulphate, filtered,

concentrated and purified by column chromatography (Hexanes/EA 1:1.5, 1:2 then 1:3) to give **2i** (211.5 mg, 56% yield) as a white solid.

**2i**: Mp = 98–99 °C. TLC  $R_f$  (Hexane/EA 1:2) = 0.19.  $^1\text{H}$  NMR (500 MHz,  $\text{CDCl}_3$ ):  $\delta$  7.22–7.06 (m, 1H), 7.02 (d,  $J$  = 7.5 Hz, 2H), 6.86 (dd,  $J$  = 8.5, 2.0 Hz, 2H), 6.28 (s, 2H), 5.54–5.32 (m, 1H), 4.71 (s, 1H), 4.16 (s, 1H), 3.63 (d,  $J$  = 5.0 Hz, 3H), 3.19 (s, 2H), 3.11–3.02 (m, 1H), 3.02–2.96 (m, 1H), 2.94 (s, 2H), 2.58 (s, 3H), 2.51 (s, 3H), 2.08 (s, 3H), 1.83–1.69 (m, 1H), 1.66–1.54 (m, 1H), 1.55–1.47 (m, 2H), 1.45 (s, 6H), 1.40 (s, 9H), 1.30 (s, 9H).  $^{13}\text{C}$  NMR (125 MHz,  $\text{CDCl}_3$ ):  $\delta$  172.4, 158.9, 156.40, 156.35, 155.9, 154.3, 138.5, 133.0, 132.5, 131.3, 129.8, 124.7, 124.3, 117.6, 86.5, 80.2, 78.7, 53.9, 52.41, 52.39, 43.4, 40.7, 37.1, 30.2, 29.0, 28.7, 28.4, 25.2, 19.4, 18.1, 12.6. HRMS (ESI)  $m/z$ :  $[\text{M} + \text{H}]^+$  Calcd for  $\text{C}_{38}\text{H}_{58}\text{N}_5\text{O}_9\text{S}$  760.3950; Found 760.3941.  $[\alpha]_{\text{D}}^{20}$ :  $-3.1^\circ$  ( $c$  0.23,  $\text{CH}_3\text{OH}$ ).

### Substrate (2j)

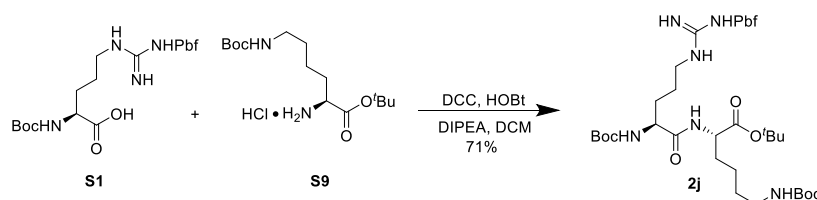

To a solution of **S1** (265.0 mg, 0.5 mmol), **S9** (169.7 mg, 0.5 mmol), HOBT (81.6 mg, 0.6 mmol) and DCC (124.0 mg, 0.6 mmol) in DCM (25 mL) was added DIPEA (0.1 mL, 0.6 mmol). The reaction mixture was stirred for 6 h at ambient temperature. Remove DCM via rotary evaporator, add EA (100 mL), then filter the white precipitate. The filtrate was washed sequentially with saturated sodium carbonate solution, water and brine, then dried over anhydrous sodium sulphate, filtered, concentrated and purified by column chromatography (Hexanes/EA 1:1.5, then 1:2) to give **2j** (288.2 mg, 71% yield) as a white solid.

**2j**: Mp = 92–94 °C. TLC  $R_f$  (Hexane/EA 1:3) = 0.43.  $^1\text{H}$  NMR (500 MHz,  $\text{CDCl}_3$ ):  $\delta$  7.12 (s, 1H), 6.29 (s, 2H), 6.09 (brs, 1H), 5.51 (s, 1H), 4.80 (s, 1H), 4.36 (s, 1H), 4.21 (s, 1H), 3.39–3.14 (m, 2H), 3.05 (d,  $J$  = 6.0 Hz, 2H), 2.95 (s, 2H), 2.58 (s, 3H), 2.51 (s, 3H), 2.09 (s, 3H), 1.92–1.76 (m, 2H), 1.74–1.62 (m, 2H), 1.63–1.52 (m, 2H), 1.50–1.45 (m, 1H), 1.45 (s, 6H), 1.43 (s, 9H), 1.41 (s, 18H), 1.36–1.27 (m, 3H).  $^{13}\text{C}$  NMR (125 MHz,  $\text{CDCl}_3$ ):  $\delta$  172.3, 171.7, 158.8, 156.43, 156.37, 156.0, 138.5, 133.1, 132.5, 124.7, 117.6, 86.5, 82.2, 80.1, 79.3, 53.8, 53.1, 43.4, 40.7, 40.3, 31.5, 30.3, 29.6, 28.7, 28.6, 28.5, 28.1, 25.3, 22.7, 19.5, 18.1, 12.6. HRMS (ESI)  $m/z$ :  $[\text{M} + \text{H}]^+$  Calcd for  $\text{C}_{39}\text{H}_{67}\text{N}_6\text{O}_{10}\text{S}$  811.4634; Found 811.4627.  $[\alpha]_{\text{D}}^{20}$ :  $-4.8^\circ$  ( $c$  0.31,  $\text{CH}_3\text{OH}$ ).

### Substrate (2k)

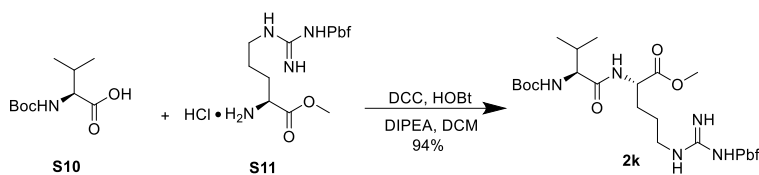

To a solution of **S10** (108.5 mg, 0.5 mmol), **S11** (239.0 mg, 0.5 mmol), HOBT (82.1 mg, 0.6 mmol) and DCC (125.8 mg, 0.6 mmol) in DCM (25 mL) was added DIPEA (0.1 mL, 0.6 mmol). The reaction mixture was stirred for 6 h at ambient temperature. Remove DCM via rotary evaporator, add EA (100 mL), then filter the white precipitate. The filtrate was washed sequentially with saturated sodium carbonate solution, water and brine, then dried over anhydrous sodium sulphate, filtered, concentrated and purified by column chromatography (Hexanes/EA 1:1, 1:1.5 then 1:2) to give **2k** (301.1 mg, 94% yield) as a white solid.

**2k**: Mp = 80–83 °C. TLC  $R_f$  (Hexane/EA 1:3) = 0.40.  $^1\text{H}$  NMR (500 MHz,  $\text{CDCl}_3$ ):  $\delta$  7.22 (s, 1H), 6.31 (s, 2H), 6.14 (brs, 1H), 5.41 (brs, 1H), 4.44 (s, 1H), 4.13–3.95 (m, 1H), 3.70 (s, 3H), 3.20 (s, 2H), 2.94 (s, 2H), 2.57 (s, 3H), 2.50 (s, 3H), 2.13–2.04 (m, 1H), 2.08 (s, 3H), 1.91–1.79 (m, 1H), 1.78–1.68 (m, 1H), 1.64–1.49 (m, 2H), 1.45 (s, 6H), 1.39 (s, 9H), 0.93 (d,  $J$  = 7.0 Hz, 3H), 0.90 (d,  $J$  = 7.0 Hz, 3H).  $^{13}\text{C}$  NMR (125 MHz,  $\text{CDCl}_3$ ):  $\delta$  172.7, 172.4, 158.8, 156.5, 156.4, 138.5, 133.1, 132.4, 124.7, 117.6, 86.5, 80.1, 59.8, 52.5, 52.3, 43.4, 40.7, 31.2, 29.4, 28.7, 28.5, 25.4, 19.4, 19.2, 18.1, 17.8, 12.6. HRMS (ESI)  $m/z$ :  $[\text{M} + \text{H}]^+$  Calcd for  $\text{C}_{30}\text{H}_{50}\text{N}_5\text{O}_8\text{S}$  640.3375; Found 640.3374.  $[\alpha]_{\text{D}}^{20}$ :  $-16.5^\circ$  ( $c$  0.41,  $\text{CH}_3\text{OH}$ ).

### Substrate (2l)

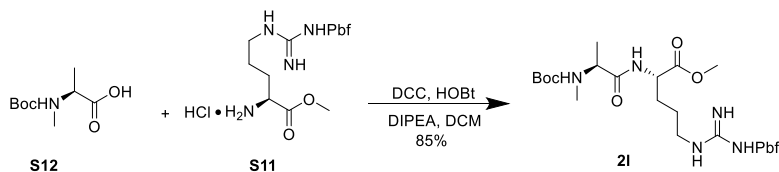

To a solution of **S12** (103.4 mg, 0.5 mmol), **S11** (238.8 mg, 0.5 mmol), HOBT (81.6 mg, 0.6 mmol) and DCC (122.4 mg, 0.59 mmol) in DCM (25 mL) was added DIPEA (0.1 mL, 0.6 mmol). The reaction mixture was stirred for 6 h at ambient temperature. Remove DCM via rotary evaporator, add EA (100 mL), then filter the white precipitate. The filtrate was washed sequentially with saturated sodium carbonate solution, water and brine, then dried over anhydrous sodium sulphate, filtered, concentrated and purified by column chromatography (Hexanes/EA 1:1.5, 1:2 then 1:3) to give **2l** (266.6 mg, 85% yield) as a white solid.

**2l**: Mp = 72–74 °C. TLC  $R_f$  (Hexane/EA 1:3) = 0.18.  $^1\text{H}$  NMR (500 MHz,  $\text{CDCl}_3$ ):  $\delta$  6.84 (brs, 1H), 6.21 (s, 2H), 6.16 (brs, 1H), 4.59 (q,  $J$  = 7.0 Hz, 1H), 4.51 (s, 1H), 3.72 (s, 3H), 3.40–3.10 (m, 2H), 2.95 (s, 2H), 2.80 (s, 3H), 2.56 (s, 3H), 2.50 (s, 3H), 2.09 (s, 3H), 1.92–1.82 (m, 1H), 1.71–1.61 (m, 1H), 1.58–1.49 (m, 2H), 1.45 (s, 15H), 1.35 (d,  $J$  = 7.0 Hz, 3H).  $^{13}\text{C}$

NMR (125 MHz, CDCl<sub>3</sub>):  $\delta$  172.6, 172.4, 158.8, 156.2, 138.5, 133.2, 132.4, 124.7, 117.6, 86.5, 81.0, 52.7, 51.6, 43.4, 40.7, 30.3, 28.7, 28.5, 25.2, 19.4, 18.0, 14.2, 12.6. HRMS (ESI)  $m/z$ :  $[M + H]^+$  Calcd for C<sub>29</sub>H<sub>48</sub>N<sub>5</sub>O<sub>8</sub>S 626.3218; Found 626.3222.  $[\alpha]_D^{20}$ :  $-18.9^\circ$  ( $c$  0.41, CH<sub>3</sub>OH).

### Substrate (2m)

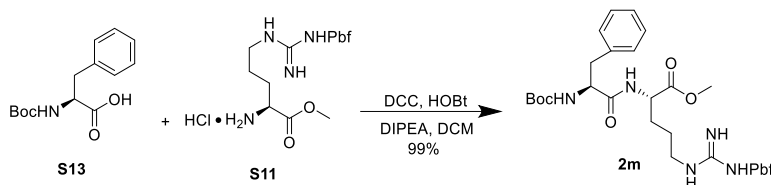

To a solution of **S13** (133.5 mg, 0.5 mmol), **S11** (237.4 mg, 0.5 mmol), HOBT (80.9 mg, 0.6 mmol) and DCC (122.8 mg, 0.6 mmol) in DCM (25 mL) was added DIPEA (0.1 mL, 0.6 mmol). The reaction mixture was stirred for 6 h at ambient temperature. Remove DCM via rotary evaporator, add EA (100 mL), then filter the white precipitate. The filtrate was washed sequentially with saturated sodium carbonate solution, water and brine, then dried over anhydrous sodium sulphate, filtered, concentrated and purified by column chromatography (Hexanes/EA 1:1, 1:1.5 then 1:2) to give **2m** (340.0 mg, 99% yield) as a white solid.

**2m**: Mp = 88–92 °C. Mp = 80–83 °C. TLC  $R_f$  (Hexane/EA 1:3) = 0.32. <sup>1</sup>H NMR (500 MHz, CDCl<sub>3</sub>):  $\delta$  7.35 (brs, 1H), 7.24–7.11 (m, 5H), 6.32 (s, 1H), 6.29 (s, 1H), 6.14 (brs, 1H), 5.62–5.32 (m, 1H), 4.46 (s, 2H), 3.69 (s, 3H), 3.30–3.12 (m, 2H), 3.14 (dd,  $J$  = 15.0, 5.0 Hz, 1H), 2.94 (s, 2H), 2.88 (dd,  $J$  = 13.5, 10.0 Hz, 1H), 2.58 (s, 3H), 2.50 (s, 3H), 2.09 (s, 3H), 1.90–1.80 (m, 1H), 1.78–1.68 (m, 1H), 1.63–1.50 (m, 2H), 1.45 (s, 6H), 1.32 (s, 3H), 1.31 (s, 6H). <sup>13</sup>C NMR (125 MHz, CDCl<sub>3</sub>):  $\delta$  172.7, 172.2, 158.9, 156.4, 156.0, 138.5, 136.8, 133.1, 132.4, 129.5, 128.6, 126.9, 124.7, 117.6, 86.5, 80.2, 55.8, 52.6, 52.3, 43.4, 40.8, 38.6, 29.5, 28.7, 28.4, 25.3, 19.4, 18.1, 12.6. HRMS (ESI)  $m/z$ :  $[M + H]^+$  Calcd for C<sub>34</sub>H<sub>50</sub>N<sub>5</sub>O<sub>8</sub>S 688.3375; Found 688.3381.  $[\alpha]_D^{20}$ :  $-5.1^\circ$  ( $c$  0.39, CH<sub>3</sub>OH).

### Substrate (2n)

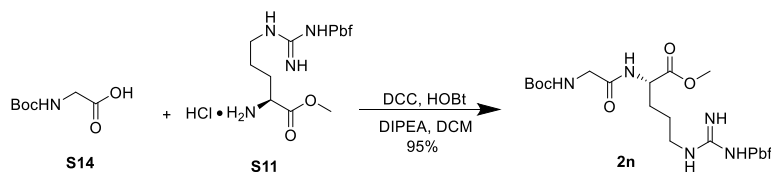

To a solution of **S14** (88.7 mg, 0.5 mmol), **S11** (238.3 mg, 0.5 mmol), HOBT (81.7 mg, 0.6 mmol) and DCC (123.6 mg, 0.6 mmol) in DCM (25 mL) was added DIPEA (0.1 mL, 0.6 mmol). The reaction mixture was stirred for 6 h at ambient temperature. Remove DCM via rotary evaporator, add EA (100 mL), then filter the white precipitate. The filtrate was washed sequentially with saturated sodium carbonate solution, water and brine, then dried over anhydrous sodium sulphate, filtered,

concentrated and purified by column chromatography (Hexanes/EA 1:2, 1:3 then EA) to give **2n** (282.3 mg, 95% yield) as a white solid.

**2n**: Mp = 88–91 °C. TLC  $R_f$  (EA) = 0.18.  $^1\text{H}$  NMR (500 MHz,  $\text{CDCl}_3$ ):  $\delta$  7.22 (s, 1H), 6.30 (s, 2H), 6.20 (brs, 1H), 5.64 (s, 1H), 4.52 (s, 1H), 3.87 (dd,  $J$  = 17.5, 4.5 Hz, 1H), 3.76 (dd,  $J$  = 17.5, 4.5 Hz, 1H), 3.70 (s, 3H), 3.19 (s, 2H), 2.95 (s, 2H), 2.56 (s, 3H), 2.49 (s, 3H), 2.08 (s, 3H), 1.92–1.82 (m, 1H), 1.78–1.66 (m, 1H), 1.62–1.48 (m, 2H), 1.45 (s, 6H), 1.41 (s, 9H).  $^{13}\text{C}$  NMR (125 MHz,  $\text{CDCl}_3$ ):  $\delta$  172.4, 170.3, 158.9, 156.6, 156.4, 138.4, 132.9, 132.4, 124.8, 117.7, 86.5, 80.4, 52.7, 52.1, 44.1, 43.4, 40.7, 29.5, 28.7, 28.4, 25.3, 19.4, 18.1, 12.6. HRMS (ESI)  $m/z$ :  $[\text{M} + \text{H}]^+$  Calcd for  $\text{C}_{27}\text{H}_{44}\text{N}_5\text{O}_8\text{S}$  598.2905; Found 598.2898.  $[\alpha]_{\text{D}}^{20}$ :  $-3.5^\circ$  ( $c$  0.23,  $\text{CH}_3\text{OH}$ ).

### Substrate (2o)

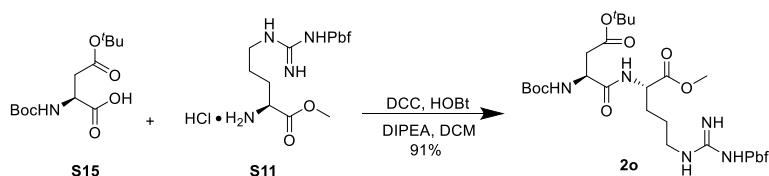

To a solution of **S15** (146.5 mg, 0.5 mmol), **S11** (238.3 mg, 0.5 mmol), HOBT (81.3 mg, 0.6 mmol) and DCC (124.7 mg, 0.6 mmol) in DCM (25 mL) was added DIPEA (0.1 mL, 0.6 mmol). The reaction mixture was stirred for 6 h at ambient temperature. Remove DCM via rotary evaporator, add EA (100 mL), then filter the white precipitate. The filtrate was washed sequentially with saturated sodium carbonate solution, water and brine, then dried over anhydrous sodium sulphate, filtered, concentrated and purified by column chromatography (Hexanes/EA 1:1, 1:2 then 1:3) to give **2o** (325.0 mg, 91% yield) as a white solid.

**2o**: Mp = 83–84 °C. TLC  $R_f$  (Hexane/EA 1:3) = 0.35.  $^1\text{H}$  NMR (500 MHz,  $\text{CDCl}_3$ ):  $\delta$  7.23 (d,  $J$  = 7.0 Hz, 1H), 6.18 (s, 2H), 6.12 (brs, 1H), 5.80 (s, 1H), 4.60–4.40 (m, 2H), 3.71 (s, 3H), 3.30–3.10 (m, 2H), 2.94 (s, 2H), 2.83 (dd,  $J$  = 13.5, 3.5 Hz, 1H), 2.64 (dd,  $J$  = 17.0, 6.0 Hz, 1H), 2.56 (s, 3H), 2.50 (s, 3H), 2.08 (s, 3H), 1.92–1.80 (m, 1H), 1.74–1.63 (m, 1H), 1.60–1.50 (m, 2H), 1.45 (s, 6H), 1.43 (s, 9H), 1.41 (s, 9H).  $^{13}\text{C}$  NMR (125 MHz,  $\text{CDCl}_3$ ):  $\delta$  172.1, 171.7, 171.1, 158.8, 156.2, 155.8, 138.5, 133.2, 132.4, 124.7, 117.5, 86.5, 82.1, 80.7, 52.7, 51.9, 51.0, 43.4, 40.8, 37.4, 30.2, 28.7, 28.4, 28.1, 24.9, 19.4, 18.0, 12.6. HRMS (ESI)  $m/z$ :  $[\text{M} + \text{H}]^+$  Calcd for  $\text{C}_{33}\text{H}_{54}\text{N}_5\text{O}_{10}\text{S}$  712.3586; Found 712.3578.  $[\alpha]_{\text{D}}^{20}$ :  $-8.4^\circ$  ( $c$  0.39,  $\text{CH}_3\text{OH}$ ).

### Substrate (2p)

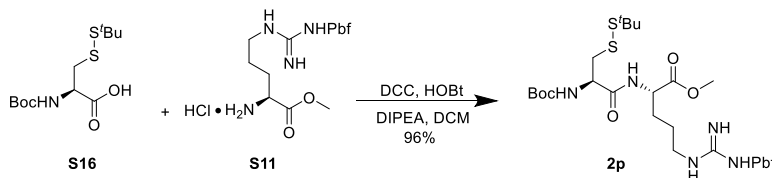

To a solution of **S16** (155.2 mg, 0.5 mmol), **S11** (239.0 mg, 0.5 mmol), HOBt (80.5 mg, 0.6 mmol) and DCC (123.9 mg, 0.6 mmol) in DCM (25 mL) was added DIPEA (0.1 mL, 0.6 mmol). The reaction mixture was stirred for 6 h at ambient temperature. Remove DCM via rotary evaporator, add EA (100 mL), then filter the white precipitate. The filtrate was washed sequentially with saturated sodium carbonate solution, water and brine, then dried over anhydrous sodium sulphate, filtered, concentrated and purified by column chromatography (Hexanes/EA 1:1, 1:1.2 then 1:1.5) to give **2p** (350.8 mg, 96% yield) as a white solid.

**2p**: Mp = 87–89 °C. TLC  $R_f$  (Hexane/EA 1:3) = 0.32.  $^1\text{H}$  NMR (500 MHz,  $\text{CDCl}_3$ ):  $\delta$  7.13 (s, 1H), 6.18 (s, 2H), 6.17 (brs, 1H), 5.57 (s, 1H), 4.55 (dd,  $J$  = 12.0, 7.5 Hz, 1H), 4.40 (dd,  $J$  = 13.5, 6.5 Hz, 1H), 3.74 (s, 3H), 3.32–3.14 (m, 2H), 3.09 (d,  $J$  = 5.5 Hz, 2H), 2.95 (s, 2H), 2.57 (s, 3H), 2.51 (s, 3H), 2.09 (s, 3H), 1.95–1.84 (m, 1H), 1.77–1.67 (m, 1H), 1.65–1.52 (m, 2H), 1.46 (s, 6H), 1.44 (s, 9H), 1.32 (s, 9H).  $^{13}\text{C}$  NMR (125 MHz,  $\text{CDCl}_3$ ):  $\delta$  172.2, 171.2, 158.8, 156.3, 155.9, 138.5, 133.1, 132.4, 124.7, 117.6, 86.5, 80.8, 54.6, 52.7, 52.0, 48.5, 43.4, 42.4, 40.8, 30.0, 28.7, 28.4, 25.2, 24.1, 19.4, 18.1, 12.6. HRMS (ESI)  $m/z$ :  $[\text{M} + \text{H}]^+$  Calcd for  $\text{C}_{32}\text{H}_{54}\text{N}_5\text{O}_8\text{S}_3$  732.3129; Found 732.3131.  $[\alpha]_{\text{D}}^{20}$ :  $-47.5^\circ$  ( $c$  0.32,  $\text{CH}_3\text{OH}$ ).

### Substrate (2q)

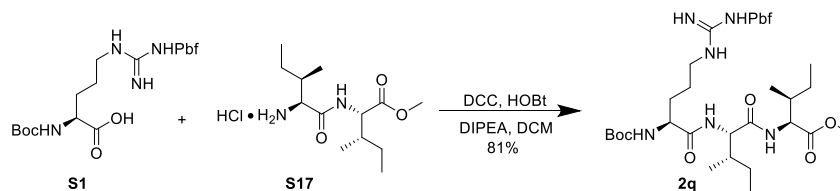

To a solution of **S1** (233.5 mg, 0.44 mmol), **S17** (103.0 mg, 0.35 mmol), HOBt (57.3 mg, 0.42 mmol) and DCC (87.9 mg, 0.43 mmol) in DCM (18 mL) was added DIPEA (0.07 mL, 0.42 mmol). The reaction mixture was stirred for 24 h at ambient temperature. Remove DCM via rotary evaporator, add EA (100 mL), then filter the white precipitate. The filtrate was washed sequentially with saturated sodium carbonate solution, water and brine, then dried over anhydrous sodium sulphate, filtered, concentrated and purified by column chromatography (Hexanes/EA 1:1.5, 1:2 then 1:3) to give **2q** (215.9 mg, 81% yield) as a white solid.

**2q**: Mp = 101–106 °C. TLC  $R_f$  (Hexane/EA 1:3) = 0.29.  $^1\text{H}$  NMR (500 MHz,  $\text{CDCl}_3$ ):  $\delta$  7.48 (s, 1H), 6.99 (s, 1H), 6.38 (s, 2H), 5.56 (s, 1H), 4.52 (s, 1H), 4.45–4.25 (s, 2H), 3.67 (s, 3H), 3.50–3.05 (m, 2H), 2.95 (s, 2H), 2.58 (s, 3H), 2.51 (s, 3H), 2.09 (s, 3H), 1.88–1.76 (m, 1H), 1.74–1.50 (m, 10H), 1.45 (s, 6H), 1.41 (s, 9H), 0.87 (s, 12H).  $^{13}\text{C}$  NMR (125 MHz,  $\text{CDCl}_3$ ):  $\delta$  173.5, 172.7, 158.9, 156.7, 156.0, 138.5, 132.9, 132.4, 124.8, 117.7, 86.5, 80.0, 53.0, 52.4, 50.9, 43.4, 41.1, 40.8, 28.7, 28.5, 25.3, 24.82, 24.75, 22.9, 22.8, 22.1, 21.9, 19.5, 18.1, 17.6, 12.6. HRMS (ESI)  $m/z$ :  $[\text{M} + \text{H}]^+$  Calcd for  $\text{C}_{37}\text{H}_{63}\text{N}_6\text{O}_9\text{S}$  767.4372; Found 767.4361.  $[\alpha]_{\text{D}}^{20}$ :  $-24.9^\circ$  ( $c$  0.25,  $\text{CH}_3\text{OH}$ ).

## 2.2 Glycosylation

### Product (3a)

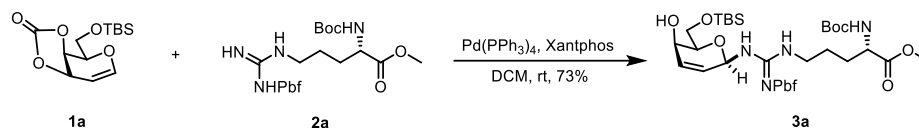

To a solution of **1a**<sup>1</sup> (43.6 mg, 0.15 mmol), **2a**<sup>2</sup> (27.7 mg, 0.05 mmol),  $\text{Pd(PPh}_3)_4$  (5.9 mg, 0.005 mmol) and Xantphos (2.9 mg, 0.005 mmol) was added anhydrous DCM (4 mL) under an argon atmosphere. The mixture was stirred at room temperature for 2 h and then concentrated in vacuo. Purification of the residue through column chromatography on silica gel (Hexane/EA 1:1 then 1:1.5) afforded the **3a** (29.1 mg, 73%) as a yellow solid.

**3a**: Mp = 73–75 °C. TLC  $R_f$  (Hexane/EA 1:2) = 0.50.  $^1\text{H}$  NMR (500 MHz,  $\text{CDCl}_3$ ):  $\delta$  7.93 (s, 1H), 6.26 (s, 1H), 6.13 (s, 1H), 5.75 (d,  $J$  = 10.5 Hz, 1H), 5.19 (d,  $J$  = 7.5 Hz, 2H), 4.23 (s, 1H), 4.08 (s, 1H), 3.83 (d,  $J$  = 4.0 Hz, 2H), 3.71 (s, 3H), 3.67 (t,  $J$  = 5.5 Hz, 1H), 3.27 (s, 1H), 3.20–3.11 (m, 1H), 2.95 (s, 2H), 2.58 (s, 3H), 2.51 (s, 3H), 2.09 (s, 3H), 1.90 (s, 1H), 1.76 (brs, 1H), 1.66–1.49 (m, 3H), 1.45 (s, 6H), 1.42 (s, 9H), 0.88 (s, 9H), 0.07 (s, 6H).  $^{13}\text{C}$  NMR (125 MHz,  $\text{CDCl}_3$ ):  $\delta$  173.2, 158.7, 155.6, 154.4, 138.5, 133.3, 132.4, 131.3, 129.9, 124.6, 117.5, 86.5, 80.2, 78.9, 76.5, 63.1, 61.7, 53.2, 52.5, 43.3, 40.9, 30.2, 28.7, 28.4, 25.9, 25.0, 19.4, 18.3, 18.1, 12.6, -5.26, -5.32. HRMS (ESI)  $m/z$ :  $[\text{M} + \text{H}]^+$  Calcd for  $\text{C}_{37}\text{H}_{63}\text{N}_4\text{O}_{10}\text{SSi}$  783.4029; Found 783.4021.  $[\alpha]_{\text{D}}^{20}$ : -3.2° ( $c$  0.56,  $\text{CH}_3\text{OH}$ ).

### Product (3b)

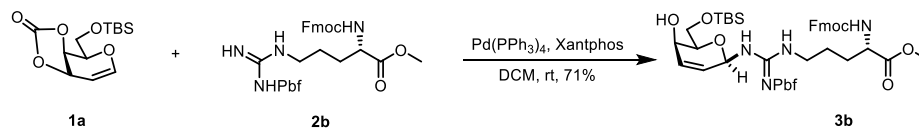

To a solution of **1a** (42.9 mg, 0.15 mmol), **2b**<sup>3</sup> (33.1 mg, 0.05 mmol),  $\text{Pd(PPh}_3)_4$  (5.8 mg, 0.005 mmol) and Xantphos (2.9 mg, 0.005 mmol) was added anhydrous DCM (4 mL) under an argon atmosphere. The mixture was stirred at room temperature for 2 h and then concentrated in vacuo. Purification of the residue through column chromatography on silica gel (Hexane/EA 1:1.2 then 1:1.5) afforded the **3b** (32.0 mg, 71%) as a yellow solid.

**3b**: Mp = 85–87 °C. TLC  $R_f$  (Hexane/EA 1:2) = 0.54.  $^1\text{H}$  NMR (500 MHz,  $\text{CD}_3\text{OD}$ ):  $\delta$  7.77 (d,  $J$  = 7.5 Hz, 2H), 7.64 (t,  $J$  = 7.0 Hz, 2H), 7.45 (d,  $J$  = 8.0 Hz, 1H), 7.37 (t,  $J$  = 7.5 Hz, 2H), 7.28 (t,  $J$  = 7.0 Hz, 2H), 6.16 (dd,  $J$  = 8.5, 5.5 Hz, 1H), 5.65 (s, 1H), 4.47–4.29 (m, 2H), 4.20 (t,  $J$  = 6.5 Hz, 1H), 4.16–4.04 (m, 1H), 3.89 (d,  $J$  = 5.5 Hz, 1H), 3.86–3.72 (m, 2H), 3.68 (s, 3H), 3.26–3.19 (m, 1H), 2.95 (s, 2H), 2.58 (s, 3H), 2.50 (s, 3H), 2.06 (s, 3H), 1.83–1.73 (m, 1H), 1.67–1.49 (m, 3H), 1.41 (s, 6H), 0.89 (s, 9H), 0.07 (s, 6H).  $^{13}\text{C}$  NMR (125 MHz,  $d^6$ -DMSO):  $\delta$  172.7, 157.6, 156.1, 153.8, 143.8, 143.7, 140.7, 137.4, 133.7, 131.5, 127.6, 127.0, 125.2, 124.4, 120.1, 116.4, 86.3, 79.2, 76.9, 65.6, 62.1, 59.5, 53.6, 51.8, 46.7, 42.4, 40.4, 28.2,

28.0, 25.8, 25.6, 19.0, 18.0, 17.6, 12.2, -5.3, -5.4. HRMS (ESI)  $m/z$ :  $[M + H]^+$  Calcd for  $C_{47}H_{65}N_4O_{10}SSi$  905.4185; Found 905.4189.  $[\alpha]_D^{20}$ :  $-4.8^\circ$  ( $c$  0.58,  $CH_3OH$ ).

### Product (3c)

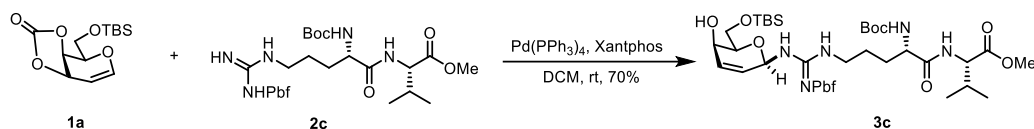

To a solution of **1a** (42.9 mg, 0.15 mmol), **2c** (31.6 mg, 0.05 mmol),  $Pd(PPh_3)_4$  (5.9 mg, 0.005 mmol) and Xantphos (2.9 mg, 0.005 mmol) was added anhydrous DCM (4 mL) under an argon atmosphere. The mixture was stirred at room temperature for 2 h and then concentrated in vacuo. Purification of the residue through column chromatography on silica gel (Hexane/EA 1:1 then 1:2) afforded the **3c** (30.6 mg, 70%) as a pale yellow solid.

**3c**: Mp = 63–64 °C. TLC  $R_f$  (Hexane/EA 1:2) = 0.56.  $^1H$  NMR (500 MHz,  $CDCl_3$ ):  $\delta$  7.99 (s, 1H), 6.92 (d,  $J$  = 7.0 Hz, 1H), 6.45–6.15 (m, 2H), 5.75 (d,  $J$  = 10.0 Hz, 1H), 5.21 (s, 1H), 5.09 (d,  $J$  = 8.0 Hz, 1H), 4.48 (dd,  $J$  = 8.5, 5.0 Hz, 1H), 4.26–4.03 (m, 2H), 3.99–3.79 (m, 3H), 3.72 (s, 3H), 3.68 (t,  $J$  = 5.5 Hz, 1H), 3.38 (brs, 1H), 3.21–3.04 (m, 1H), 2.95 (s, 2H), 2.58 (s, 3H), 2.51 (s, 3H), 2.23–2.13 (m, 1H), 2.12 (s, 1H), 2.09 (s, 3H), 1.91–1.81 (m, 2H), 1.64–1.49 (m, 3H), 1.45 (s, 6H), 1.43 (s, 9H), 0.92 (d,  $J$  = 7.0 Hz, 3H), 0.90 (d,  $J$  = 7.0 Hz, 3H), 0.89 (s, 9H), 0.08 (s, 6H).  $^{13}C$  NMR (125 MHz,  $CD_3OD$ ):  $\delta$  175.1, 173.4, 160.0, 157.8, 155.9, 139.5, 134.1, 133.6, 132.9, 129.9, 126.1, 118.5, 87.7, 80.6, 78.9, 78.4, 64.0, 61.8, 59.0, 55.5, 52.6, 44.0, 42.0, 32.0, 30.4, 28.7, 26.8, 26.5, 19.7, 19.5, 19.3, 18.5, 18.4, 12.6, -5.05, -5.13. HRMS (ESI)  $m/z$ :  $[M + H]^+$  Calcd for  $C_{42}H_{72}N_5O_{11}SSi$  882.4713; Found 882.4712.  $[\alpha]_D^{20}$ :  $-24.6^\circ$  ( $c$  0.50,  $CH_3OH$ ).

### Product (3d)

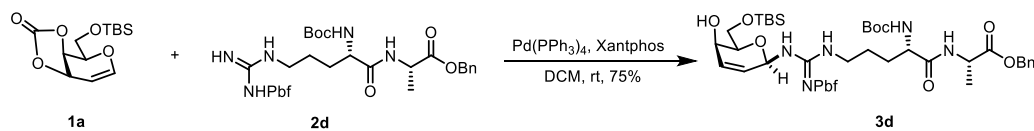

To a solution of **1a** (43.0 mg, 0.15 mmol), **2d** (34.4 mg, 0.05 mmol),  $Pd(PPh_3)_4$  (5.8 mg, 0.005 mmol) and Xantphos (2.9 mg, 0.005 mmol) was added anhydrous DCM (4 mL) under an argon atmosphere. The mixture was stirred at room temperature for 2 h and then concentrated in vacuo. Purification of the residue through column chromatography on silica gel (Hexane/EA 1:1 then 1:1.2) afforded the **3d** (34.9 mg, 75%) as a white solid.

**3d**: Mp = 69–72 °C. TLC  $R_f$  (Hexane/EA 1:2) = 0.53.  $^1H$  NMR (500 MHz,  $CDCl_3$ ):  $\delta$  8.00 (s, 1H), 7.38–7.28 (m, 5H), 7.10 (d,  $J$  = 7.0 Hz, 1H), 6.32–6.15 (m, 2H), 5.71 (d,  $J$  = 10.0 Hz, 1H), 5.25–5.05 (m, 2H), 5.18 (d,  $J$  = 12.5 Hz, 1H), 5.13 (d,  $J$  = 12.5 Hz, 1H), 4.61–4.51 (m, 1H), 4.10 (s, 2H), 3.85 (d,  $J$  = 4.0 Hz, 2H), 3.80 (brs, 1H), 3.67 (t,  $J$  = 6.0 Hz, 1H), 3.31 (s, 1H), 3.20 (s, 1H), 2.95 (s, 2H), 2.58 (s, 3H), 2.52 (s, 3H), 2.09 (s, 3H), 1.92–1.78 (m, 2H), 1.62–1.50 (m, 2H), 1.45 (s, 6H), 1.42

(d,  $J = 6.5$  Hz, 3H), 1.41 (s, 9H), 0.88 (s, 9H), 0.08 (s, 6H).  $^{13}\text{C}$  NMR (125 MHz,  $\text{CD}_3\text{OD}$ ):  $\delta$  174.7, 173.8, 160.0, 157.7, 155.9, 139.5, 137.2, 134.1, 133.6, 129.6, 129.4, 129.3, 126.1, 118.5, 87.7, 80.6, 79.0, 78.4, 68.0, 64.1, 61.8, 55.2, 49.6, 44.0, 41.9, 30.8, 28.7, 26.7, 26.5, 23.2, 19.7, 19.3, 18.5, 17.4, 12.6, -5.05, -5.12. HRMS (ESI)  $m/z$ :  $[\text{M} + \text{H}]^+$  Calcd for  $\text{C}_{46}\text{H}_{72}\text{N}_5\text{O}_{11}\text{SSi}$  930.4713; Found 930.4715.  $[\alpha]_{\text{D}}^{20}$ :  $-10.0^\circ$  (c 0.30,  $\text{CH}_3\text{OH}$ ).

### Product (3e)

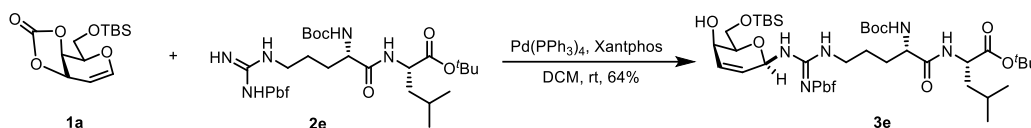

To a solution of **1a** (43.1 mg, 0.15 mmol), **2e** (34.4 mg, 0.05 mmol),  $\text{Pd}(\text{PPh}_3)_4$  (5.8 mg, 0.005 mmol) and Xantphos (3.0 mg, 0.005 mmol) was added anhydrous DCM (4 mL) under an argon atmosphere. The mixture was stirred at room temperature for 2 h and then concentrated in vacuo. Purification of the residue through column chromatography on silica gel (Hexane/EA 1:1) afforded the **3e** (29.9 mg, 64%) as a yellow solid.

**3e**: Mp =  $76-78^\circ\text{C}$ . TLC  $R_f$  (Hexane/EA 1:2) = 0.61.  $^1\text{H}$  NMR (500 MHz,  $\text{CDCl}_3$ ):  $\delta$  8.00 (s, 1H), 6.77 (s, 1H), 6.27 (s, 2H), 5.72 (d,  $J = 10.0$  Hz, 1H), 5.20 (s, 1H), 5.08 (d,  $J = 7.0$  Hz, 1H), 4.40 (d,  $J = 4.5$  Hz, 1H), 4.25-3.94 (m, 3H), 3.90-3.77 (m, 2H), 3.67 (t,  $J = 5.5$  Hz, 1H), 3.37 (brs, 1H), 3.22-3.04 (m, 1H), 2.94 (s, 2H), 2.57 (s, 3H), 2.51 (s, 3H), 2.08 (s, 3H), 1.93-1.81 (m, 1H), 1.71-1.55 (m, 3H), 1.55-1.46 (m, 3H), 1.45 (s, 6H), 1.44 (s, 9H), 1.41 (s, 9H), 0.91 (t,  $J = 6.5$  Hz, 6H), 0.88 (s, 9H), 0.07 (s, 6H).  $^{13}\text{C}$  NMR (125 MHz,  $\text{CDCl}_3$ ):  $\delta$  172.4, 172.1, 158.7, 155.8, 154.2, 138.5, 133.5, 132.4, 131.3, 130.0, 124.5, 117.4, 86.4, 82.1, 80.2, 79.0, 62.9, 61.2, 53.6, 51.6, 43.3, 41.5, 40.2, 29.4, 28.7, 28.4, 28.1, 26.0, 24.9, 23.0, 22.0, 19.4, 18.4, 18.1, 12.6, -5.2, -5.3. HRMS (ESI)  $m/z$ :  $[\text{M} + \text{H}]^+$  Calcd for  $\text{C}_{46}\text{H}_{80}\text{N}_5\text{O}_{11}\text{SSi}$  938.5339; Found 938.5346.  $[\alpha]_{\text{D}}^{20}$ :  $-13.2^\circ$  (c 0.63,  $\text{CH}_3\text{OH}$ ).

### Product (3f)

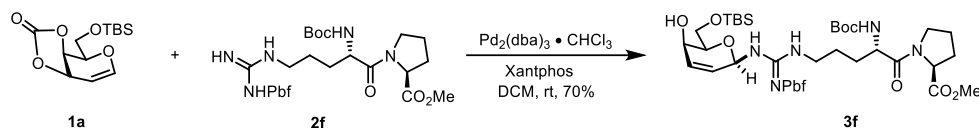

To a solution of **1a** (43.0 mg, 0.15 mmol), **2f** (31.9 mg, 0.05 mmol),  $\text{Pd}_2(\text{dba})_3 \cdot \text{CHCl}_3$  (2.7 mg, 0.0026 mmol) and Xantphos (3.0 mg, 0.005 mmol) was added anhydrous DCM (4 mL) under an argon atmosphere. The mixture was stirred at room temperature for 24 h and then concentrated in vacuo. Purification of the residue through column chromatography on silica gel (Hexane/EA 1:1, 1:2 then 1:3) afforded the **3f** (30.9 mg, 70%) as a white solid.

**3f**: Mp =  $80-83^\circ\text{C}$ . TLC  $R_f$  (Hexane/EA 1:3) = 0.35.  $^1\text{H}$  NMR (500 MHz,  $\text{CD}_3\text{OD}$ ):  $\delta$  6.21 (s, 1H), 5.67 (s, 1H), 4.45 (dd,  $J = 8.5, 5.0$  Hz, 1H), 4.26 (s, 1H), 3.92 (d,  $J = 5.5$  Hz, 1H), 3.84 (dd,  $J = 10.0, 6.0$  Hz, 1H), 3.80-3.62 (m, 3H), 3.68 (s, 3H),

3.53 (brs, 1H), 3.26-3.13 (m, 1H), 3.08-2.94 (m, 2H), 2.59 (s, 3H), 2.52 (s, 3H), 2.32-2.16 (m, 1H), 2.09 (s, 3H), 2.04-1.87 (m, 3H), 1.82-1.53 (m, 4H), 1.46 (s, 6H), 1.43 (s, 9H), 0.91 (s, 9H), 0.09 (s, 6H).  $^{13}\text{C}$  NMR (125 MHz,  $\text{CD}_3\text{OD}$ ):  $\delta$  174.0, 173.3, 160.0, 157.8, 155.9, 139.4, 134.2, 133.6, 133.1, 129.8, 126.1, 118.5, 87.8, 80.6, 78.9, 78.4, 64.0, 61.8, 60.4, 53.1, 52.7, 48.3, 43.9, 42.0, 30.0, 29.8, 28.7, 26.5, 26.2, 26.0, 19.7, 19.3, 18.5, 12.6, -5.07, -5.14. HRMS (ESI)  $m/z$ :  $[\text{M} + \text{H}]^+$  Calcd for  $\text{C}_{42}\text{H}_{70}\text{N}_5\text{O}_{11}\text{SSi}$  880.4556; Found 880.4574.  $[\alpha]_{\text{D}}^{20}$ :  $-18.0^\circ$  (c 0.36,  $\text{CH}_3\text{OH}$ ).

### Product (3g)

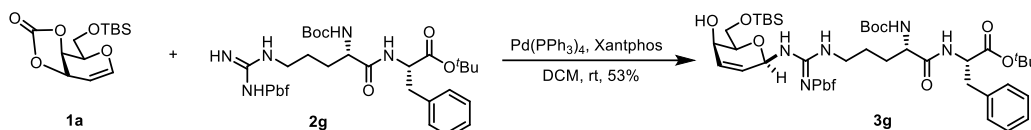

To a solution of **1a** (42.9 mg, 0.15 mmol), **2g** (36.4 mg, 0.05 mmol),  $\text{Pd}(\text{PPh}_3)_4$  (5.8 mg, 0.005 mmol) and Xantphos (2.9 mg, 0.005 mmol) was added anhydrous DCM (4 mL) under an argon atmosphere. The mixture was stirred at room temperature for 2 h and then concentrated in vacuo. Purification of the residue through column chromatography on silica gel (Hexane/EA 1:1) afforded the **3g** (25.9 mg, 53%) as a white solid.

**3g**: Mp = 78–81  $^\circ\text{C}$ . TLC  $R_f$  (Hexane/EA 1:1) = 0.33.  $^1\text{H}$  NMR (500 MHz,  $\text{CDCl}_3$ ):  $\delta$  8.02 (s, 1H), 7.31-7.19 (m, 4H), 7.10 (d,  $J$  = 7.0 Hz, 2H), 6.83 (s, 1H), 6.38-6.26 (m, 1H), 6.23 (dd,  $J$  = 8.5, 5.5 Hz, 1H), 5.72 (d,  $J$  = 10.0 Hz, 1H), 5.20 (s, 1H), 4.98 (s, 1H), 4.68 (dd,  $J$  = 13.0, 6.5 Hz, 1H), 4.16-3.98 (m, 2H), 3.92-3.78 (m, 2H), 3.67 (t,  $J$  = 5.5 Hz, 1H), 3.37 (s, 1H), 3.18-2.98 (m, 3H), 2.95 (s, 2H), 2.59 (s, 3H), 2.52 (s, 3H), 2.09 (s, 3H), 1.95-1.70 (m, 2H), 1.66-1.48 (m, 2H), 1.46 (s, 6H), 1.42 (s, 9H), 1.39 (s, 9H), 0.90 (s, 9H), 0.08 (s, 6H).  $^{13}\text{C}$  NMR (125 MHz,  $\text{CD}_3\text{OD}$ ):  $\delta$  174.6, 171.9, 160.0, 157.7, 155.9, 139.5, 138.0, 134.1, 133.6, 130.5, 129.4, 127.9, 126.1, 118.5, 96.6, 87.7, 83.1, 80.7, 79.0, 78.4, 64.1, 61.8, 55.6, 44.0, 41.9, 38.6, 30.6, 28.7, 28.2, 26.8, 26.5, 23.2, 19.7, 19.3, 18.5, 12.6, -5.05, -5.13. HRMS (ESI)  $m/z$ :  $[\text{M} + \text{H}]^+$  Calcd for  $\text{C}_{49}\text{H}_{78}\text{N}_5\text{O}_{11}\text{SSi}$  972.5182; Found 972.5182.  $[\alpha]_{\text{D}}^{20}$ :  $-5.7^\circ$  (c 0.32,  $\text{CH}_3\text{OH}$ ).

### Product (3h)

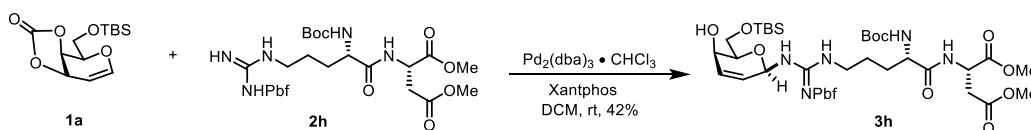

To a solution of **1a** (42.8 mg, 0.15 mmol), **2h** (33.5 mg, 0.05 mmol),  $\text{Pd}_2(\text{dba})_3 \cdot \text{CHCl}_3$  (2.6 mg, 0.0025 mmol) and Xantphos (2.9 mg, 0.005 mmol) was added anhydrous DCM (4 mL) under an argon atmosphere. The mixture was stirred at room temperature for 24 h and then concentrated in vacuo. Purification of the residue through column chromatography on silica gel (Hexane/EA 1:1.5, 1:2 then 1:2.5) afforded the **3h** (19.1 mg, 42%) as a pale yellow solid.

**3h**: Mp = 65–66 °C. Mp = 83–84 °C. TLC  $R_f$  (Hexane/EA 1:3) = 0.33.  $^1\text{H}$  NMR (500 MHz,  $\text{CDCl}_3$ ):  $\delta$  8.00 (s, 1H), 7.29 (d,  $J$  = 7.5 Hz, 1H), 6.32 (s, 1H), 6.29–6.17 (m, 1H), 5.76 (d,  $J$  = 10.5 Hz, 1H), 5.21 (s, 1H), 5.13 (d,  $J$  = 7.5 Hz, 1H), 4.91–4.78 (m, 1H), 4.15 (s, 1H), 4.11 (s, 1H), 3.85 (d,  $J$  = 5.0 Hz, 2H), 3.74 (s, 3H), 3.71–3.65 (m, 1H), 3.68 (s, 3H), 3.34 (s, 1H), 3.22–3.12 (m, 1H), 3.00 (dd,  $J$  = 17.0, 5.0 Hz, 1H), 2.95 (s, 2H), 2.84 (dd,  $J$  = 17.0, 5.0 Hz, 1H), 2.58 (s, 3H), 2.51 (s, 3H), 2.12 (s, 1H), 2.09 (s, 3H), 1.92–1.82 (m, 1H), 1.63–1.48 (m, 3H), 1.45 (s, 6H), 1.42 (s, 9H), 0.89 (s, 9H), 0.08 (s, 6H).  $^{13}\text{C}$  NMR (125 MHz,  $\text{CD}_3\text{OD}$ ):  $\delta$  172.5, 172.4, 160.0, 157.7, 156.0, 139.5, 134.1, 133.6, 126.1, 118.5, 87.7, 80.7, 79.0, 78.4, 64.1, 61.8, 55.5, 53.1, 52.5, 50.1, 43.9, 41.8, 36.7, 30.5, 28.7, 26.8, 26.5, 19.7, 19.3, 18.5, 12.6, -5.1, -5.2. HRMS (ESI)  $m/z$ :  $[\text{M} + \text{H}]^+$  Calcd for  $\text{C}_{42}\text{H}_{70}\text{N}_5\text{O}_{13}\text{SSi}$  912.4455; Found 912.4456.  $[\alpha]_{\text{D}}^{20}$ : -12.4° ( $c$  0.31,  $\text{CH}_3\text{OH}$ ).

### Product (3i)

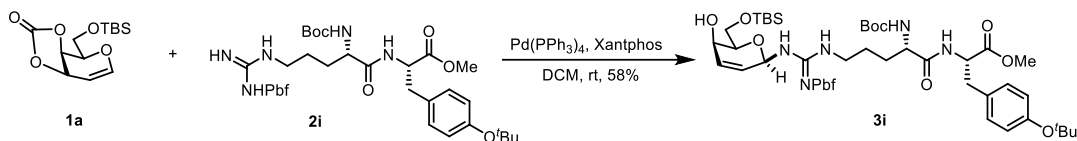

To a solution of **1a** (43.0 mg, 0.15 mmol), **2i** (38.0 mg, 0.05 mmol),  $\text{Pd}(\text{PPh}_3)_4$  (5.7 mg, 0.005 mmol) and Xantphos (2.9 mg, 0.005 mmol) was added anhydrous DCM (4 mL) under an argon atmosphere. The mixture was stirred at room temperature for 2 h and then concentrated in vacuo. Purification of the residue through column chromatography on silica gel (Hexane/EA 1:1.2 then 1:1.5) afforded the **3i** (29.1 mg, 58%) as a yellow solid.

**3i**: Mp = 85–88 °C. TLC  $R_f$  (Hexane/EA 1:3) = 0.53.  $^1\text{H}$  NMR (500 MHz,  $\text{CDCl}_3$ ):  $\delta$  7.00 (d,  $J$  = 7.0 Hz, 2H), 6.94–6.85 (m, 1H), 6.89 (d,  $J$  = 8.0 Hz, 2H), 6.32–6.16 (m, 2H), 5.73 (d,  $J$  = 10.0 Hz, 1H), 5.28–5.13 (m, 1H), 5.02 (d,  $J$  = 6.5 Hz, 1H), 4.77 (dd,  $J$  = 13.5, 6.5 Hz, 1H), 4.16–3.90 (m, 3H), 3.85 (d,  $J$  = 5.0 Hz, 1H), 3.67 (s, 3H), 3.35 (brs, 1H), 3.19–2.99 (m, 3H), 2.94 (s, 2H), 2.58 (s, 3H), 2.51 (s, 3H), 2.11 (s, 1H), 2.09 (s, 3H), 1.92–1.78 (m, 1H), 1.64–1.48 (m, 2H), 1.45 (s, 7H), 1.41 (s, 9H), 1.31 (s, 9H), 0.89 (s, 9H), 0.08 (s, 6H).  $^{13}\text{C}$  NMR (125 MHz,  $\text{CD}_3\text{OD}$ ):  $\delta$  173.3, 171.8, 158.6, 156.3, 154.5, 154.1, 138.1, 132.7, 132.2, 131.6, 129.5, 124.7, 123.8, 117.1, 86.3, 79.3, 78.1, 77.6, 77.0, 62.7, 60.4, 54.2, 53.7, 51.3, 42.6, 40.5, 36.4, 29.2, 27.9, 27.38, 27.35, 25.4, 25.1, 18.3, 17.9, 17.1, 11.2, -6.4, -6.5. HRMS (ESI)  $m/z$ :  $[\text{M} + \text{H}]^+$  Calcd for  $\text{C}_{50}\text{H}_{80}\text{N}_5\text{O}_{12}\text{SSi}$  1002.5288; Found 1002.5299.  $[\alpha]_{\text{D}}^{20}$ : -14.8° ( $c$  0.49,  $\text{CH}_3\text{OH}$ ).

### Product (3j)

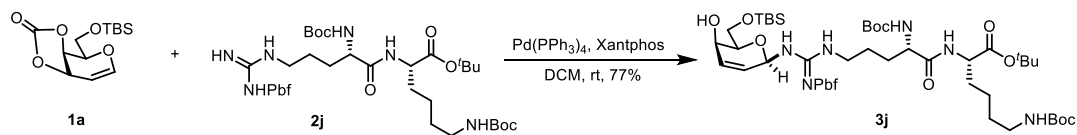

To a solution of **1a** (43.1 mg, 0.15 mmol), **2j** (40.4 mg, 0.05 mmol),  $\text{Pd}(\text{PPh}_3)_4$  (5.7 mg, 0.005 mmol) and Xantphos (2.9 mg, 0.005 mmol) was added anhydrous DCM (4 mL) under an argon atmosphere. The mixture was stirred at room

temperature for 2 h and then concentrated in vacuo. Purification of the residue through column chromatography on silica gel (Hexane/EA 1:1.2 then 1:1.5) afforded the **3j** (40.7 mg, 77%) as a white solid.

**3j**: Mp = 87–91 °C. TLC  $R_f$  (Hexane/EA 1:2) = 0.42.  $^1\text{H}$  NMR (500 MHz,  $\text{CD}_3\text{OD}$ ):  $\delta$  6.52 (s, 1H), 6.30–6.13 (m, 1H), 5.65 (s, 1H), 5.34 (brs, 1H), 4.32–4.19 (m, 1H), 4.14–3.99 (m, 1H), 3.92 (d,  $J$  = 5.0 Hz, 1H), 3.84 (dd,  $J$  = 10.5, 5.5 Hz, 1H), 3.79 (s, 1H), 3.73–3.63 (m, 1H), 3.36–3.24 (m, 2H), 3.24–3.13 (m, 1H), 3.03 (dd,  $J$  = 12.5, 6.0 Hz, 2H), 3.01 (s, 2H), 2.58 (s, 3H), 2.52 (s, 3H), 2.09 (s, 3H), 1.86–1.73 (m, 2H), 1.73–1.53 (m, 4H), 1.49–1.39 (m, 37H), 0.91 (s, 9H), 0.09 (s, 6H).  $^{13}\text{C}$  NMR (125 MHz,  $\text{CD}_3\text{OD}$ ):  $\delta$  174.8, 172.6, 159.9, 158.4, 157.7, 155.9, 139.4, 134.1, 133.5, 132.9, 129.9, 126.0, 118.5, 87.7, 82.8, 80.6, 79.8, 78.9, 78.4, 64.1, 61.8, 55.4, 54.3, 44.0, 41.9, 41.1, 32.3, 30.6, 30.4, 28.83, 28.78, 28.76, 28.3, 26.8, 26.5, 23.9, 19.7, 19.3, 18.5, 12.6, -5.0, -5.1. HRMS (ESI)  $m/z$ :  $[\text{M} + \text{H}]^+$  Calcd for  $\text{C}_{51}\text{H}_{89}\text{N}_6\text{O}_{13}\text{SSi}$  1053.5972; Found 1053.5985.  $[\alpha]_{\text{D}}^{20}$ : -6.6° (c 0.74,  $\text{CH}_3\text{OH}$ ).

### Product (3k)

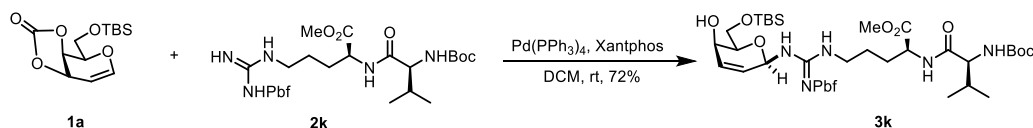

To a solution of **1a** (43.0 mg, 0.15 mmol), **2k** (32.0 mg, 0.05 mmol),  $\text{Pd}(\text{PPh}_3)_4$  (5.8 mg, 0.005 mmol) and Xantphos (2.9 mg, 0.005 mmol) was added anhydrous DCM (4 mL) under an argon atmosphere. The mixture was stirred at room temperature for 2 h and then concentrated in vacuo. Purification of the residue through column chromatography on silica gel (Hexane/EA 1:1.2 then 1:1.5) afforded the **3k** (31.6 mg, 72%) as a white solid.

**3k**: Mp = 98–102 °C. TLC  $R_f$  (Hexane/EA 1:2) = 0.34.  $^1\text{H}$  NMR (500 MHz,  $\text{CD}_3\text{OD}$ ):  $\delta$  6.52 (d,  $J$  = 8.5 Hz, 1H), 6.20 (s, 1H), 5.66 (s, 1H), 4.37 (s, 1H), 3.93 (d,  $J$  = 5.0 Hz, 1H), 3.90–3.73 (m, 3H), 3.72–3.62 (m, 1H), 3.67 (s, 3H), 3.29–3.16 (m, 2H), 3.01 (s, 2H), 2.58 (s, 3H), 2.51 (s, 3H), 2.08 (s, 3H), 2.06–1.95 (m, 1H), 1.87–1.77 (m, 1H), 1.70–1.52 (m, 3H), 1.46 (s, 6H), 1.43 (s, 9H), 0.96 (d,  $J$  = 6.5 Hz, 3H), 0.93 (d,  $J$  = 6.5 Hz, 3H), 0.91 (s, 9H), 0.10 (s, 6H).  $^{13}\text{C}$  NMR (125 MHz,  $\text{CD}_3\text{OD}$ ):  $\delta$  174.6, 173.5, 159.9, 157.9, 155.9, 139.4, 134.1, 133.5, 132.7, 129.9, 126.0, 118.5, 87.7, 80.5, 79.0, 78.4, 64.1, 61.7, 61.3, 53.4, 52.7, 43.9, 41.8, 32.0, 29.7, 28.7, 26.7, 26.5, 19.73, 19.67, 19.3, 18.6, 18.5, 12.6, -5.06, -5.13. HRMS (ESI)  $m/z$ :  $[\text{M} + \text{H}]^+$  Calcd for  $\text{C}_{42}\text{H}_{72}\text{N}_5\text{O}_{11}\text{SSi}$  882.4713; Found 882.4721.  $[\alpha]_{\text{D}}^{20}$ : -8.9° (c 0.80,  $\text{CH}_3\text{OH}$ ).

### Product (3l)

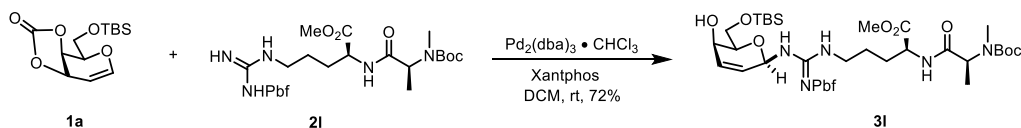

To a solution of **1a** (43.0 mg, 0.15 mmol), **2l** (31.3 mg, 0.05 mmol), Pd<sub>2</sub>(dba)<sub>3</sub> • CHCl<sub>3</sub> (2.7 mg, 0.0026 mmol) and Xantphos (2.9 mg, 0.005 mmol) was added anhydrous DCM (4 mL) under an argon atmosphere. The mixture was stirred at room temperature for 24 h and then concentrated in vacuo. Purification of the residue through column chromatography on silica gel (Hexane/EA 1:1.5, 1:2 then 1:3) afforded the **3l** (31.3 mg, 72%) as a pale yellow solid.

**3l**: Mp = 67–70 °C. TLC R<sub>f</sub> (Hexane/EA 1:3) = 0.52. <sup>1</sup>H NMR (500 MHz, CD<sub>3</sub>OD): δ 6.27–6.12 (m, 1H), 5.66 (brs, 1H), 5.44–5.20 (m, 1H), 4.58 (s, 1H), 4.34 (s, 1H), 3.92 (d, *J* = 5.5 Hz, 1H), 3.84 (dd, *J* = 10.5, 5.5 Hz, 1H), 3.78 (s, 1H), 3.69 (s, 4H), 3.28–3.16 (m, 2H), 3.01 (s, 2H), 2.84 (s, 3H), 2.57 (s, 3H), 2.51 (s, 3H), 2.09 (s, 3H), 1.91–1.78 (m, 1H), 1.70–1.52 (m, 3H), 1.46 (s, 6H), 1.45 (s, 9H), 1.35 (dd, *J* = 10.0, 7.0 Hz, 4H), 0.91 (s, 9H), 0.10 (s, 6H). <sup>13</sup>C NMR (125 MHz, CD<sub>3</sub>OD): δ 174.7, 173.7, 160.0, 157.5, 155.9, 139.4, 134.2, 133.5, 132.9, 129.8, 126.1, 118.5, 99.4, 96.6, 87.7, 81.6, 79.0, 78.5, 64.1, 61.7, 53.5, 52.8, 44.0, 41.8, 31.0, 29.6, 28.7, 27.0, 26.5, 23.2, 19.7, 19.3, 18.5, 12.5, -5.07, -5.14. HRMS (ESI) *m/z*: [M + H]<sup>+</sup> Calcd for C<sub>41</sub>H<sub>70</sub>N<sub>5</sub>O<sub>11</sub>SSi 868.4556; Found 868.4564. [α]<sub>D</sub><sup>20</sup>: -11.8° (c 0.34, CH<sub>3</sub>OH).

### Product (3m)

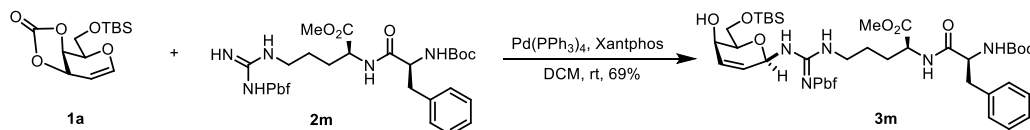

To a solution of **1a** (43.0 mg, 0.15 mmol), **2m** (34.4 mg, 0.05 mmol), Pd(PPh<sub>3</sub>)<sub>4</sub> (5.8 mg, 0.005 mmol) and Xantphos (2.8 mg, 0.005 mmol) was added anhydrous DCM (4 mL) under an argon atmosphere. The mixture was stirred at room temperature for 2 h and then concentrated in vacuo. Purification of the residue through column chromatography on silica gel (Hexane/EA 1:1 then 1:1.2) afforded the **3m** (32.1 mg, 69%) as a white solid.

**3m**: Mp = 88–90 °C. TLC R<sub>f</sub> (Hexane/EA 1:3) = 0.52. <sup>1</sup>H NMR (500 MHz, CD<sub>3</sub>OD): δ 7.31–7.15 (m, 5H), 6.63 (d, *J* = 8.0 Hz, 1H), 6.28–6.13 (m, 1H), 5.66 (s, 1H), 5.46–5.18 (m, 1H), 4.38 (dd, *J* = 7.0, 5.0 Hz, 1H), 4.35–4.29 (m, 1H), 3.92 (d, *J* = 5.5 Hz, 1H), 3.84 (dd, *J* = 10.5, 6.5 Hz, 1H), 3.83–3.73 (m, 1H), 3.69 (s, 1H), 3.66 (s, 3H), 3.23 (t, *J* = 6.0 Hz, 2H), 3.09 (dd, *J* = 14.0, 5.0 Hz, 1H), 3.00 (s, 2H), 2.82 (dd, *J* = 13.5, 9.5 Hz, 1H), 2.58 (s, 3H), 2.51 (s, 3H), 2.08 (s, 3H), 1.88–1.75 (m, 1H), 1.67–1.59 (m, 1H), 1.58–1.51 (m, 2H), 1.45 (s, 6H), 1.35 (s, 9H), 0.91 (s, 9H), 0.09 (s, 6H). <sup>13</sup>C NMR (125 MHz, CD<sub>3</sub>OD): δ 174.4, 173.5, 160.0, 157.5, 155.9, 139.4, 138.5, 134.1, 133.5, 130.4, 129.4, 127.7, 126.1, 118.5, 87.7, 80.6, 79.0, 78.5, 64.1, 61.8, 57.2, 53.4, 52.8, 43.9, 41.8, 39.2, 29.9, 28.73, 28.69, 26.6, 26.5, 19.7, 19.3, 18.5, 12.6, -5.06, -5.14. HRMS (ESI) *m/z*: [M + H]<sup>+</sup> Calcd for C<sub>46</sub>H<sub>72</sub>N<sub>5</sub>O<sub>11</sub>SSi 930.4713; Found 930.4721. [α]<sub>D</sub><sup>20</sup>: -3.6° (c 0.44, CH<sub>3</sub>OH).

### Product (3n)

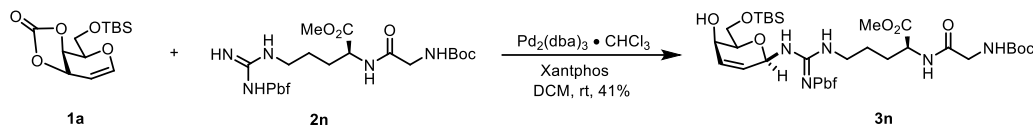

To a solution of **1a** (43.1 mg, 0.15 mmol), **2n** (29.8 mg, 0.05 mmol),  $\text{Pd}_2(\text{dba})_3 \cdot \text{CHCl}_3$  (2.6 mg, 0.0025 mmol) and Xantphos (2.9 mg, 0.005 mmol) was added anhydrous DCM (4 mL) under an argon atmosphere. The mixture was stirred at room temperature for 24 h and then concentrated in vacuo. Purification of the residue through column chromatography on silica gel (Hexane/EA 1:1.5, 1:2) afforded the **3n** (17.2 mg, 41%) as a pale yellow solid.

**3n**: Mp = 74–77 °C. TLC  $R_f$  (Hexane/EA 1:3) = 0.22.  $^1\text{H}$  NMR (500 MHz,  $\text{CD}_3\text{OD}$ ):  $\delta$  6.27–6.14 (m, 1H), 5.66 (s, 1H), 4.40 (s, 1H), 3.92 (d,  $J$  = 5.5 Hz, 1H), 3.85 (dd,  $J$  = 10.0, 6.0 Hz, 1H), 3.82–3.75 (m, 1H), 3.92 (d,  $J$  = 5.5 Hz, 2H), 3.69 (s, 4H), 3.23 (t,  $J$  = 5.0 Hz, 1H), 3.01 (s, 2H), 2.84 (s, 3H), 2.57 (s, 3H), 2.51 (s, 3H), 2.09 (s, 3H), 1.88–1.76 (m, 1H), 1.70–1.61 (m, 1H), 1.59–1.52 (m, 2H), 1.46 (s, 6H), 1.44 (s, 9H), 0.91 (s, 9H), 0.10 (s, 6H).  $^{13}\text{C}$  NMR (125 MHz,  $\text{CD}_3\text{OD}$ ):  $\delta$  173.7, 172.4, 160.0, 158.4, 155.9, 139.4, 134.1, 133.5, 126.1, 118.5, 99.4, 87.8, 80.7, 78.5, 64.1, 61.8, 53.3, 52.8, 44.0, 43.9, 41.8, 29.9, 28.7, 26.4, 21.1, 19.6, 19.3, 18.5, 17.5, 12.5, -5.1, -5.2. HRMS (ESI)  $m/z$ :  $[\text{M} + \text{H}]^+$  Calcd for  $\text{C}_{39}\text{H}_{66}\text{N}_5\text{O}_{11}\text{SSi}$  840.4243; Found 840.4241.  $[\alpha]_{\text{D}}^{20}$ : -8.8° ( $c$  0.24,  $\text{CH}_3\text{OH}$ ).

### Product (3o)

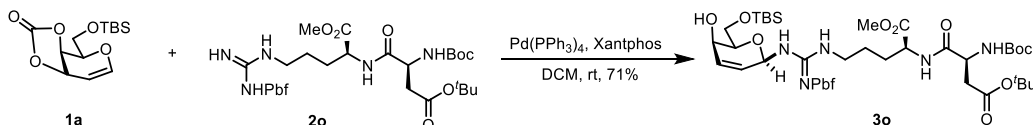

To a solution of **1a** (43.0 mg, 0.15 mmol), **2o** (35.7 mg, 0.05 mmol),  $\text{Pd}(\text{PPh}_3)_4$  (5.9 mg, 0.005 mmol) and Xantphos (2.9 mg, 0.005 mmol) was added anhydrous DCM (4 mL) under an argon atmosphere. The mixture was stirred at room temperature for 2 h and then concentrated in vacuo. Purification of the residue through column chromatography on silica gel (Hexane/EA 1:1 then 1:2) afforded the **3o** (34.1 mg, 71%) as a pale yellow solid.

**3o**: Mp = 70–74 °C. TLC  $R_f$  (Hexane/EA 1:3) = 0.62.  $^1\text{H}$  NMR (500 MHz,  $\text{CD}_3\text{OD}$ ):  $\delta$  6.20 (s, 1H), 5.66 (s, 1H), 5.46–5.20 (m, 1H), 4.44 (t,  $J$  = 6.5 Hz, 1H), 4.37 (s, 1H), 3.93 (d,  $J$  = 5.0 Hz, 1H), 3.85 (dd,  $J$  = 10.5, 5.5 Hz, 1H), 3.83–3.73 (m, 1H), 3.68 (s, 4H), 3.22 (t,  $J$  = 6.0 Hz, 2H), 3.01 (s, 2H), 2.73 (dd,  $J$  = 16.0, 5.5 Hz, 1H), 2.57 (s, 3H), 2.57–2.52 (m, 1H), 2.51 (s, 3H), 2.09 (s, 3H), 1.89–1.77 (m, 1H), 1.71–1.61 (m, 1H), 1.61–1.51 (m, 2H), 1.46 (s, 6H), 1.45 (s, 9H), 1.44 (s, 9H), 0.91 (s, 9H), 0.09 (s, 6H).  $^{13}\text{C}$  NMR (125 MHz,  $\text{CD}_3\text{OD}$ ):  $\delta$  173.6, 173.5, 171.3, 160.0, 157.5, 155.9, 139.4, 134.1, 133.5, 132.9, 129.9, 126.1, 118.5, 87.7, 82.4, 80.8, 79.0, 78.4, 64.1, 61.8, 53.4, 52.8, 52.6, 44.0, 41.8, 38.7, 29.8, 28.7, 28.3, 26.6, 26.5, 26.4, 19.7, 19.3, 18.5, 12.6, -5.06, -5.13. HRMS (ESI)  $m/z$ :  $[\text{M} + \text{H}]^+$  Calcd for  $\text{C}_{45}\text{H}_{76}\text{N}_5\text{O}_{13}\text{SSi}$  954.4924; Found 954.4919.  $[\alpha]_{\text{D}}^{20}$ : -5.9° ( $c$  0.44,  $\text{CH}_3\text{OH}$ ).

### Product (3p)

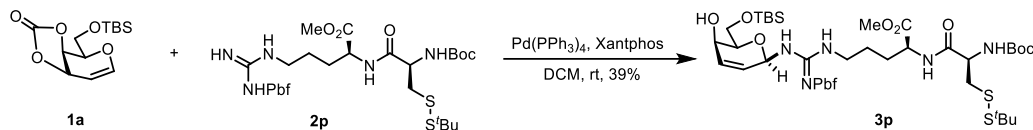

To a solution of **1a** (43.0 mg, 0.15 mmol), **2p** (36.6 mg, 0.05 mmol), Pd(PPh<sub>3</sub>)<sub>4</sub> (5.9 mg, 0.005 mmol) and Xantphos (2.9 mg, 0.005 mmol) was added anhydrous DCM (4 mL) under an argon atmosphere. The mixture was stirred at room temperature for 2 h and then concentrated in vacuo. Purification of the residue through column chromatography on silica gel (Hexane/EA 1:1 then 1:1.2) afforded the **3p** (19.0 mg, 39%) as a yellow solid.

**3p**: Mp = 76–79 °C. TLC R<sub>f</sub> (Hexane/EA 1:3) = 0.64. <sup>1</sup>H NMR (500 MHz, CD<sub>3</sub>OD): δ 6.20 (s, 1H), 5.66 (s, 1H), 5.50–5.15 (m, 1H), 4.38 (s, 1H), 4.34 (dd, *J* = 8.5, 5.0 Hz, 1H), 3.92 (d, *J* = 5.5 Hz, 1H), 3.85 (dd, *J* = 10.0, 6.0 Hz, 1H), 3.82–3.74 (m, 1H), 3.69 (s, 4H), 3.22 (t, *J* = 6.0 Hz, 2H), 3.12 (dd, *J* = 13.5, 5.0 Hz, 1H), 3.01 (s, 2H), 2.93 (dd, *J* = 13.0, 9.5 Hz, 1H), 2.57 (s, 3H), 2.51 (s, 3H), 2.09 (s, 3H), 1.90–1.76 (m, 1H), 1.73–1.61 (m, 1H), 1.61–1.51 (m, 2H), 1.46 (s, 6H), 1.44 (s, 9H), 1.34 (s, 9H), 0.91 (s, 9H), 0.10 (s, 6H). <sup>13</sup>C NMR (125 MHz, CD<sub>3</sub>OD): δ 173.4, 173.2, 160.0, 157.6, 155.9, 139.4, 134.1, 133.5, 126.1, 118.5, 87.7, 80.9, 79.0, 78.4, 64.1, 61.8, 55.5, 53.5, 52.8, 44.0, 43.6, 41.8, 30.2, 29.8, 28.8, 26.7, 26.5, 26.4, 19.7, 19.3, 18.5, 12.6, -5.04, -5.12. HRMS (ESI) *m/z*: [M + H]<sup>+</sup> Calcd for C<sub>44</sub>H<sub>76</sub>N<sub>5</sub>O<sub>11</sub>S<sub>3</sub>Si 974.4467; Found 974.4459. [α]<sub>D</sub><sup>20</sup>: –42.0° (*c* 0.35, CH<sub>3</sub>OH).

### Product (3q)

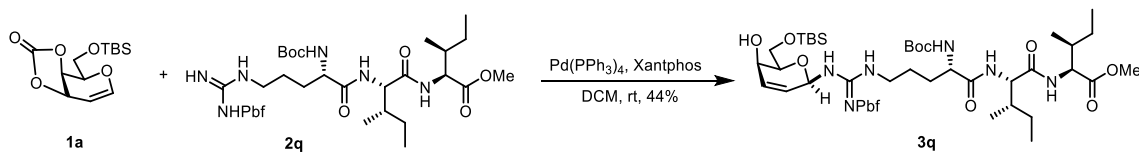

To a solution of **1a** (43.0 mg, 0.15 mmol), **2q** (38.3 mg, 0.05 mmol), Pd(PPh<sub>3</sub>)<sub>4</sub> (5.8 mg, 0.005 mmol) and Xantphos (2.9 mg, 0.005 mmol) was added anhydrous DCM (4 mL) under an argon atmosphere. The mixture was stirred at room temperature for 2 h and then concentrated in vacuo. Purification of the residue through column chromatography on silica gel (Hexane/EA 1:1.2 then 1:1.5) afforded the **3q** (22.0 mg, 44%) as a white solid.

**3q**: Mp = 68–72 °C. TLC R<sub>f</sub> (Hexane/EA 1:3) = 0.51. <sup>1</sup>H NMR (500 MHz, CD<sub>3</sub>OD): δ 6.29–6.14 (m, 1H), 5.65 (s, 1H), 5.45–5.23 (m, 1H), 4.51–4.38 (m, 2H), 4.02 (t, *J* = 7.0 Hz, 1H), 3.92 (d, *J* = 5.0 Hz, 1H), 3.84 (dd, *J* = 10.0, 5.5 Hz, 1H), 3.79 (s, 1H), 3.69 (s, 4H), 3.27 (brs, 1H), 3.22–3.13 (m, 1H), 3.01 (s, 2H), 2.58 (s, 3H), 2.51 (s, 3H), 2.09 (s, 3H), 1.77–1.66 (m, 3H), 1.62–1.54 (m, 6H), 1.46 (s, 6H), 1.44 (s, 9H), 0.96 (d, *J* = 6.5 Hz, 3H), 0.94–0.88 (m, 16H), 0.88 (d, *J* = 6.5 Hz, 3H), 0.09 (s, 6H). <sup>13</sup>C NMR (125 MHz, CD<sub>3</sub>OD): δ 174.7, 174.6, 174.4, 160.0, 157.8, 155.9, 139.5, 134.1, 133.6, 126.1, 118.5, 87.7, 80.6, 79.0, 78.4, 64.0, 61.8, 55.5, 52.9, 52.7, 52.1, 44.0, 42.0, 41.4, 30.3, 28.7, 26.8, 26.5, 25.9, 25.7, 23.43,

23.35, 22.2, 21.9, 19.7, 19.3, 18.5, 12.6, -5.05, -5.12. HRMS (ESI)  $m/z$ :  $[M + H]^+$  Calcd for  $C_{49}H_{85}N_6O_{12}SSi$  1009.5710; Found 1009.5707.  $[\alpha]_D^{20}$ :  $-23.8^\circ$  ( $c$  0.31,  $CH_3OH$ ).

### Product (3r)

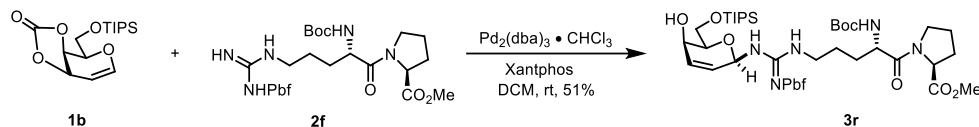

To a solution of **1b**<sup>1</sup> (49.9 mg, 0.15 mmol), **2f** (31.9 mg, 0.05 mmol),  $Pd_2(dba)_3 \cdot CHCl_3$  (2.7 mg, 0.0026 mmol) and Xantphos (3.0 mg, 0.005 mmol) was added anhydrous DCM (4 mL) under an argon atmosphere. The mixture was stirred at room temperature for 24 h and then concentrated in vacuo. Purification of the residue through column chromatography on silica gel (Hexane/EA 1:1, 1:2) afforded the **3r** (23.6 mg, 51%) as a yellow solid.

**3r**: Mp = 73–75 °C. TLC  $R_f$  (EA) = 0.69.  $^1H$  NMR (500 MHz,  $CD_3OD$ ):  $\delta$  6.22 (s, 1H), 5.68 (s, 1H), 4.45 (dd,  $J$  = 8.5, 5.0 Hz, 1H), 4.27 (s, 1H), 3.95 (d,  $J$  = 5.5 Hz, 1H), 3.93 (dd,  $J$  = 10.0, 6.0 Hz, 1H), 3.87 (s, 1H), 3.78–3.71 (m, 2H), 3.68 (s, 3H), 3.64–3.45 (m, 1H), 3.25–3.17 (m, 1H), 3.04 (d,  $J$  = 15.8 Hz, 1H), 2.99 (d,  $J$  = 15.8 Hz, 1H), 2.59 (s, 3H), 2.52 (s, 3H), 2.29–2.16 (m, 1H), 2.09 (s, 3H), 2.05–1.88 (m, 3H), 1.75–1.51 (m, 4H), 1.46 (s, 6H), 1.43 (s, 9H), 1.16–1.05 (m, 21H).  $^{13}C$  NMR (125 MHz,  $CD_3OD$ ):  $\delta$  174.0, 173.3, 159.9, 157.8, 155.9, 139.4, 134.2, 133.6, 133.0, 129.8, 126.1, 118.5, 87.7, 80.6, 79.0, 78.5, 64.3, 61.8, 60.4, 53.1, 52.7, 48.2, 43.9, 42.1, 30.0, 29.8, 28.7, 26.2, 26.0, 19.70, 19.67, 18.5, 13.2, 12.6. HRMS (ESI)  $m/z$ :  $[M + H]^+$  Calcd for  $C_{45}H_{76}N_5O_{11}SSi$  922.5026; Found 922.5029.  $[\alpha]_D^{20}$ :  $-13.8^\circ$  ( $c$  0.43,  $CH_3OH$ ).

### Product (3s)

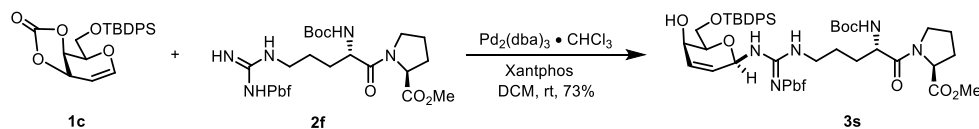

To a solution of **1c**<sup>1</sup> (61.6 mg, 0.15 mmol), **2f** (31.8 mg, 0.05 mmol),  $Pd_2(dba)_3 \cdot CHCl_3$  (2.6 mg, 0.0025 mmol) and Xantphos (2.9 mg, 0.005 mmol) was added anhydrous DCM (4 mL) under an argon atmosphere. The mixture was stirred at room temperature for 24 h and then concentrated in vacuo. Purification of the residue through column chromatography on silica gel (Hexane/EA 1:1, 1:2) afforded the **3s** (36.4 mg, 73%) as a pale yellow solid.

**3s**: Mp = 96–99 °C. TLC  $R_f$  (EA) = 0.59.  $^1H$  NMR (500 MHz,  $CD_3OD$ ):  $\delta$  7.72 (td,  $J$  = 8.0, 1.0 Hz, 4H), 7.46–7.29 (m, 6H), 6.20 (dd,  $J$  = 8.5, 5.5 Hz, 1H), 5.68 (s, 1H), 4.41 (dd,  $J$  = 7.5, 4.5 Hz, 1H), 4.19 (s, 1H), 3.97 (d,  $J$  = 4.5 Hz, 1H), 3.94–3.88 (m, 1H), 3.84 (s, 2H), 3.74–3.60 (m, 1H), 3.64 (s, 3H), 3.43 (brs, 1H), 3.21 (s, 1H), 3.16–3.06 (m, 1H), 2.95 (s, 2H), 2.59 (s, 3H), 2.51 (s, 3H), 2.24–2.14 (m, 1H), 2.06 (s, 3H), 1.92 (s, 3H), 1.70–1.46 (m, 4H), 1.44–1.36 (m, 15H), 1.04 (s, 9H).  $^{13}C$  NMR (125 MHz,  $CD_3OD$ ):  $\delta$  174.0, 173.2, 159.9, 157.7, 155.9, 139.4, 136.7, 134.6, 134.5, 134.2, 133.6, 132.8, 130.9, 129.9,

128.9, 128.8, 126.1, 118.5, 87.7, 80.6, 78.9, 78.6, 65.1, 61.9, 60.4, 53.1, 52.7, 48.2, 43.9, 42.1, 29.9, 29.8, 28.7, 27.4, 26.1, 25.9, 20.1, 19.7, 18.5, 12.6. HRMS (ESI)  $m/z$ :  $[M + H]^+$  Calcd for  $C_{52}H_{74}N_5O_{11}SSi$  1004.4869; Found 1004.4876.  $[\alpha]_D^{20}$ :  $-15.6^\circ$  ( $c$  0.67,  $CH_3OH$ ).

### Product (3t)

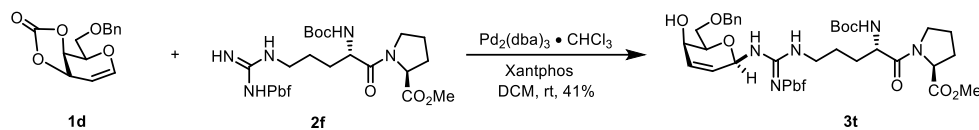

To a solution of **1d**<sup>1</sup> (39.3 mg, 0.15 mmol), **2f** (31.9 mg, 0.05 mmol),  $Pd_2(dba)_3 \cdot CHCl_3$  (2.6 mg, 0.0025 mmol) and Xantphos (2.9 mg, 0.005 mmol) was added anhydrous DCM (4 mL) under an argon atmosphere. The mixture was stirred at room temperature for 2 h and then concentrated in vacuo. Purification of the residue through column chromatography on silica gel (Hexane/EA 1:2, 1:3), concentration and then further purification by a big TLC (EA) afforded the **3t** (17.4 mg, 41%) as a white solid.

**3t**: Mp = 75–78 °C. TLC  $R_f$  (EA) = 0.42.  $^1H$  NMR (500 MHz,  $CD_3OD$ ):  $\delta$  7.41–7.24 (m, 5H), 6.18 (s, 1H), 5.68 (s, 1H), 5.31 (s, 1H), 4.85 (s, 2H), 4.57 (s, 2H), 4.44 (dd,  $J$  = 8.5, 4.5 Hz, 1H), 4.23 (s, 1H), 3.90 (d,  $J$  = 5.0 Hz, 1H), 3.86 (t,  $J$  = 4.5 Hz, 1H), 3.71 (s, 2H), 3.66 (s, 3H), 3.50 (s, 1H), 3.24–3.17 (m, 1H), 2.99 (s, 2H), 2.59 (s, 3H), 2.52 (s, 3H), 2.29–2.17 (m, 1H), 2.08 (s, 3H), 2.02–1.87 (m, 3H), 1.75–1.65 (m, 1H), 1.65–1.50 (m, 3H), 1.44 (s, 6H), 1.42 (s, 9H).  $^{13}C$  NMR (125 MHz,  $CD_3OD$ ):  $\delta$  174.0, 173.4, 159.9, 157.8, 156.0, 139.4, 139.3, 134.2, 133.6, 132.9, 129.5, 129.1, 128.9, 126.1, 118.5, 87.7, 80.6, 78.7, 76.9, 74.5, 71.4, 62.4, 60.4, 53.2, 52.7, 48.2, 43.9, 42.0, 29.9, 29.8, 28.7, 26.3, 26.0, 19.70, 19.68, 18.5, 12.6, 12.5. HRMS (ESI)  $m/z$ :  $[M + H]^+$  Calcd for  $C_{43}H_{62}N_5O_{11}S$  856.4161; Found 856.4168.  $[\alpha]_D^{20}$ :  $-22.7^\circ$  ( $c$  0.33,  $CH_3OH$ ).

### Product (3u)

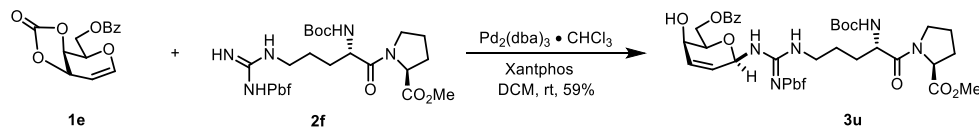

To a solution of **1e**<sup>1</sup> (41.3 mg, 0.15 mmol), **2f** (31.9 mg, 0.05 mmol),  $Pd_2(dba)_3 \cdot CHCl_3$  (2.6 mg, 0.0025 mmol) and Xantphos (2.9 mg, 0.005 mmol) was added anhydrous DCM (4 mL) under an argon atmosphere. The mixture was stirred at room temperature for 1 h and then concentrated in vacuo. Purification of the residue through column chromatography on silica gel (Hexane/EA 1:2, 1:3), concentration and then further purification by a big TLC (EA) afforded the **3u** (25.9 mg, 59%) as a white solid.

**3u**: Mp = 96–100 °C. TLC  $R_f$  (EA) = 0.40.  $^1H$  NMR (500 MHz,  $CD_3OD$ ):  $\delta$  8.05 (d,  $J$  = 8.0 Hz, 2H), 7.61 (t,  $J$  = 7.5 Hz, 1H), 7.49 (t,  $J$  = 8.0 Hz, 2H), 7.41–7.24 (m, 5H), 6.23 (s, 1H), 5.74 (s, 1H), 5.43 (brs, 1H), 4.48 (s, 2H), 4.43 (dd,  $J$  = 8.5,

5.0 Hz, 1H), 4.23 (brs, 1H), 4.08 (t,  $J = 5.0$  Hz, 1H), 4.04 (d,  $J = 4.5$  Hz, 1H), 3.71 (s, 1H), 3.66 (s, 3H), 3.51 (brs, 1H), 3.28-3.14 (m, 2H), 2.96 (s, 2H), 2.57 (s, 3H), 2.51 (s, 3H), 2.28-2.17 (m, 1H), 2.05 (s, 3H), 2.01-1.95 (m, 2H), 1.94-1.86 (m, 1H), 1.75-1.65 (m, 1H), 1.64-1.49 (m, 3H), 1.44 (s, 6H), 1.42 (s, 9H).  $^{13}\text{C}$  NMR (125 MHz,  $\text{CD}_3\text{OD}$ ):  $\delta$  174.0, 173.3, 167.8, 160.0, 157.8, 156.0, 139.4, 134.4, 134.1, 133.6, 131.3, 130.7, 129.7, 126.1, 118.5, 87.8, 80.6, 78.9, 75.8, 65.4, 62.1, 60.4, 53.1, 52.8, 48.3, 43.9, 42.0, 29.9, 29.7, 28.7, 26.2, 26.0, 19.7, 18.5, 12.5. HRMS (ESI)  $m/z$ :  $[\text{M} + \text{H}]^+$  Calcd for  $\text{C}_{43}\text{H}_{60}\text{N}_5\text{O}_{12}\text{S}$  870.3954, found 870.3956.  $[\alpha]_{\text{D}}^{20}$ :  $+4.0^\circ$  ( $c$  0.30,  $\text{CH}_3\text{OH}$ ).

### Product (3v)

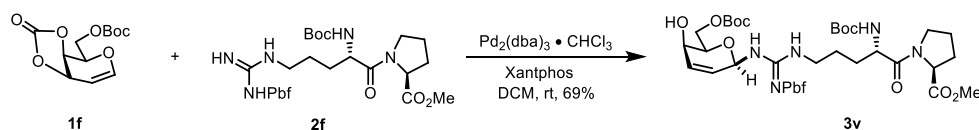

To a solution of **1f**<sup>4</sup> (40.8 mg, 0.15 mmol), **2f** (31.8 mg, 0.05 mmol),  $\text{Pd}_2(\text{dba})_3 \cdot \text{CHCl}_3$  (2.6 mg, 0.0025 mmol) and Xantphos (2.9 mg, 0.005 mmol) was added anhydrous DCM (4 mL) under an argon atmosphere. The mixture was stirred at room temperature for 2 h and then concentrated in vacuo. Purification of the residue through column chromatography on silica gel (Hexane/EA 1:2, 1:2.5 and 1:3) afforded the **3v** (30.0 mg, 69%) as a white solid.

**3v**: Mp = 93–96 °C. TLC  $R_f$  (EA) = 0.26.  $^1\text{H}$  NMR (500 MHz,  $\text{CD}_3\text{OD}$ ):  $\delta$  6.66 (s, 1H), 6.19 (s, 1H), 5.71 (s, 1H), 5.35 (brs, 1H), 4.45 (dd,  $J = 9.0, 5.0$  Hz, 1H), 4.26 (s, 1H), 4.24 (dd,  $J = 11.3, 4.0$  Hz, 1H), 4.18 (s, 1H), 3.92 (d,  $J = 4.5$  Hz, 1H), 3.89 (t,  $J = 6.5$  Hz, 1H), 3.75 (s, 1H), 3.68 (s, 3H), 3.55 (brs, 1H), 3.26 (s, 1H), 3.04 (d,  $J = 15.5$  Hz, 1H), 3.00 (d,  $J = 15.5$  Hz, 1H), 2.60 (s, 3H), 2.53 (s, 3H), 2.31-2.17 (m, 1H), 2.09 (s, 3H), 2.03-1.88 (m, 3H), 1.78-1.70 (m, 1H), 1.69-1.53 (m, 3H), 1.47 (s, 9H), 1.46 (s, 6H), 1.43 (s, 9H).  $^{13}\text{C}$  NMR (125 MHz,  $\text{CD}_3\text{OD}$ ):  $\delta$  174.0, 173.3, 159.9, 157.7, 155.9, 154.9, 139.5, 134.1, 133.6, 132.5, 129.6, 126.1, 118.5, 87.8, 83.2, 80.6, 78.9, 75.8, 67.4, 61.9, 60.4, 53.1, 52.8, 48.3, 43.9, 42.0, 30.0, 29.8, 28.7, 28.0, 26.1, 26.0, 19.7, 18.5, 12.6. HRMS (ESI)  $m/z$ :  $[\text{M} + \text{H}]^+$  Calcd for  $\text{C}_{41}\text{H}_{64}\text{N}_5\text{O}_{13}\text{S}$  866.4216; Found 866.4269.  $[\alpha]_{\text{D}}^{20}$ :  $-7.6^\circ$  ( $c$  0.82,  $\text{CH}_3\text{OH}$ ).

### Product (3w)

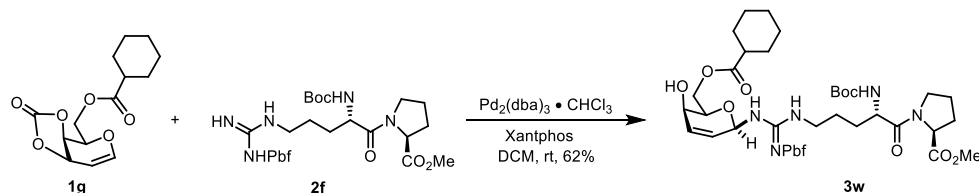

To a solution of **1g**<sup>4</sup> (42.4 mg, 0.15 mmol), **2f** (31.8 mg, 0.05 mmol),  $\text{Pd}_2(\text{dba})_3 \cdot \text{CHCl}_3$  (2.7 mg, 0.0026 mmol) and Xantphos (2.9 mg, 0.005 mmol) was added anhydrous DCM (4 mL) under an argon atmosphere. The mixture was stirred at

room temperature for 1 h and then concentrated in vacuo. Purification of the residue through column chromatography on silica gel (Hexane/EA 1:2, 1:3) afforded the **3w** (27.0 mg, 62%) as a yellow solid.

**3w**: Mp = 86–90 °C. TLC  $R_f$  (EA) = 0.41.  $^1\text{H}$  NMR (500 MHz,  $\text{CD}_3\text{OD}$ ):  $\delta$  6.20 (s, 1H), 5.74 (s, 1H), 4.45 (dd,  $J$  = 8.5, 5.0 Hz, 1H), 4.34–4.25 (m, 1H), 4.23 (d,  $J$  = 5.0 Hz, 2H), 3.92 (d,  $J$  = 4.5 Hz, 1H), 3.89 (t,  $J$  = 5.5 Hz, 1H), 3.75 (s, 1H), 3.68 (s, 3H), 3.62–3.51 (m, 1H), 3.30–3.16 (m, 2H), 3.04 (d,  $J$  = 16.0 Hz, 1H), 3.00 (d,  $J$  = 16.0 Hz, 1H), 2.59 (s, 3H), 2.52 (s, 3H), 2.34 (tt,  $J$  = 11.0, 3.5 Hz, 1H), 2.29–2.20 (m, 1H), 2.09 (s, 3H), 2.05–1.93 (m, 3H), 1.89 (dd,  $J$  = 13.0, 3.0 Hz, 1H), 1.79–1.69 (m, 3H), 1.68–1.52 (m, 4H), 1.46 (s, 6H), 1.43 (s, 9H), 1.37–1.21 (m, 5H).  $^{13}\text{C}$  NMR (125 MHz,  $\text{CD}_3\text{OD}$ ):  $\delta$  177.4, 174.0, 173.3, 160.0, 157.8, 155.9, 139.4, 134.2, 133.6, 132.6, 129.6, 126.1, 118.5, 87.8, 80.6, 78.9, 75.7, 64.5, 61.9, 60.4, 53.1, 52.8, 48.3, 44.2, 43.9, 42.0, 30.2, 30.1, 30.0, 29.8, 28.7, 26.9, 26.5, 26.4, 26.2, 26.0, 19.7, 18.5, 12.6. HRMS (ESI)  $m/z$ :  $[\text{M} + \text{H}]^+$  Calcd for  $\text{C}_{43}\text{H}_{66}\text{N}_5\text{O}_{12}\text{S}$  876.4423; Found 876.4424.  $[\alpha]_{\text{D}}^{20}$ :  $-12.8^\circ$  ( $c$  0.49,  $\text{CH}_3\text{OH}$ ).

### Product (3x)

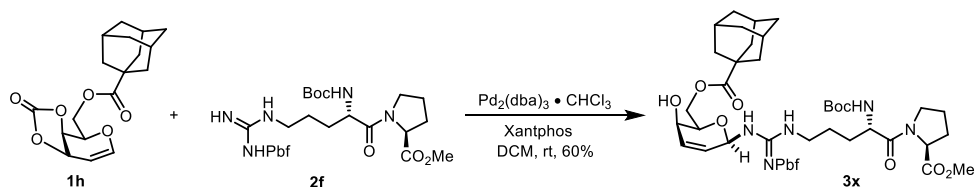

To a solution of **1h**<sup>4</sup> (50.1 mg, 0.15 mmol), **2f** (31.9 mg, 0.05 mmol),  $\text{Pd}_2(\text{dba})_3 \cdot \text{CHCl}_3$  (2.6 mg, 0.0025 mmol) and Xantphos (2.9 mg, 0.005 mmol) was added anhydrous DCM (4 mL) under an argon atmosphere. The mixture was stirred at room temperature for 2 h and then concentrated in vacuo. Purification of the residue through column chromatography on silica gel (Hexane/EA 1:2, 1:3) afforded the **3x** (27.6 mg, 60%) as a white solid.

**3x**: Mp = 109–114 °C. TLC  $R_f$  (EA) = 0.47.  $^1\text{H}$  NMR (500 MHz,  $\text{CD}_3\text{OD}$ ):  $\delta$  6.69 (d,  $J$  = 6.0 Hz, 1H), 6.20 (s, 1H), 5.71 (s, 1H), 5.35 (brs, 1H), 4.45 (dd,  $J$  = 9.0, 5.0 Hz, 1H), 4.34–4.24 (m, 1H), 4.21 (d,  $J$  = 4.5 Hz, 2H), 3.92 (d,  $J$  = 4.0 Hz, 1H), 3.89 (t,  $J$  = 6.0 Hz, 1H), 3.75 (s, 1H), 3.68 (s, 3H), 3.63–3.49 (m, 1H), 3.26–3.18 (m, 1H), 3.04 (d,  $J$  = 15.5 Hz, 1H), 3.00 (d,  $J$  = 15.5 Hz, 1H), 2.59 (s, 3H), 2.52 (s, 3H), 2.30–2.19 (m, 1H), 2.09 (s, 3H), 2.04–1.97 (m, 5H), 1.93–1.85 (m, 7H), 1.77 (d,  $J$  = 12.0 Hz, 3H), 1.72 (d,  $J$  = 12.0 Hz, 4H), 1.68–1.55 (m, 3H), 1.46 (s, 3H), 1.45 (s, 3H), 1.43 (s, 9H).  $^{13}\text{C}$  NMR (125 MHz,  $\text{CD}_3\text{OD}$ ):  $\delta$  178.9, 174.0, 173.3, 160.0, 157.8, 156.0, 139.4, 134.2, 133.6, 132.7, 129.6, 126.1, 118.5, 87.8, 80.6, 79.9, 75.6, 64.3, 61.9, 60.4, 53.1, 52.8, 48.3, 43.9, 42.0, 40.0, 37.5, 30.0, 29.8, 29.4, 28.7, 26.2, 26.0, 19.7, 18.5, 12.6. HRMS (ESI)  $m/z$ :  $[\text{M} + \text{H}]^+$  Calcd for  $\text{C}_{47}\text{H}_{70}\text{N}_5\text{O}_{12}\text{S}$  928.4736; Found 928.4744.  $[\alpha]_{\text{D}}^{20}$ :  $-5.5^\circ$  ( $c$  0.51,  $\text{CH}_3\text{OH}$ ).

### Product (3y)

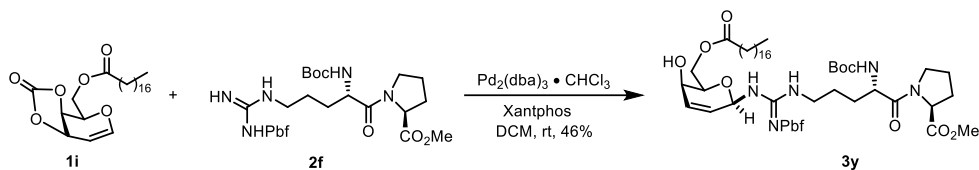

To a solution of **1i**<sup>4</sup> (65.7 mg, 0.15 mmol), **2f** (31.9 mg, 0.05 mmol),  $\text{Pd}_2(\text{dba})_3 \cdot \text{CHCl}_3$  (2.7 mg, 0.0026 mmol) and Xantphos (2.9 mg, 0.005 mmol) was added anhydrous DCM (4 mL) under an argon atmosphere. The mixture was stirred at room temperature for 2 h and then concentrated in vacuo. Purification of the residue through column chromatography on silica gel (Hexane/EA 1:2, 1:3) afforded the **3y** (23.6 mg, 46%) as a yellow solid.

**3y**: Mp = 48–53 °C. TLC  $R_f$  (EA) = 0.37. <sup>1</sup>H NMR (500 MHz,  $\text{CD}_3\text{OD}$ ):  $\delta$  6.19 (s, 1H), 5.71 (s, 1H), 4.45 (dd,  $J$  = 8.5, 5.0 Hz, 1H), 4.35–4.15 (m, 3H), 3.93 (d,  $J$  = 3.5 Hz, 1H), 3.89 (dd,  $J$  = 6.5, 6.5 Hz, 1H), 3.75 (s, 1H), 3.68 (s, 3H), 3.63–3.53 (m, 1H), 3.26 (s, 2H), 3.04 (d,  $J$  = 15.5 Hz, 1H), 3.00 (d,  $J$  = 15.5 Hz, 1H), 2.59 (s, 3H), 2.52 (s, 3H), 2.33 (t,  $J$  = 7.5 Hz, 2H), 2.29–2.20 (m, 1H), 2.09 (s, 3H), 2.05–1.89 (m, 3H), 1.79–1.69 (m, 1H), 1.68–1.54 (m, 5H), 1.46 (s, 6H), 1.43 (s, 9H), 1.33–1.26 (m, 28H), 0.90 (t,  $J$  = 7.0 Hz, 3H). <sup>13</sup>C NMR (125 MHz,  $\text{CD}_3\text{OD}$ ):  $\delta$  175.2, 174.0, 173.3, 160.0, 157.8, 155.9, 139.5, 134.23, 134.20, 133.6, 132.5, 129.8, 126.1, 118.5, 87.8, 80.6, 78.8, 75.8, 64.7, 62.0, 60.4, 53.1, 52.8, 48.3, 43.9, 42.1, 34.9, 33.1, 30.81, 30.79, 30.75, 30.63, 30.62, 30.50, 30.48, 30.44, 30.42, 30.2, 30.0, 29.8, 28.8, 26.1, 26.00, 25.98, 23.8, 19.71, 19.68, 18.5, 14.50, 14.46, 12.62, 12.58. HRMS (ESI)  $m/z$ :  $[\text{M} + \text{H}]^+$  Calcd for  $\text{C}_{54}\text{H}_{90}\text{N}_5\text{O}_{12}\text{S}$  1032.6301; Found 1032.6352.  $[\alpha]_D^{20}$ :  $-13.4^\circ$  ( $c$  0.42,  $\text{CH}_3\text{OH}$ ).

### Product (3z)

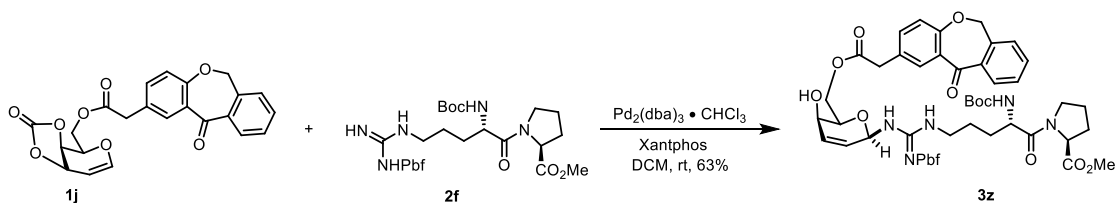

To a solution of **1j**<sup>4</sup> (63.3 mg, 0.15 mmol), **2f** (31.8 mg, 0.05 mmol),  $\text{Pd}_2(\text{dba})_3 \cdot \text{CHCl}_3$  (2.7 mg, 0.0026 mmol) and Xantphos (2.9 mg, 0.005 mmol) was added anhydrous DCM (4 mL) under an argon atmosphere. The mixture was stirred at room temperature for 1 h and then concentrated in vacuo. Purification of the residue through column chromatography on silica gel (Hexane/EA 1:3 then EA), concentration and then further purification by a big TLC (EA) afforded the **3z** (31.8 mg, 63%) as a white solid.

**3z**: Mp = 110–113 °C. TLC  $R_f$  (EA) = 0.33. <sup>1</sup>H NMR (500 MHz,  $\text{CD}_3\text{OD}$ ):  $\delta$  8.06 (s, 1H), 7.83 (dd,  $J$  = 7.5, 1.0 Hz, 1H), 7.61 (td,  $J$  = 7.5, 1.0 Hz, 1H), 7.49 (dd,  $J$  = 7.5, 1.0 Hz, 1H), 7.48–7.35 (m, 2H), 7.01 (d,  $J$  = 8.5 Hz, 1H), 6.17 (s, 1H), 5.69 (s, 1H), 5.38 (brs, 1H), 5.21 (s, 2H), 4.43 (dd,  $J$  = 8.5, 4.5 Hz, 1H), 4.38–4.18 (m, 3H), 3.91 (s, 2H), 3.78–3.62 (m, 3H), 3.65

(s, 3H), 3.55 (brs, 1H), 3.24 (t,  $J = 6.5$  Hz, 1H), 2.96 (s, 2H), 2.58 (s, 3H), 2.50 (s, 3H), 2.28-2.15 (m, 1H), 2.07 (s, 3H), 2.02-1.82 (m, 3H), 1.78-1.52 (m, 4H), 1.40 (s, 15H).  $^{13}\text{C}$  NMR (125 MHz,  $\text{CD}_3\text{OD}$ ):  $\delta$  192.3, 174.0, 173.3, 173.0, 162.0, 160.0, 157.8, 155.9, 141.6, 139.5, 137.9, 137.6, 134.21, 134.17, 133.6, 133.2, 130.3, 130.2, 129.5, 129.2, 126.3, 126.1, 122.1, 118.5, 87.8, 80.6, 78.9, 75.8, 74.6, 65.3, 62.0, 60.4, 53.1, 52.8, 48.3, 43.9, 42.1, 40.7, 29.9, 29.8, 28.72, 28.69, 26.2, 26.0, 19.7, 18.5, 12.6. HRMS (ESI)  $m/z$ :  $[\text{M} + \text{H}]^+$  Calcd for  $\text{C}_{52}\text{H}_{66}\text{N}_5\text{O}_{14}\text{S}$  1016.4321; Found 1016.4360.  $[\alpha]_{\text{D}}^{20}$ :  $-11.4^\circ$  ( $c$  0.34,  $\text{CH}_3\text{OH}$ ).

### Product (3aa)

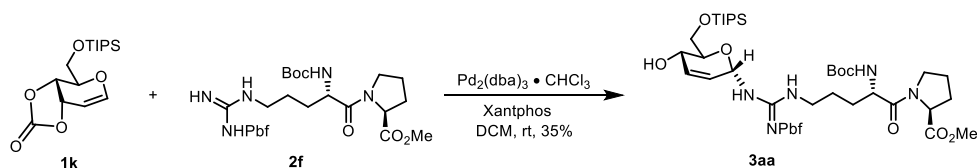

To a solution of **1k**<sup>1</sup> (49.3 mg, 0.15 mmol), **2f** (31.9 mg, 0.05 mmol),  $\text{Pd}_2(\text{dba})_3 \cdot \text{CHCl}_3$  (2.6 mg, 0.0025 mmol) and Xantphos (2.9 mg, 0.005 mmol) was added anhydrous DCM (4 mL) under an argon atmosphere. The mixture was stirred at room temperature for 24 h and then concentrated in vacuo. Purification of the residue through column chromatography on silica gel (Hexane/EA 1:1, 1:2) afforded the **3aa** (16.2 mg, 35%) as a yellow solid.

**3aa**: Mp = 68–70 °C. TLC  $R_f$  (EA) = 0.70.  $^1\text{H}$  NMR (500 MHz,  $\text{CD}_3\text{OD}$ ):  $\delta$  6.07 (d,  $J = 10.0$  Hz, 1H), 5.76 (d,  $J = 10.0$  Hz, 1H), 5.44 (brs, 1H), 4.47 (dd,  $J = 9.0, 4.5$  Hz, 1H), 4.29 (t,  $J = 6.5$  Hz, 1H), 4.03 (d,  $J = 8.5$  Hz, 1H), 3.90 (dd,  $J = 11.5, 1.5$  Hz, 1H), 3.86-3.75 (m, 2H), 3.69 (s, 3H), 3.66-3.57 (m, 1H), 3.47-3.35 (m, 2H), 3.19-3.09 (m, 1H), 3.04 (d,  $J = 15.5$  Hz, 1H), 3.00 (d,  $J = 15.5$  Hz, 1H), 2.59 (s, 3H), 2.51 (s, 3H), 2.33-2.21 (m, 1H), 2.09 (s, 3H), 2.06-1.99 (m, 2H), 1.97-1.91 (m, 1H), 1.76-1.68 (m, 1H), 1.68-1.55 (m, 3H), 1.47 (s, 3H), 1.45 (s, 3H), 1.43 (s, 9H), 1.12-1.07 (m, 5H), 1.06 (s, 9H), 1.06-1.02 (m, 7H).  $^{13}\text{C}$  NMR (125 MHz,  $\text{CD}_3\text{OD}$ ):  $\delta$  174.1, 173.4, 160.0, 157.9, 156.1, 139.4, 137.1, 134.1, 133.5, 126.2, 125.2, 118.6, 87.8, 80.6, 75.9, 74.7, 64.4, 63.5, 60.4, 53.3, 52.8, 48.3, 43.9, 42.1, 30.0, 29.9, 28.7, 26.5, 26.0, 19.8, 18.6, 18.5, 13.2, 12.6. HRMS (ESI)  $m/z$ :  $[\text{M} + \text{H}]^+$  Calcd for  $\text{C}_{45}\text{H}_{76}\text{N}_5\text{O}_{11}\text{SSi}$  922.5026; Found 922.5038.  $[\alpha]_{\text{D}}^{20}$ :  $-26.1^\circ$  ( $c$  0.29,  $\text{CH}_3\text{OH}$ ).

## 2.3 Derivation

### Product (4)

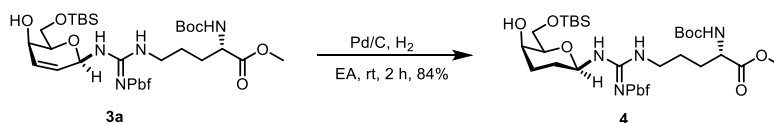

To a solution of **3a** (39.1 mg, 0.05 mmol) in EA (2 mL) was added Pd/C (10.6 mg, 10% on dry basis, 0.01 mmol) and bubbled by  $\text{H}_2$  (1.0 atm) for 5 min. The reaction mixture was stirred at room temperature under balloon pressure gas of  $\text{H}_2$

(1.0 atm) for 2 h. The mixture was filtered through celite by washing with EA, concentrated and purified by column chromatography (Hexane/EA 1:1.5, 1:2) to give **4** (33.0 mg, 84% yield) as a white solid.

**4**: Mp = 65–68 °C. TLC  $R_f$  (Hexane/EA 1:1) = 0.16.  $^1\text{H}$  NMR (500 MHz,  $\text{CD}_3\text{OD}$ ):  $\delta$  4.71 (brs, 1H), 4.04 (d,  $J$  = 7.5 Hz, 1H), 3.78 (dd,  $J$  = 10.0, 6.0 Hz, 1H), 3.74 (s, 2H), 3.68 (s, 3H), 3.60 (s, 1H), 3.29–3.15 (m, 2H), 3.00 (s, 2H), 2.58 (s, 3H), 2.51 (s, 3H), 2.08 (s, 3H), 2.00–1.84 (m, 2H), 1.83–1.68 (m, 2H), 1.65–1.51 (m, 4H), 1.46 (s, 3H), 1.45 (s, 3H), 1.44 (s, 9H), 0.90 (s, 9H), 0.083 (s, 3H), 0.076 (s, 3H).  $^{13}\text{C}$  NMR (125 MHz,  $\text{CD}_3\text{OD}$ ):  $\delta$  174.6, 159.9, 158.0, 156.0, 139.4, 134.1, 133.4, 126.1, 118.5, 87.7, 81.3, 80.6, 79.8, 64.5, 63.9, 54.8, 52.6, 43.9, 41.8, 31.0, 29.9, 28.7, 27.2, 26.43, 26.39, 26.0, 19.7, 19.2, 18.5, 12.6, -5.1, -5.2. HRMS (ESI)  $m/z$ :  $[\text{M} + \text{H}]^+$  Calcd for  $\text{C}_{37}\text{H}_{65}\text{N}_4\text{O}_{10}\text{SSi}$  785.4185; Found 785.4220.  $[\alpha]_{\text{D}}^{20}$ : -32.0° ( $c$  0.60,  $\text{CH}_3\text{OH}$ ).

### Product (5a)

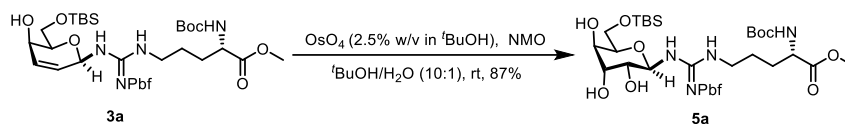

To a reaction tube was added **3a** (156.4 mg, 0.2 mmol), NMO (23.3 mg, 0.2 mmol),  $t\text{BuOH}$  (880  $\mu\text{L}$ ) and water (88  $\mu\text{L}$ ). Put the tube to an ice bath, then add the  $\text{OsO}_4$  (2.5% w/v in  $t\text{BuOH}$ , 14  $\mu\text{L}$ ). The mixture was stirred at 0 °C for 1 h and then warmed to room temperature for overnight. It was quenched with  $\text{Na}_2\text{SO}_3$  aqueous and extracted with EA for 3 times, combined organic phase and sequentially wash with water and brine, then dried over anhydrous sodium sulphate, filtered, concentrated and purified by column chromatography (Hexane/EA 1:3, 1:5 then EA) to give **5a** (142.2 mg, 87% yield) as a white solid.

**5a**: Mp = 94–96 °C. TLC  $R_f$  (EA) = 0.46.  $^1\text{H}$  NMR (500 MHz,  $\text{CDCl}_3$ ):  $\delta$  7.71 (brs, 1H), 6.10 (brs, 1H), 5.24 (d,  $J$  = 5.5 Hz, 1H), 4.82 (brs, 1H), 4.38 (brs, 1H), 4.21 (d,  $J$  = 4.0 Hz, 1H), 4.15 (s, 1H), 4.01 (d,  $J$  = 7.0 Hz, 1H), 3.96 (s, 2H), 3.84 (s, 3H), 3.69 (s, 3H), 3.22 (s, 2H), 2.95 (s, 2H), 2.55 (s, 3H), 2.48 (s, 3H), 2.08 (s, 3H), 1.82–1.68 (m, 1H), 1.66–1.50 (m, 3H), 1.45 (s, 6H), 1.42 (m, 9H).  $^{13}\text{C}$  NMR (125 MHz,  $\text{CDCl}_3$ ):  $\delta$  173.3, 171.3, 159.0, 155.7, 138.7, 132.7, 132.5, 124.7, 117.6, 86.6, 81.0, 80.2, 73.3, 70.7, 67.3, 64.2, 60.5, 53.3, 52.5, 43.3, 41.1, 30.0, 28.7, 28.5, 26.0, 25.7, 19.4, 18.4, 18.1, 14.3, 12.6, -5.31, -5.33. HRMS (ESI)  $m/z$ :  $[\text{M} + \text{H}]^+$  Calcd for  $\text{C}_{37}\text{H}_{65}\text{N}_4\text{O}_{12}\text{SSi}$  817.4083; Found 817.4112.  $[\alpha]_{\text{D}}^{20}$ : -27.3° ( $c$  0.18,  $\text{CH}_3\text{OH}$ ).

### Product (6)

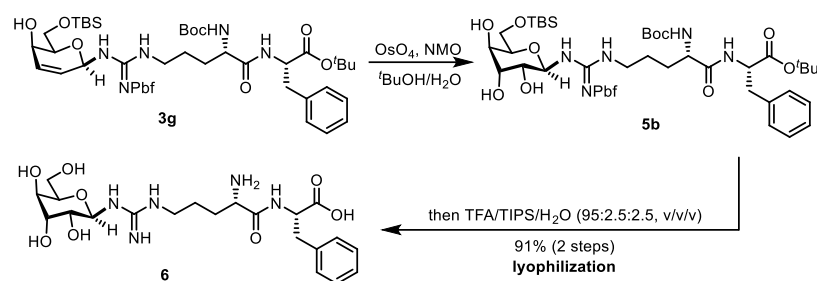

To a reaction tube was added **3g** (44.8 mg, 0.046 mmol), NMO (5.7 mg, 0.048 mmol), *t*BuOH (406  $\mu$ L) and water (40.6  $\mu$ L). Put the tube to an ice bath, then add the OsO<sub>4</sub> (2.5% w/v in *t*BuOH, 3.2  $\mu$ L). The mixture was stirred at 0 °C for 1 h and then warmed to room temperature for overnight. It was quenched with Na<sub>2</sub>SO<sub>3</sub> aqueous and extracted with EA for 3 times, combined organic phase and sequentially wash with water and brine, then dried over anhydrous sodium sulphate, filtered, concentrated. The crude product was not purified and directly used in next step.

To the vial with crude **5b** was added water (50  $\mu$ L), TFA (1.9 mL) and TIPS (50  $\mu$ L). The mixture was stirred at room temperature for 30 min. The TFA was blown away with air. The residue was dissolved with CH<sub>3</sub>CN/H<sub>2</sub>O (1/8, v/v) and then filtered. The filtrate was purified by HPLC and then lyophilized to give **6** (20.3 mg, 91% yield over 2 steps) as a white foam. HPLC for separation: retention time = 5.0 min (4.5 mL/min, 15% to 40% CH<sub>3</sub>CN over 20 min, Higgins Analytical Proto, 250  $\times$  10 mm, C18 5  $\mu$ m column). Analytic HPLC: retention time = 8.1 min (0.6 mL/min, 15% to 45% CH<sub>3</sub>CN over 20 min, Higgins Clipseus C18 5  $\mu$ m column, 250  $\times$  4 mm).

Compound **6** completely dissolves in CD<sub>3</sub>OD, however, the peak of anomeric proton (H<sub>C1</sub>) of compound **6** was partially overlapped by water peak, and the coupling constant could not be determined. We removed the CD<sub>3</sub>OD and partially re-dissolved **6** in CD<sub>3</sub>CN due to the solubility issue. <sup>1</sup>H NMR and COSY (see Page S78-S80) were used to determine and assign H<sub>C1</sub> and H<sub>C2</sub> peaks. The observed large coupling constant of *J*<sub>aa</sub> = 9.0 Hz indicates that H<sub>C1</sub> and H<sub>C2</sub> are in anti-geometry on the pyranose where adapts near 180 degree dihedral angle.<sup>5</sup> Overall, the stereochemistry of dihydroxylation can be determined as OsO<sub>4</sub> approaches from less sterically demanding convex face.

**6**: <sup>1</sup>H NMR (500 MHz, CD<sub>3</sub>OD):  $\delta$  7.35-7.15 (m, 5H), 4.85 (s, 1H), 4.73 (dd, *J* = 9.5, 5.0 Hz, 1H), 4.04 (dd, *J* = 7.5, 4.5 Hz, 1H), 3.97 (t, *J* = 3.5 Hz, 1H), 3.89 (t, *J* = 6.0 Hz, 1H), 3.83-3.77 (m, 1H), 3.77-3.72 (m, 2H), 3.69 (dd, *J* = 11.5, 4.0 Hz, 1H), 3.30-3.23 (m, 3H), 3.01 (dd, *J* = 14.0, 9.5 Hz, 1H), 1.93 (dd, *J* = 15.5, 8.0 Hz, 2H), 1.82-1.63 (m, 2H). <sup>13</sup>C NMR (125 MHz, CD<sub>3</sub>OD):  $\delta$  174.5, 170.0, 158.4, 138.3, 130.2, 129.6, 128.0, 80.9, 75.6, 72.4, 71.1, 68.4, 62.9, 55.5, 53.7, 42.1, 38.0, 29.7, 24.5. HRMS (ESI) *m/z*: [M + H]<sup>+</sup> Calcd for C<sub>21</sub>H<sub>34</sub>N<sub>5</sub>O<sub>8</sub> 484.2402; Found 484.2439. [ $\alpha$ ]<sub>D</sub><sup>20</sup>: -15.8° (*c* 0.095, CH<sub>3</sub>OH).

### 3 References

- (1) Dai, Y.; Zheng, J.; Zhang, Q. *Org. Lett.* **2018**, *20*, 3923.
- (2) Ward, D. J.; Van de Langemheen, H.; Koehne, E.; Kreidenweiss, A.; Liskamp, R. M. J. *Bioorg. Med. Chem.* **2019**, *27*, 2857.
- (3) Grogg, M.; Hilvert, D.; Beck, A. K.; Seebach, D. *Synthesis* **2019**, *51*, 31.
- (4) Dai, Y.; Tian, B.; Chen, H.; Zhang, Q. *ACS Catal.* **2019**, *9*, 2909.
- (5) Altona, C.; Haasnoot, C. A. G. *Org. Magn. Reson.* **1980**, *13*, 417.

# 4 $^1\text{H}$ and $^{13}\text{C}$ NMR spectra

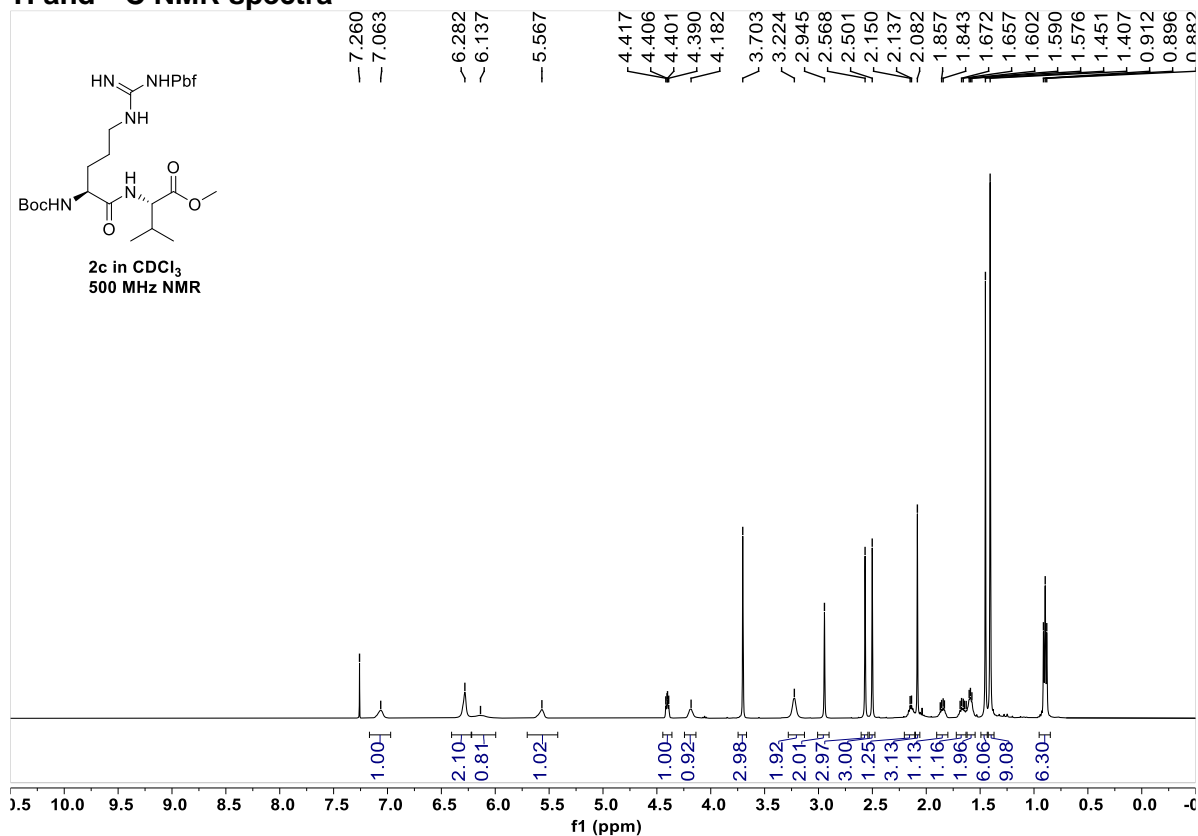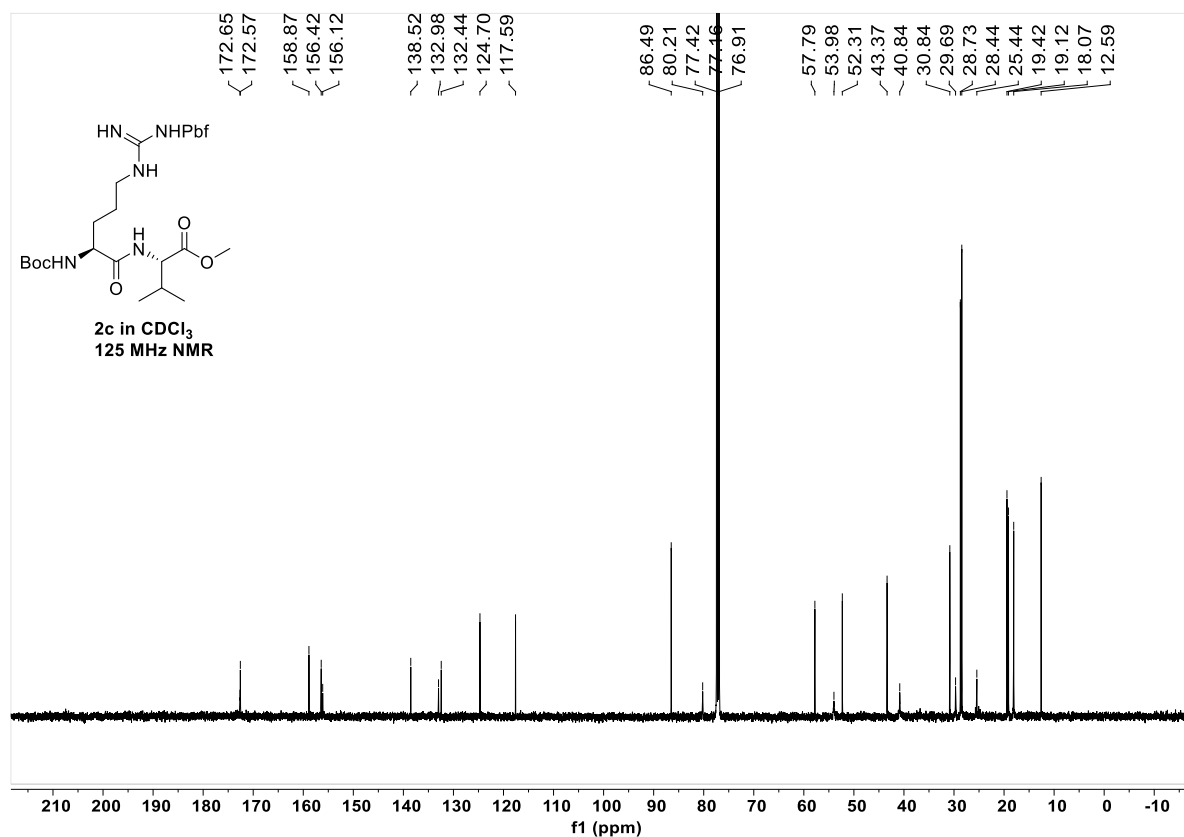

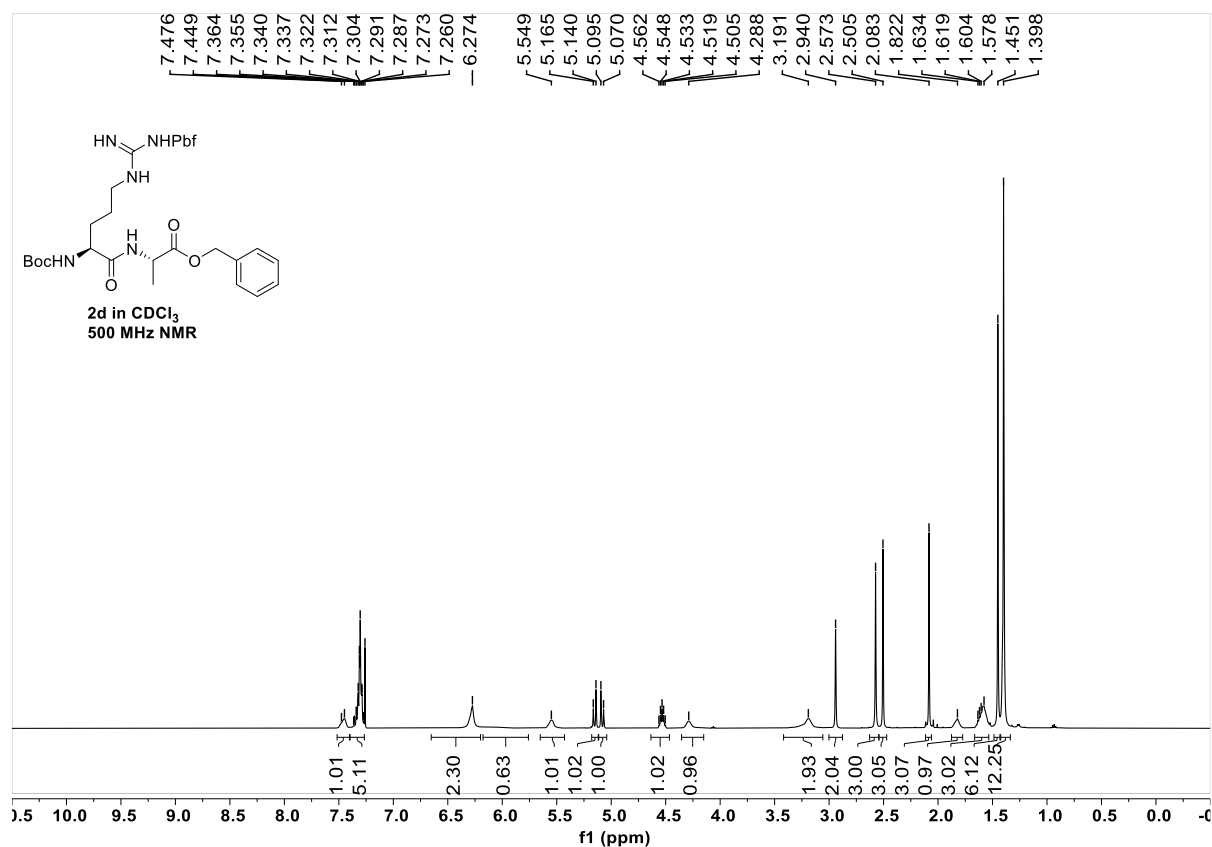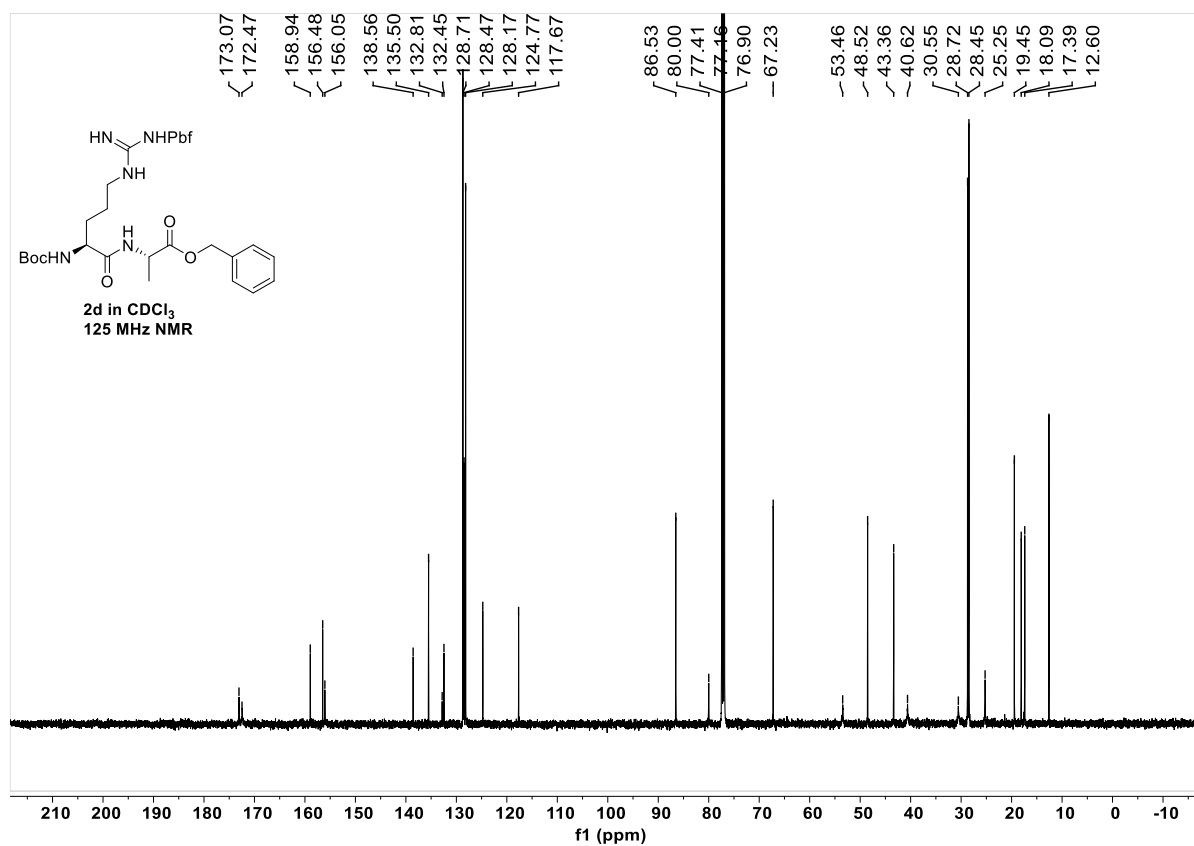

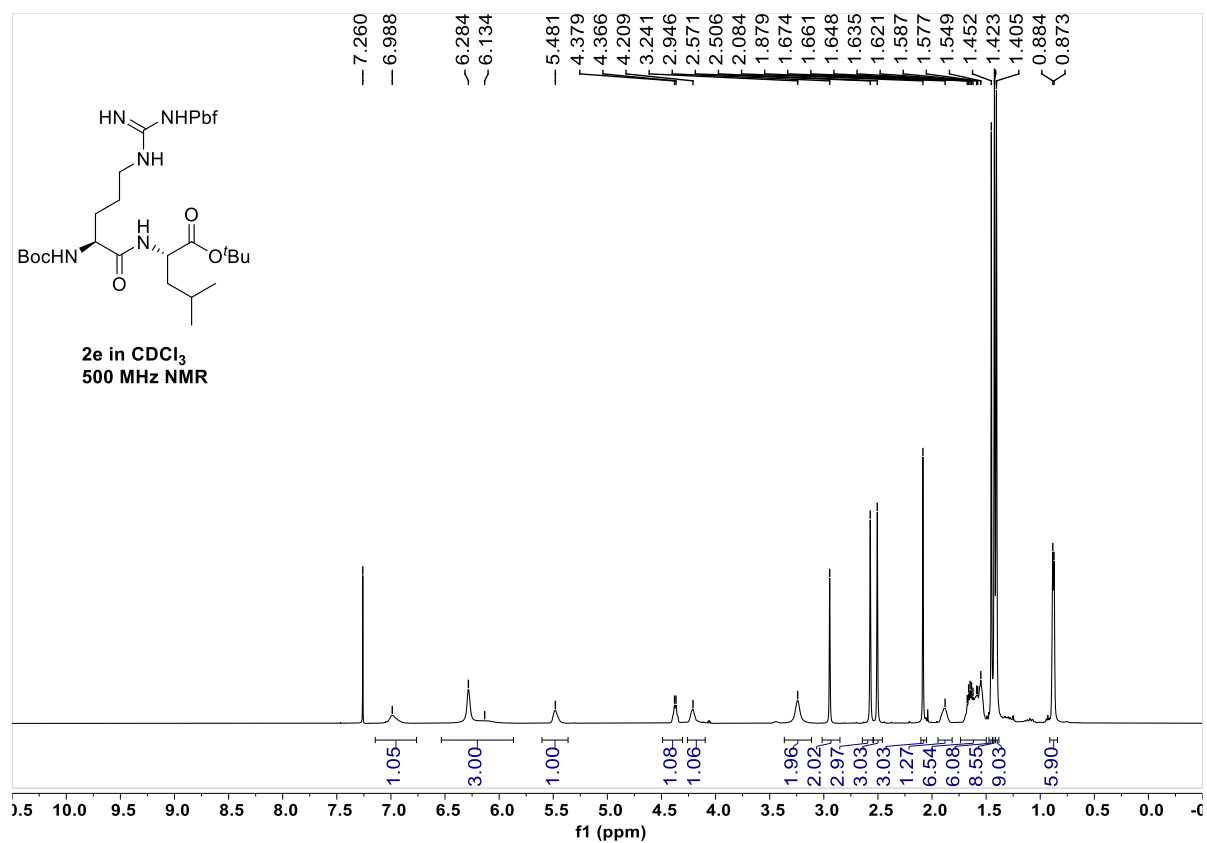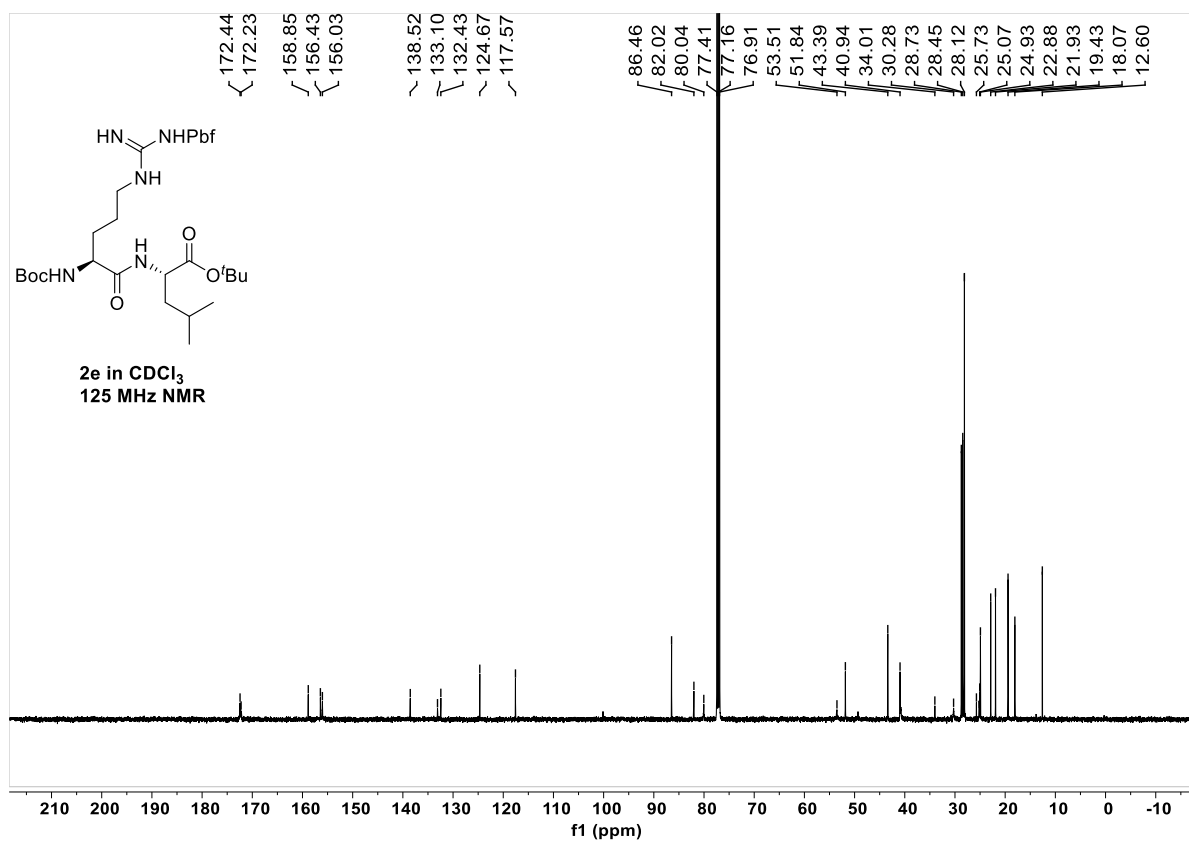

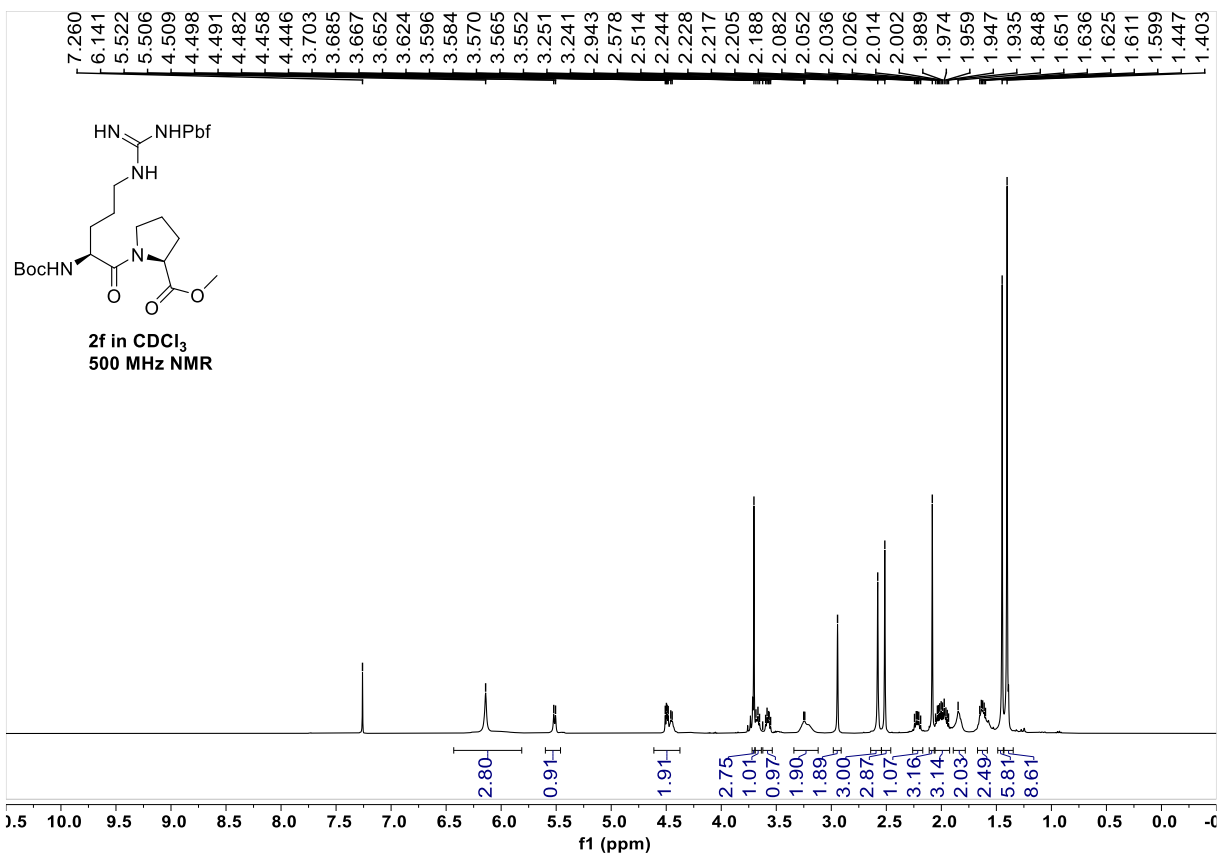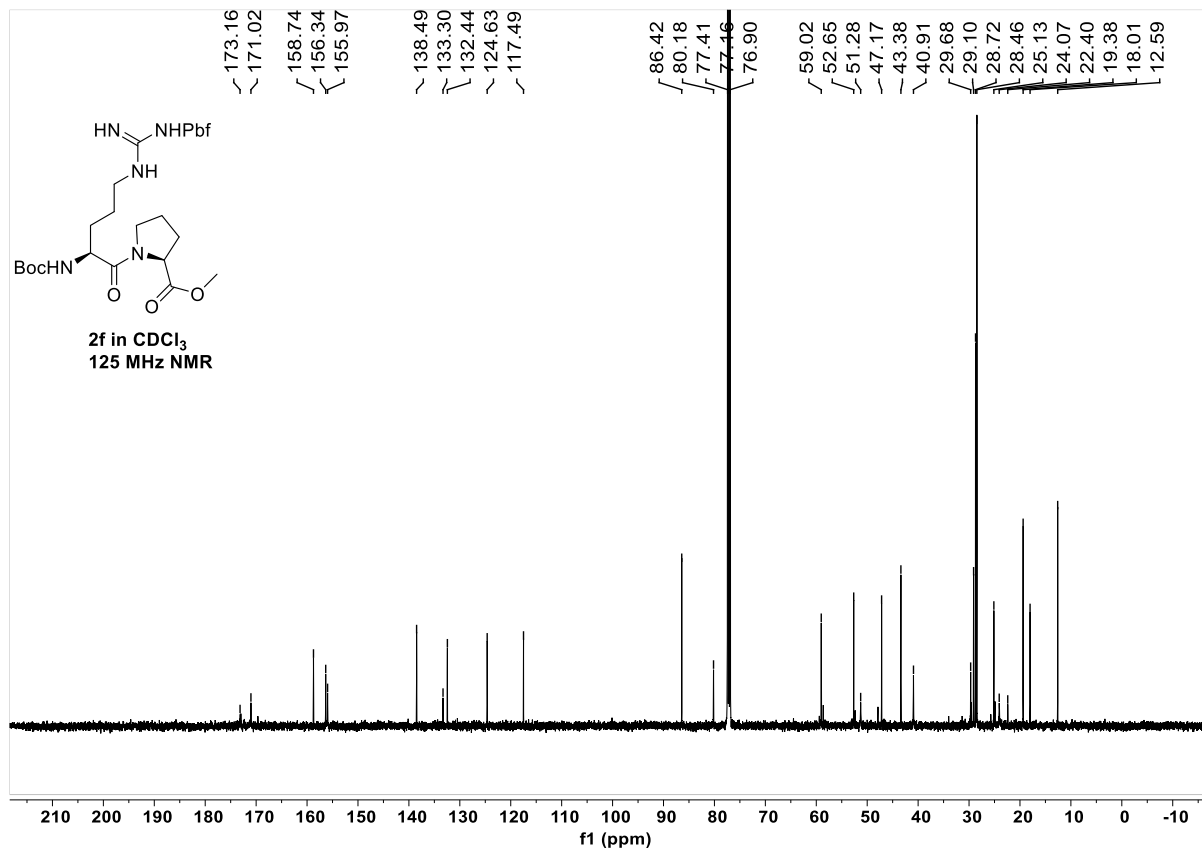

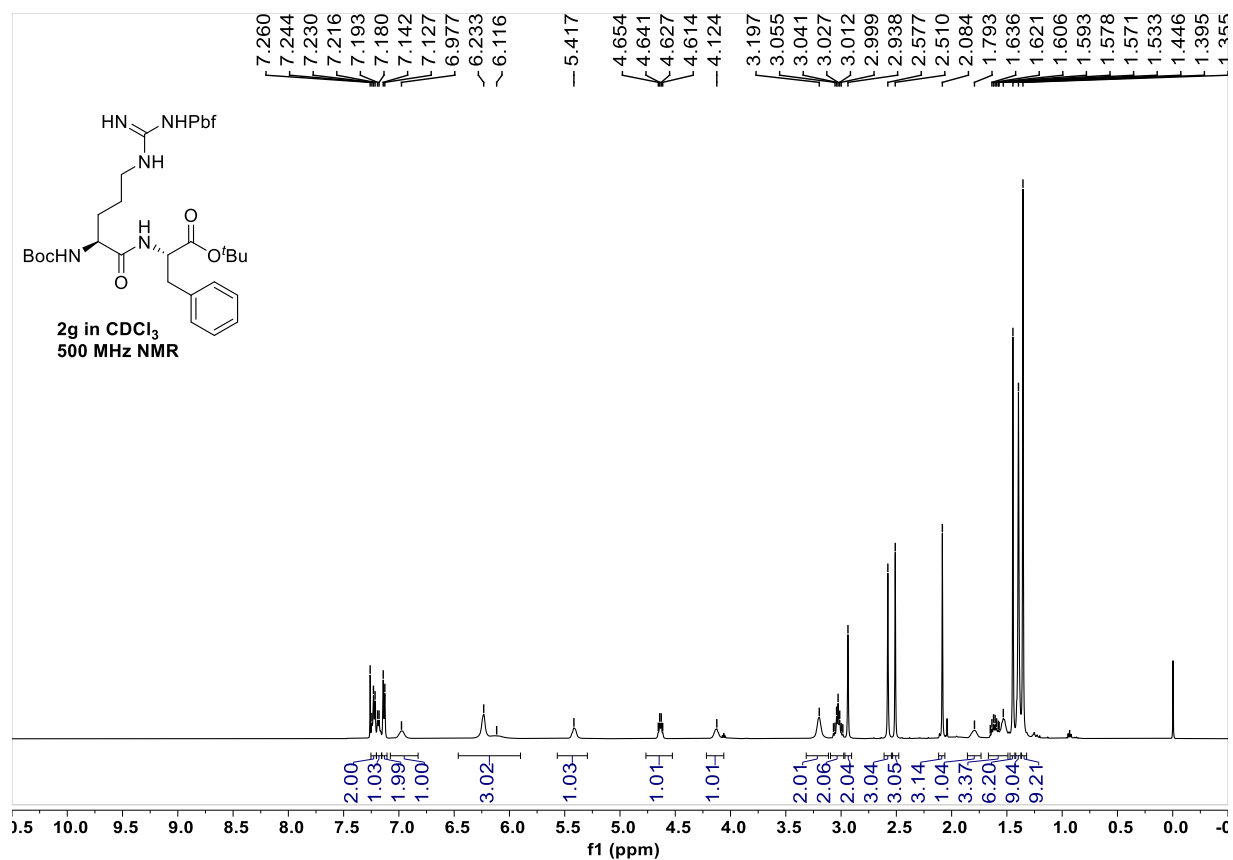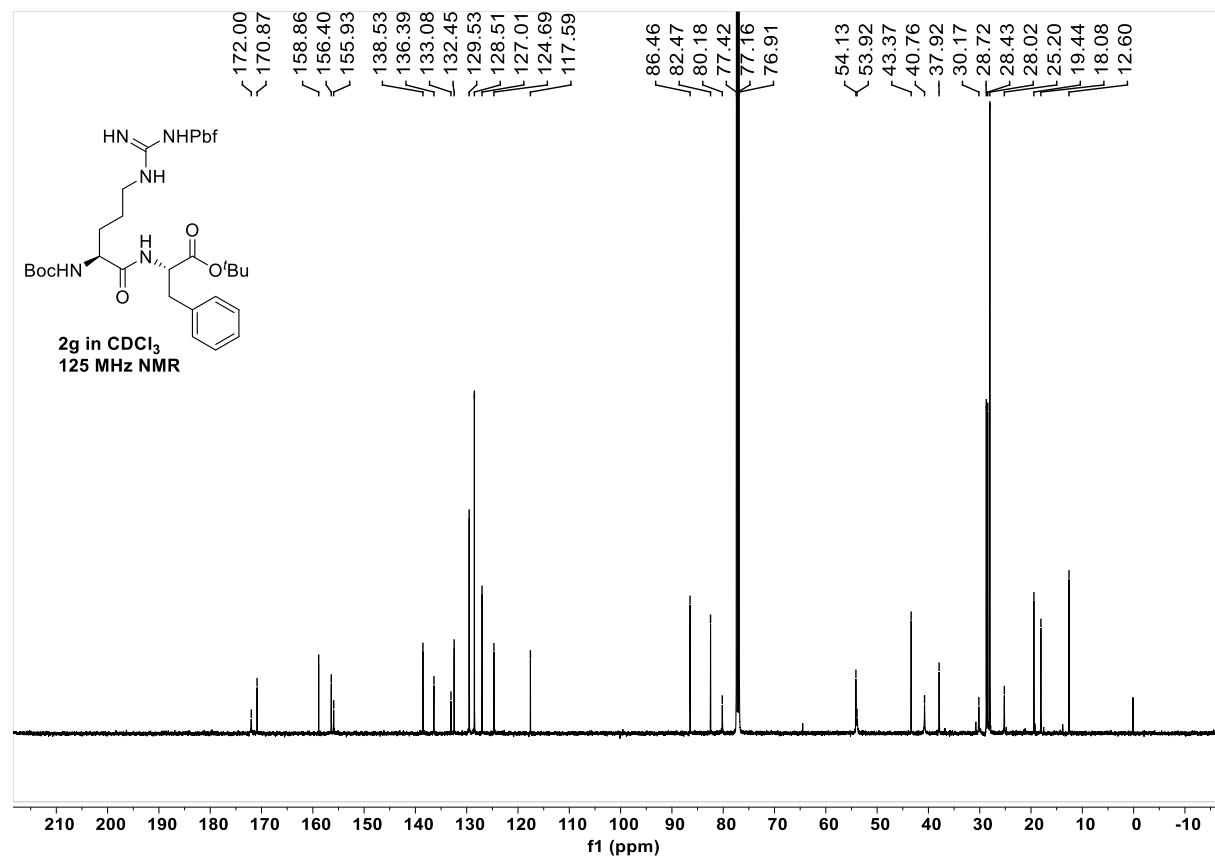

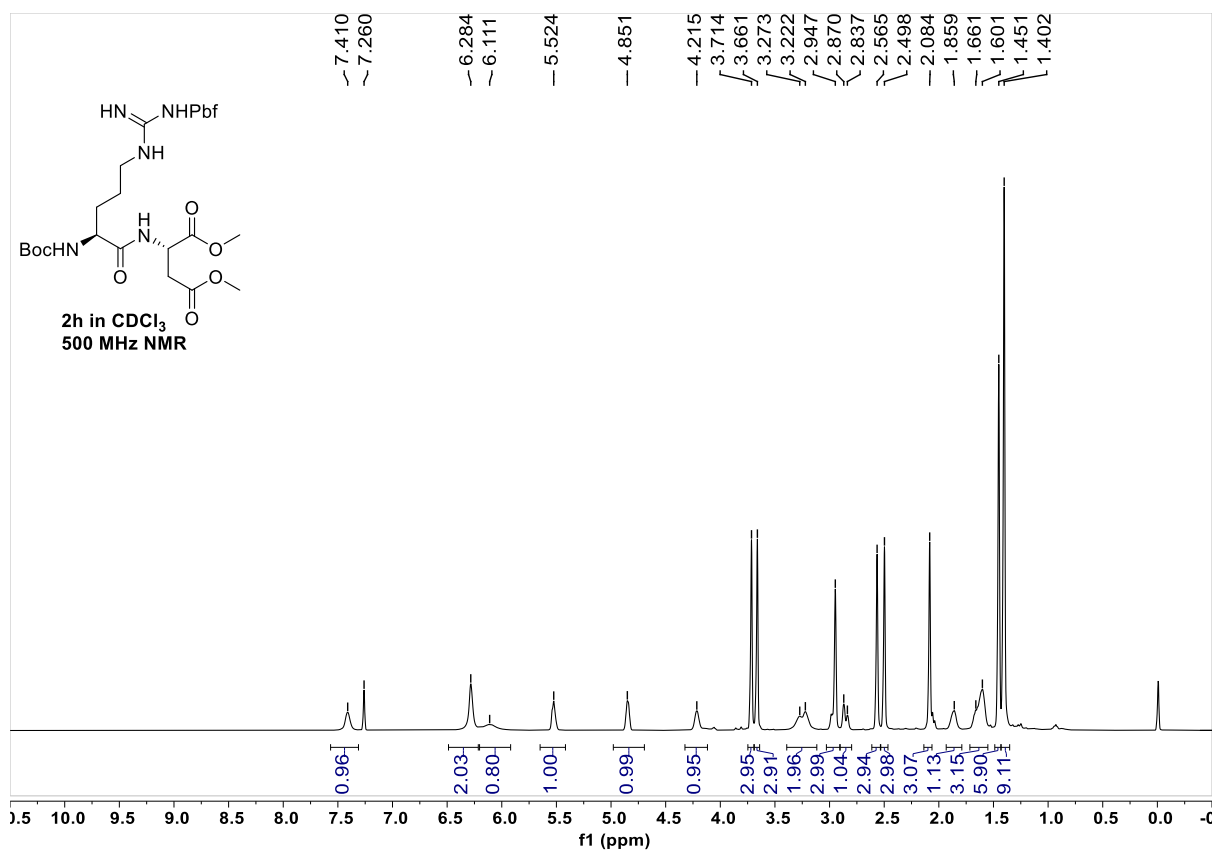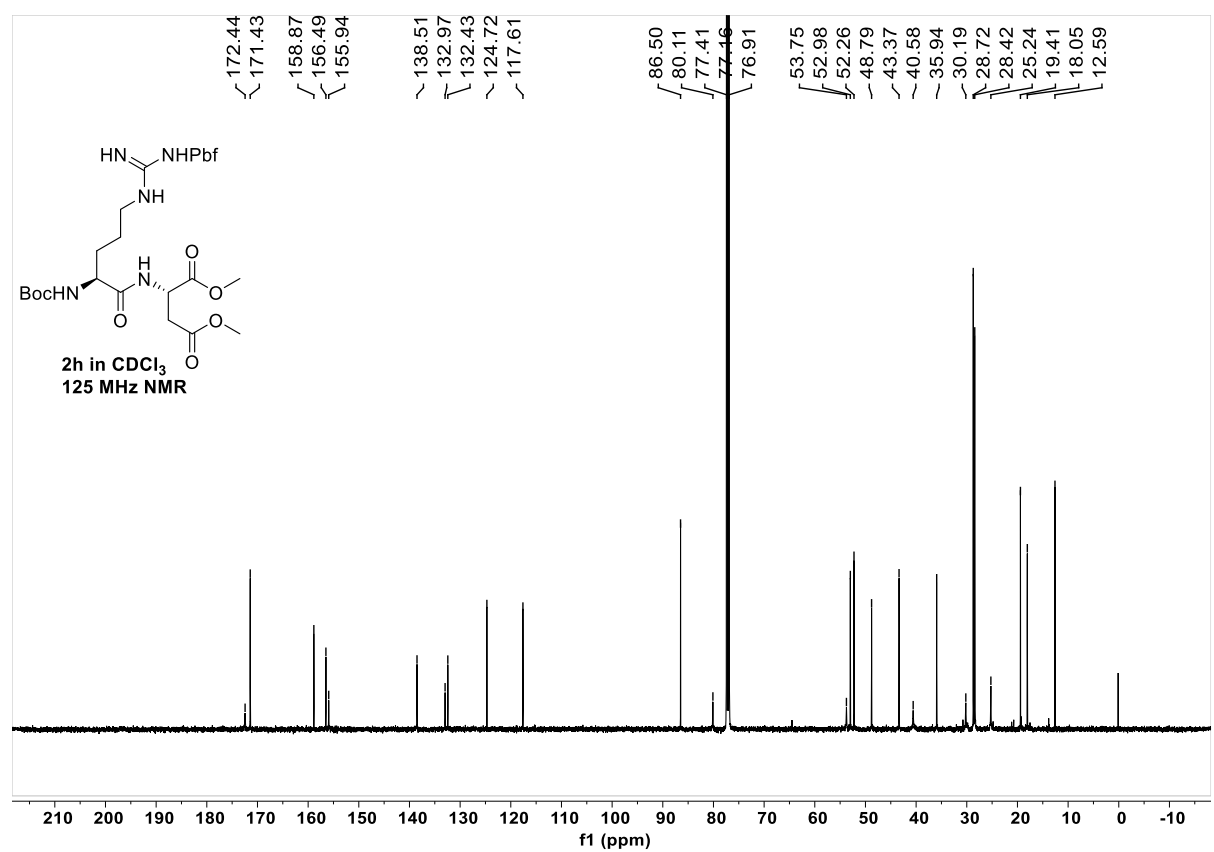

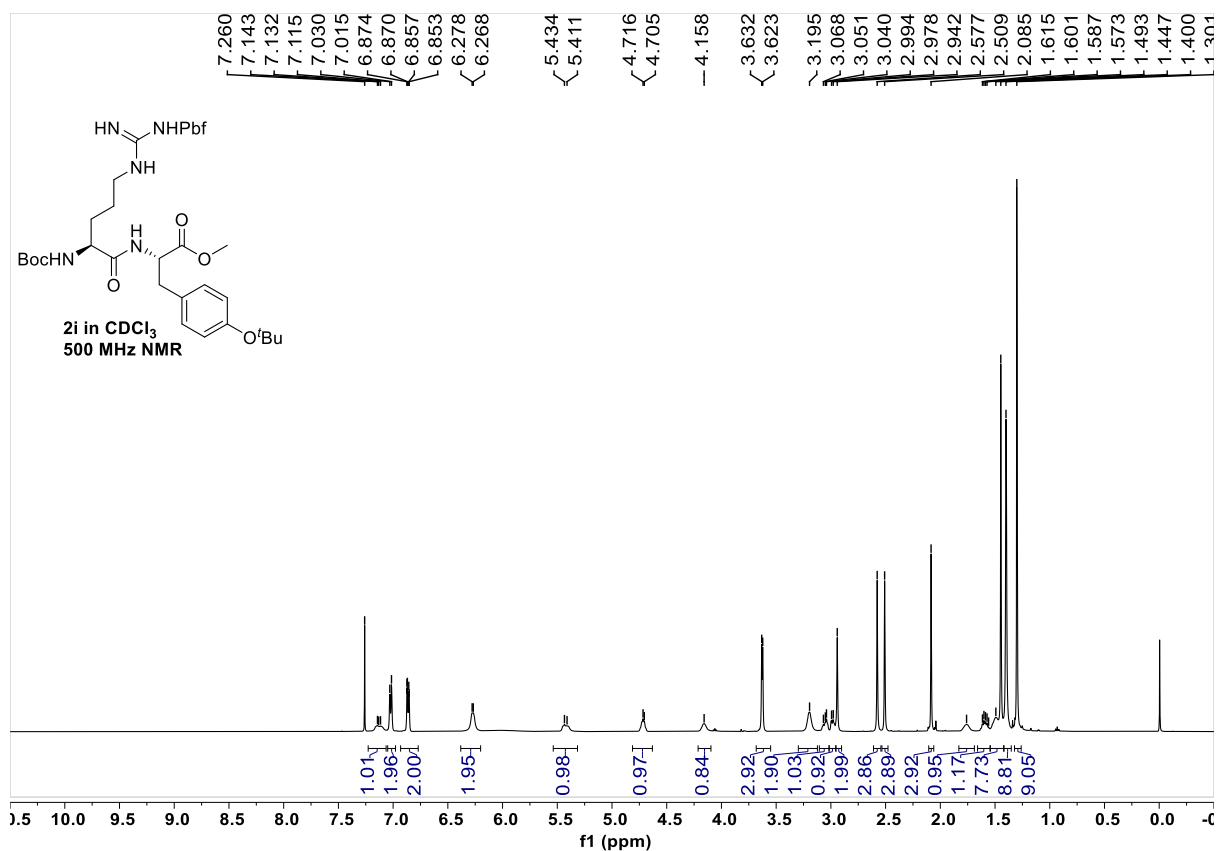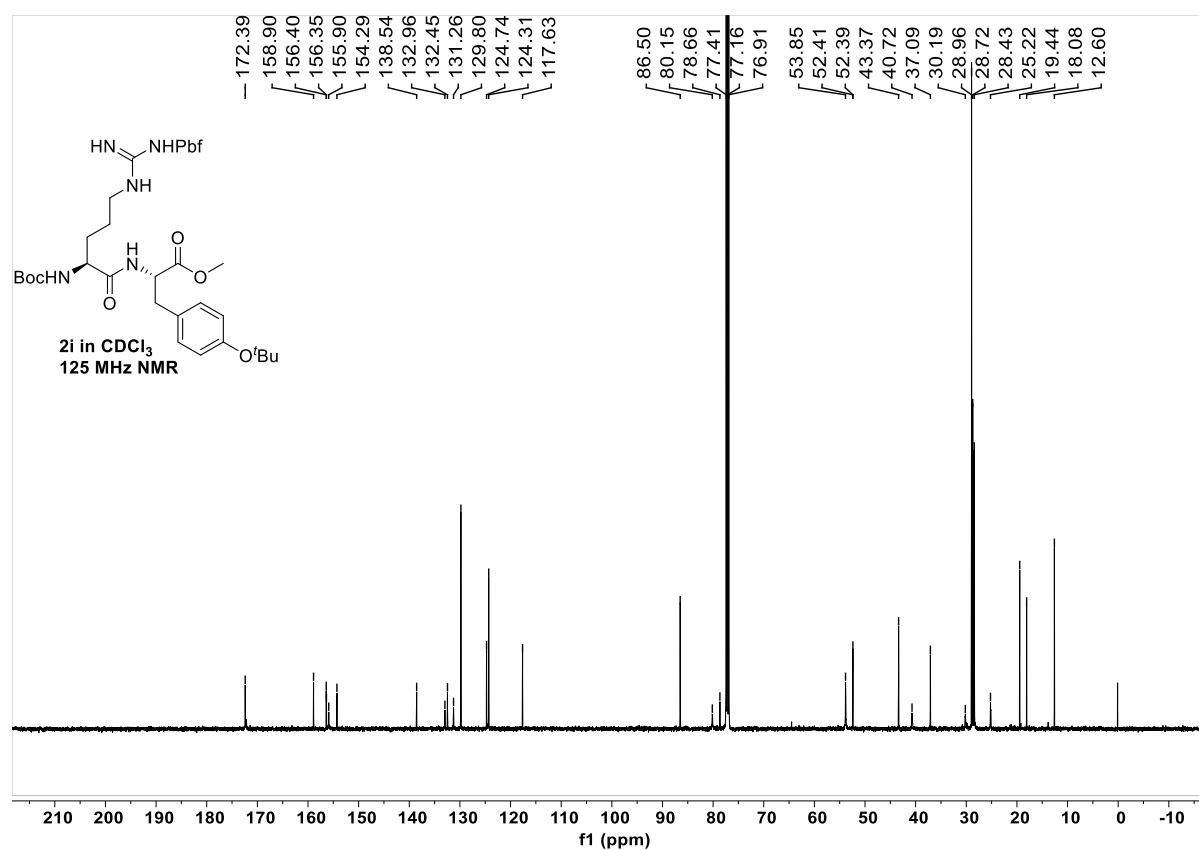

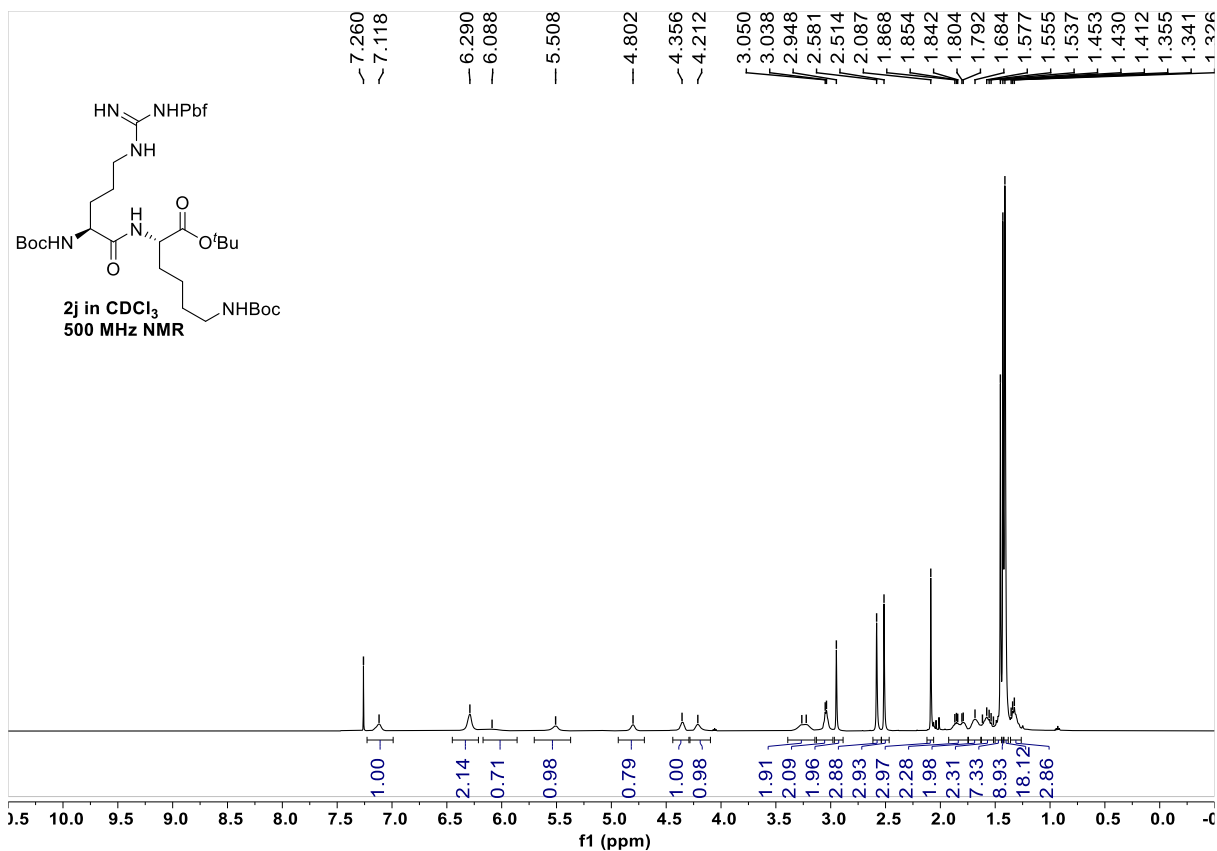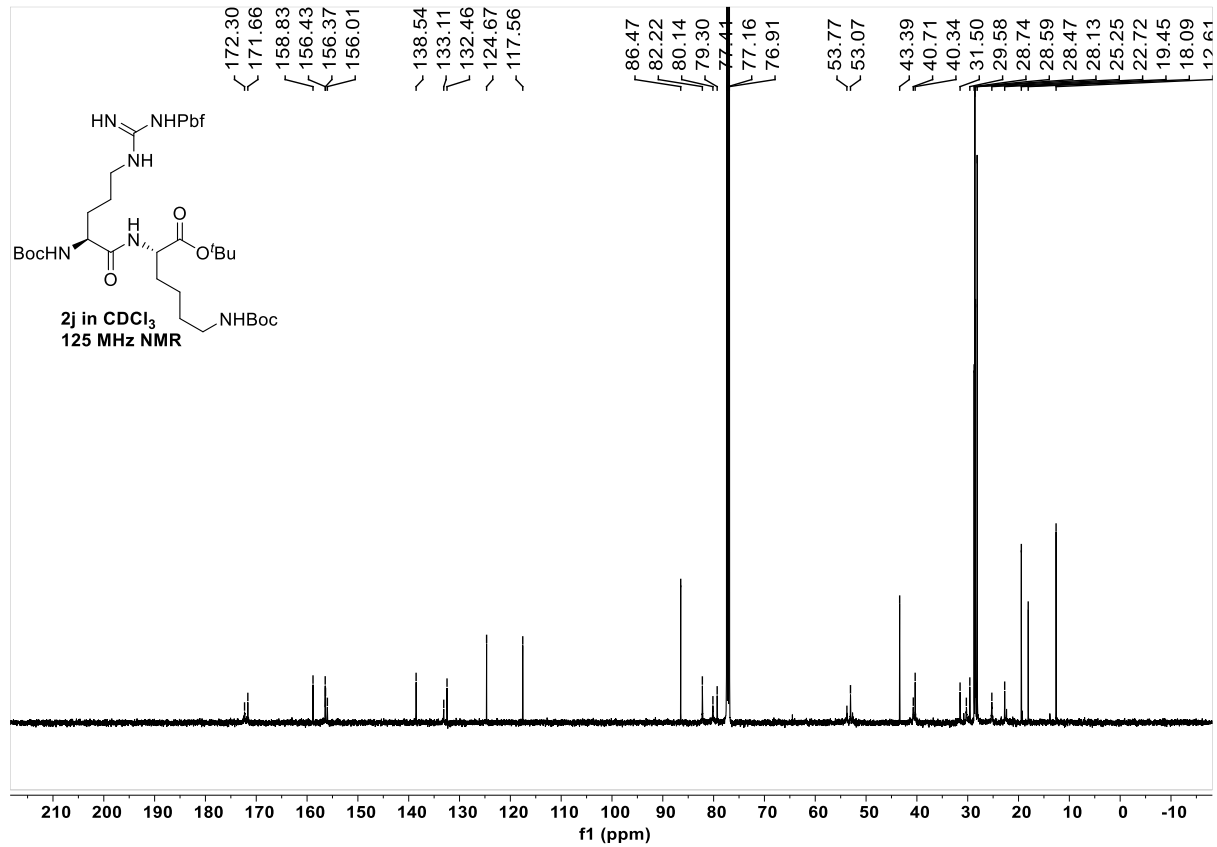

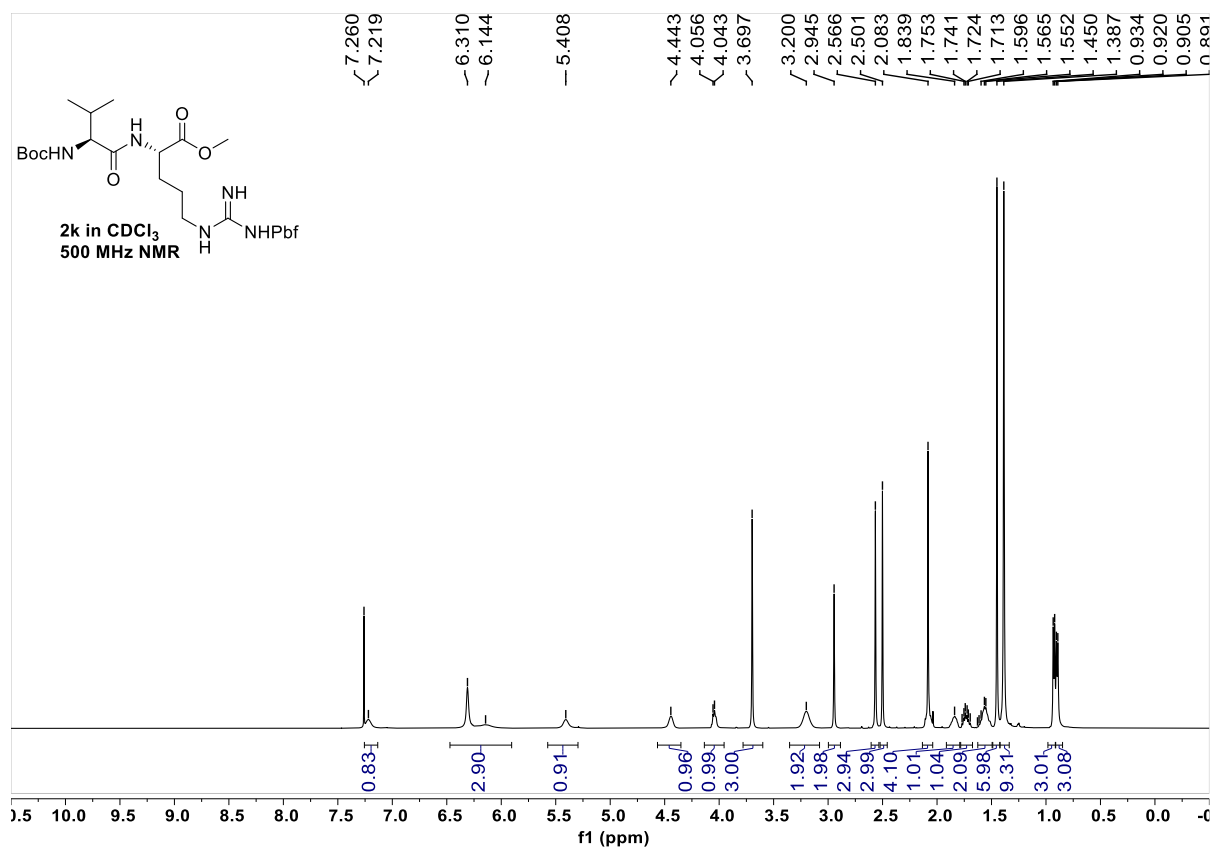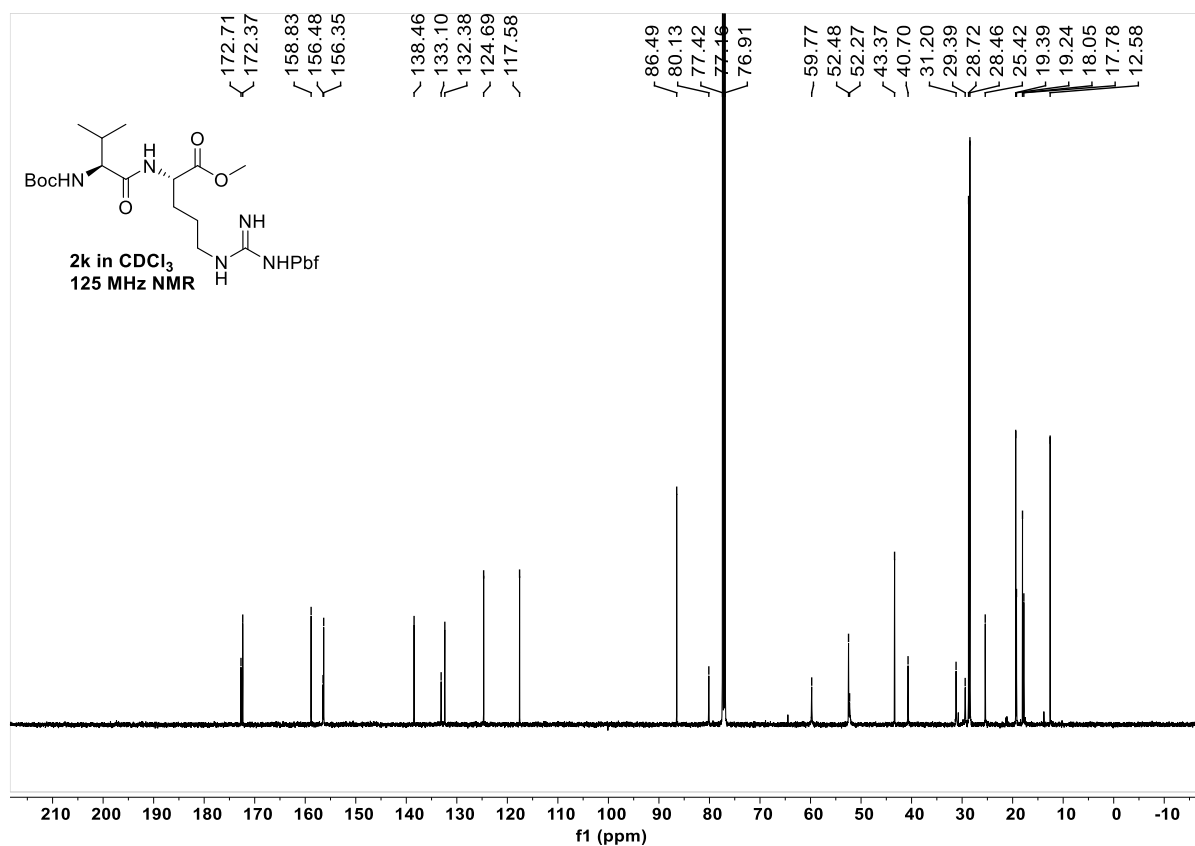

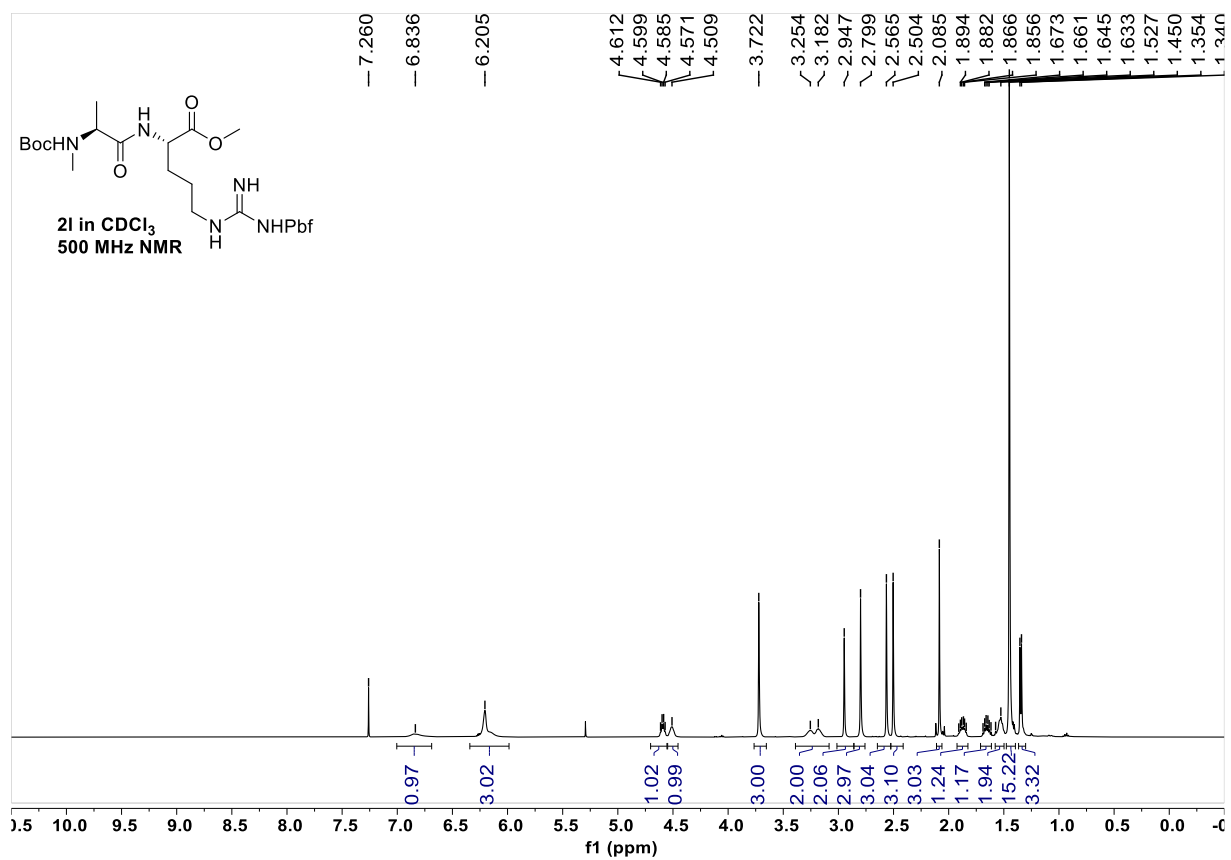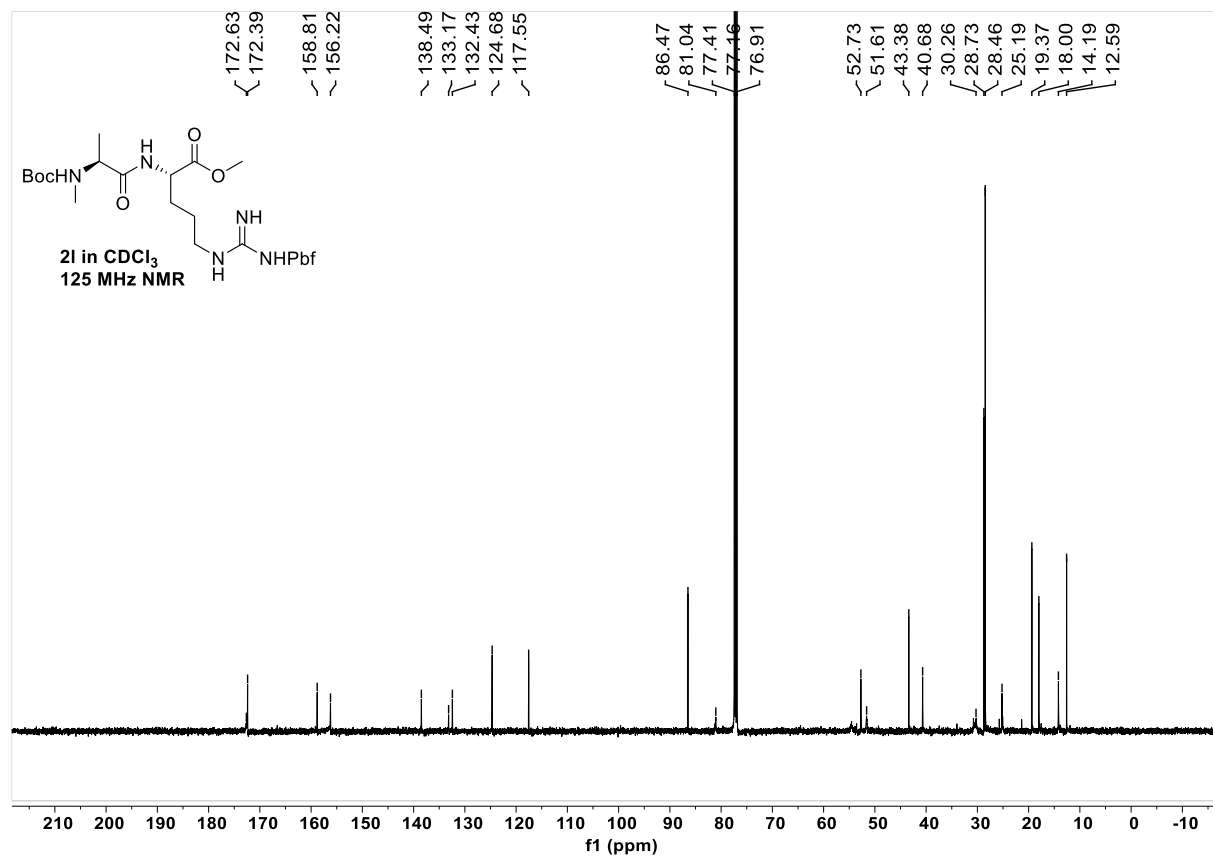

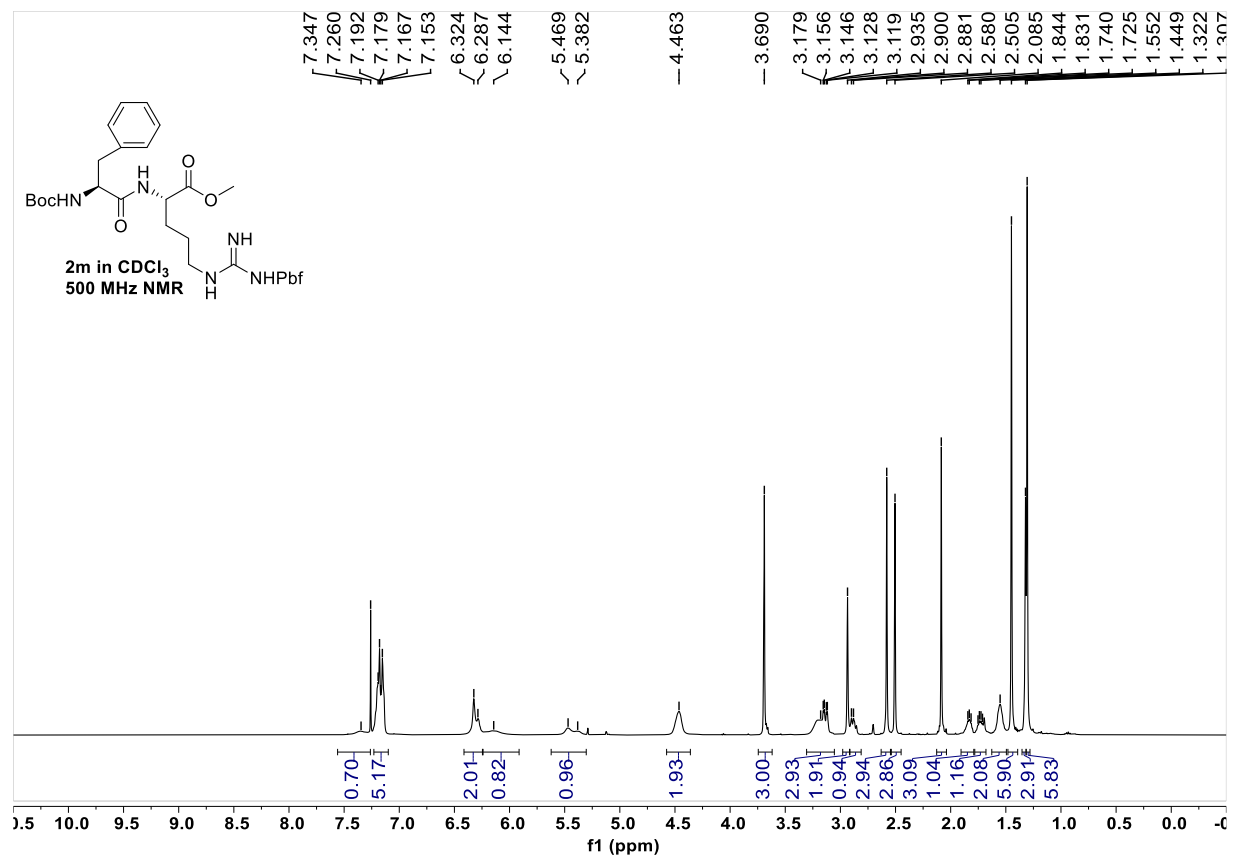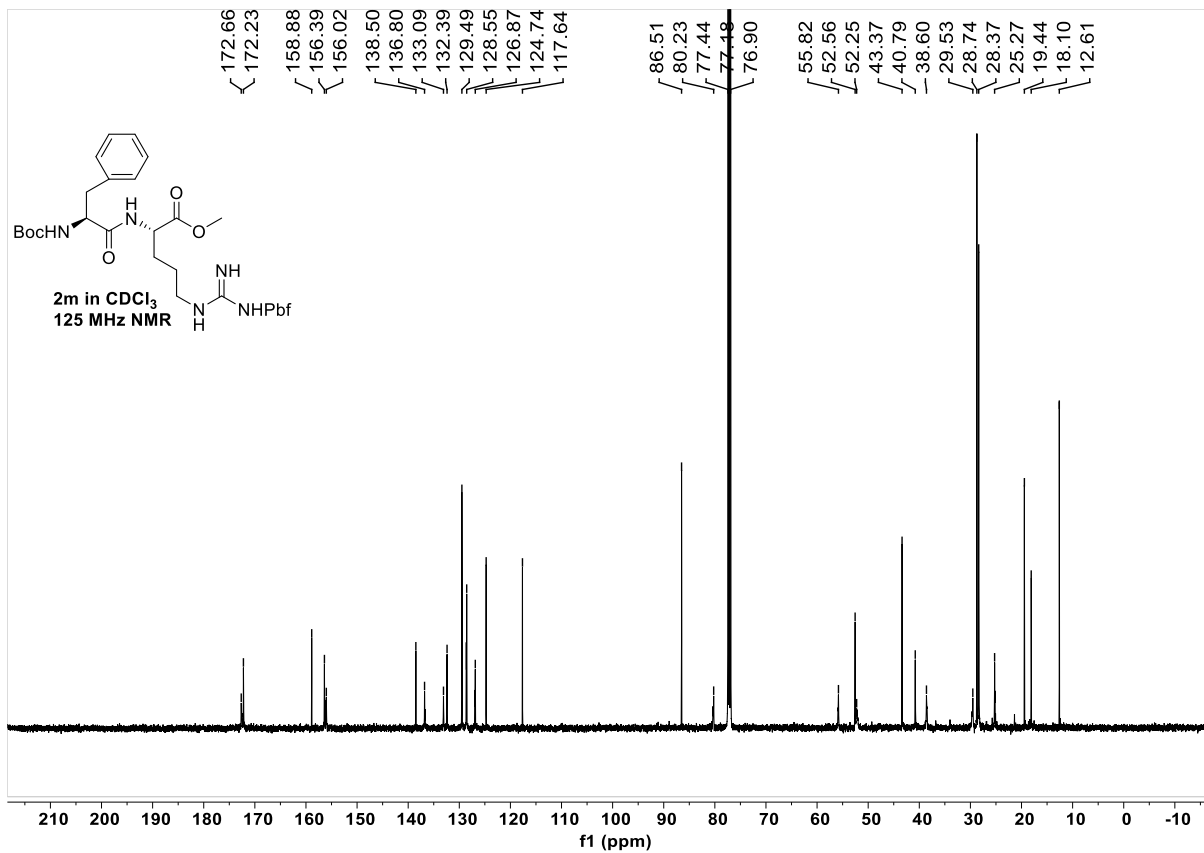

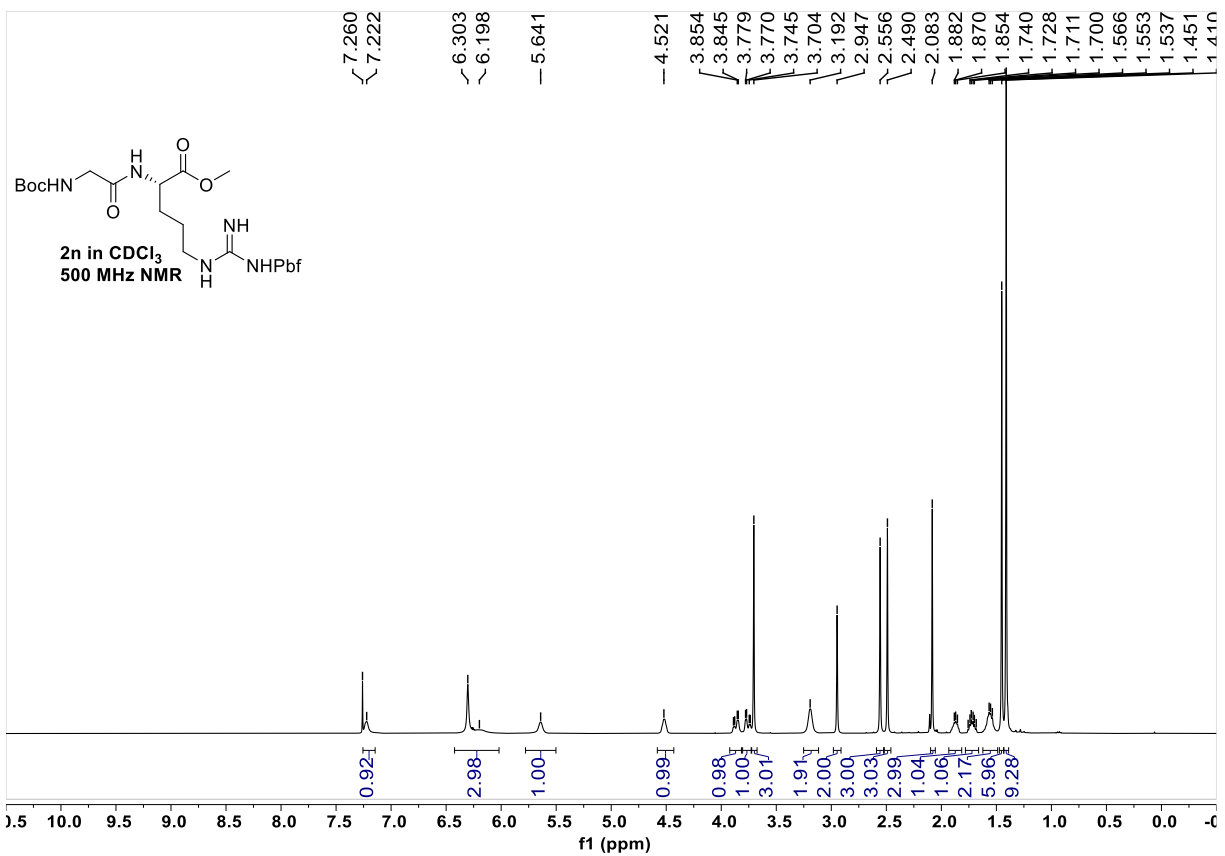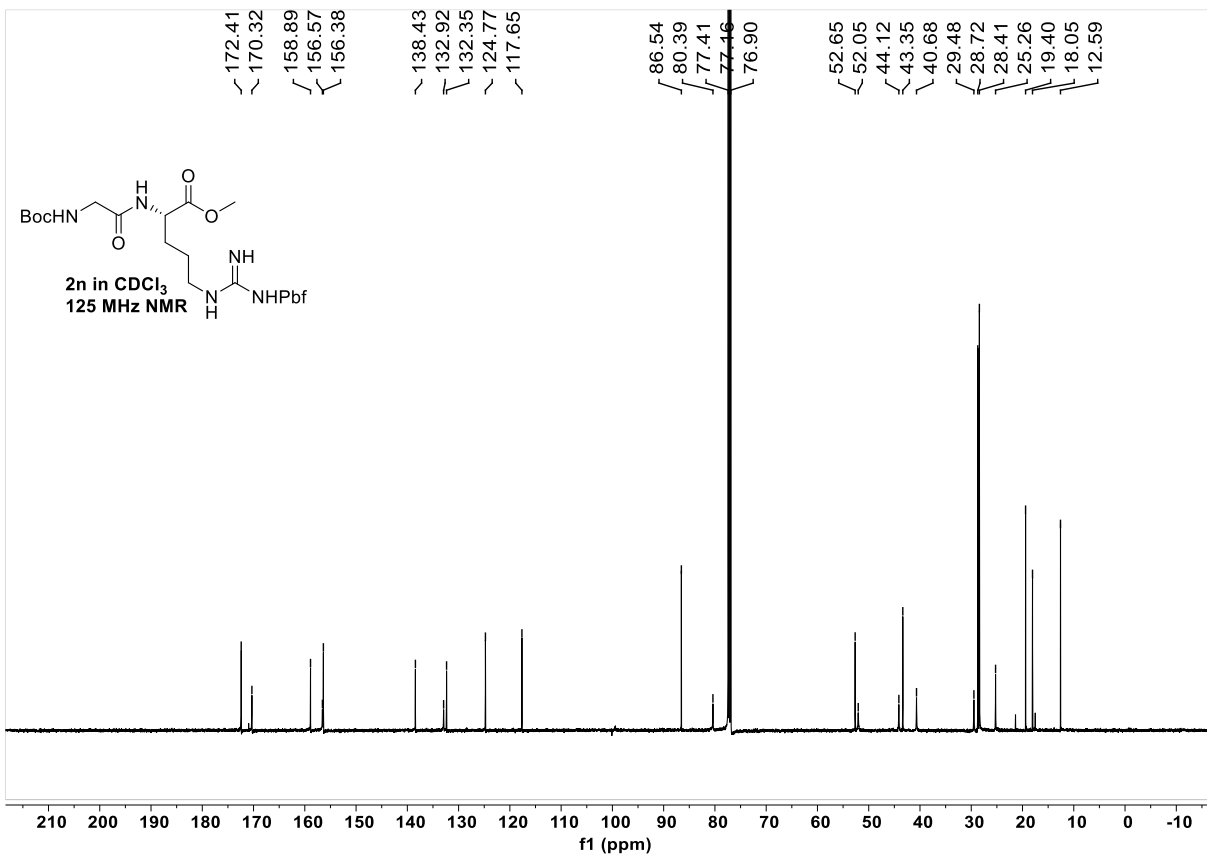

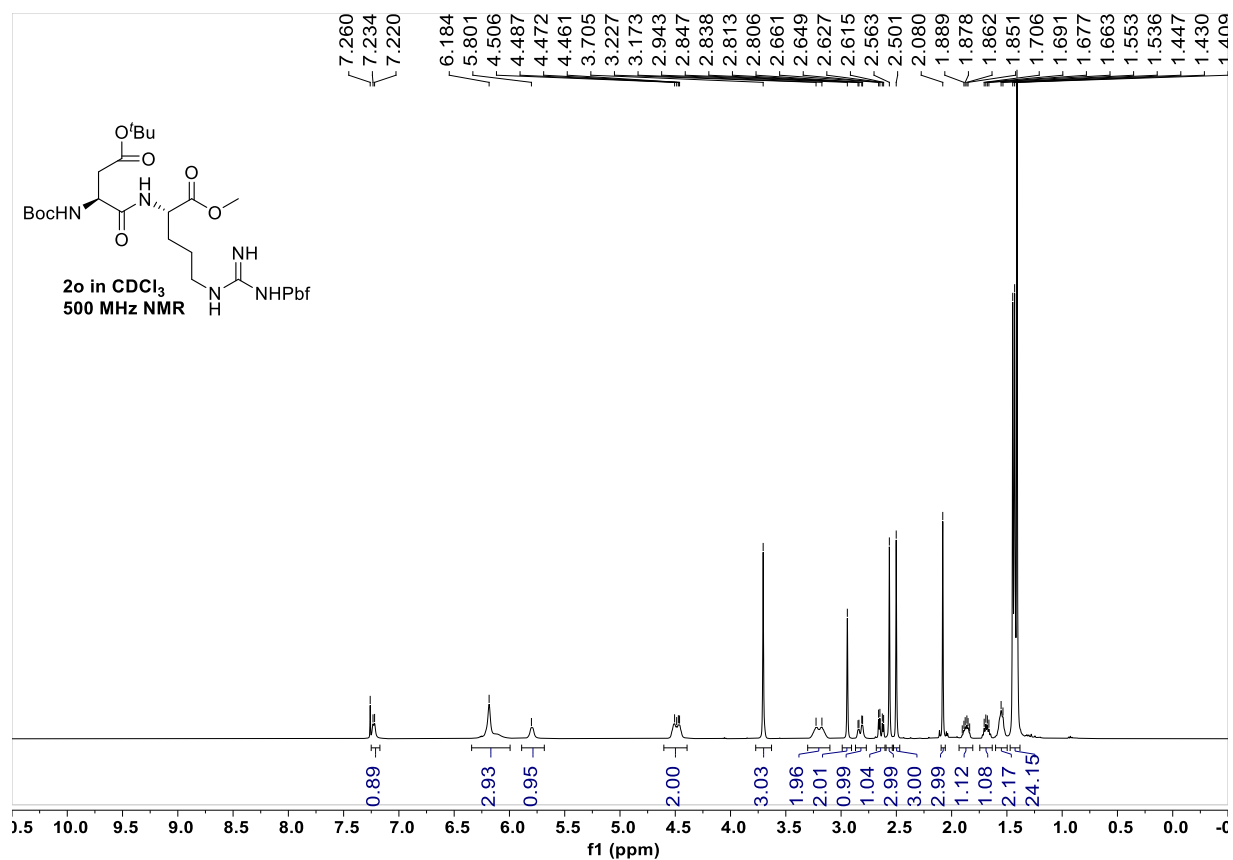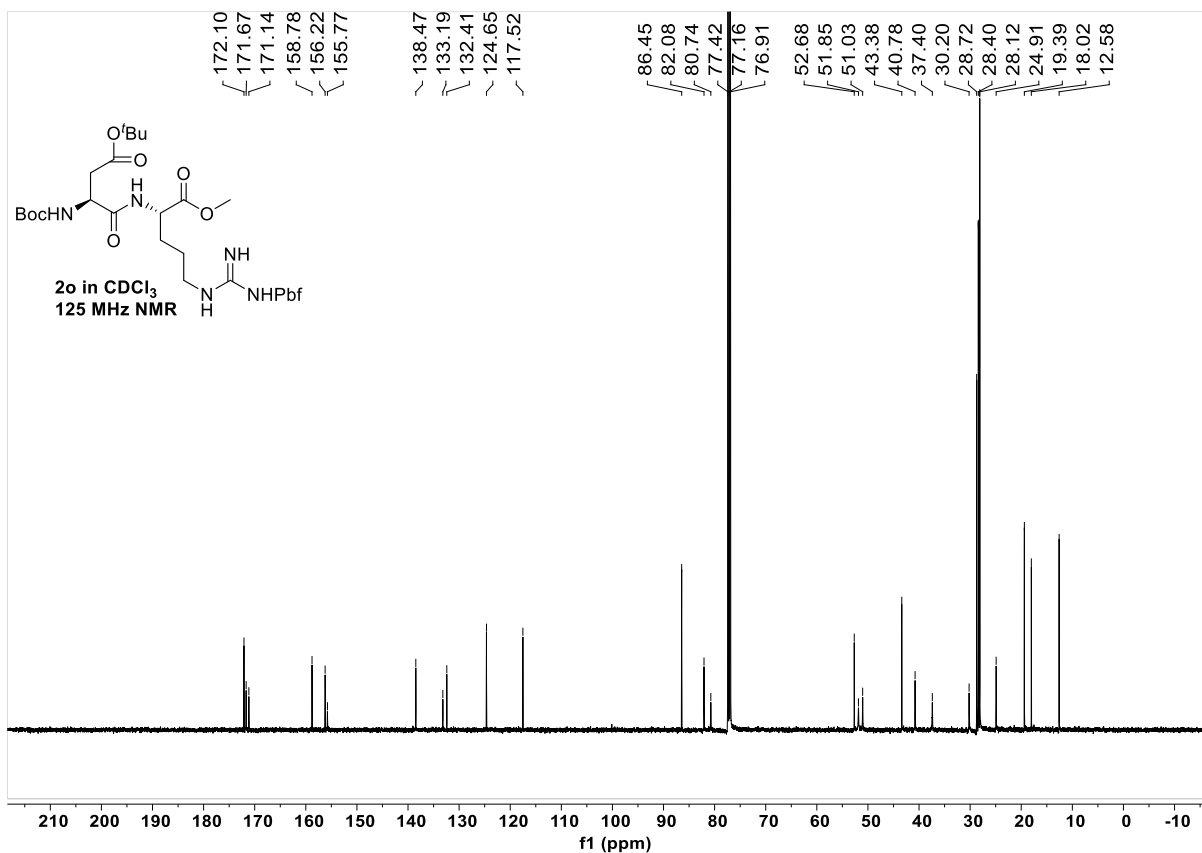

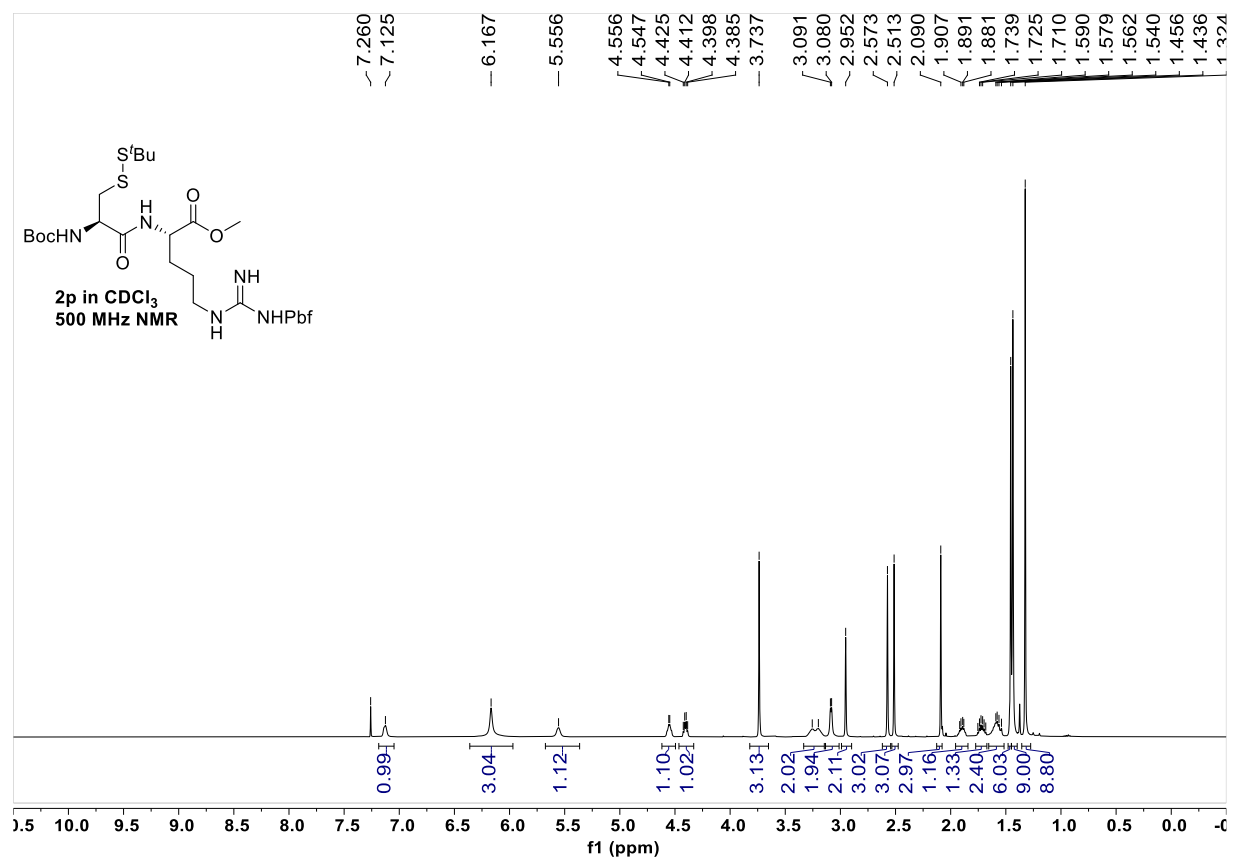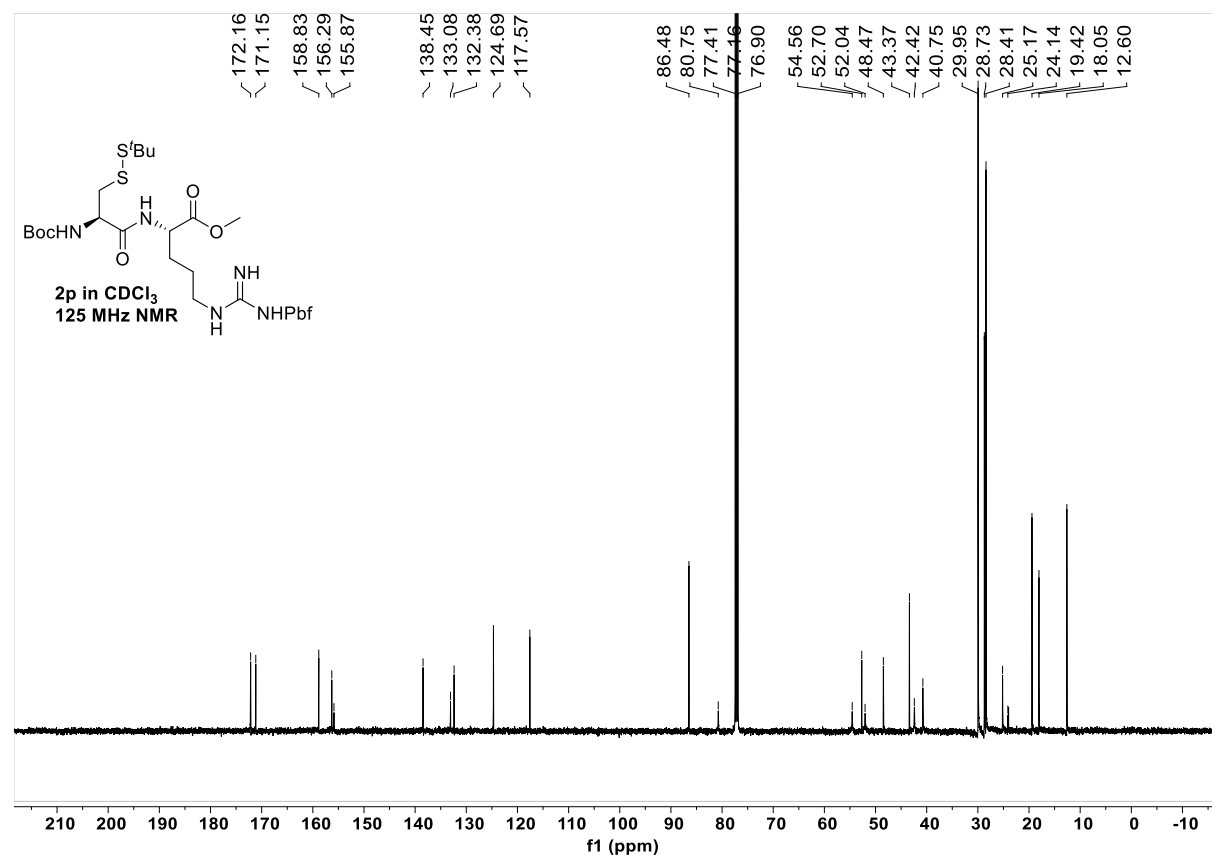

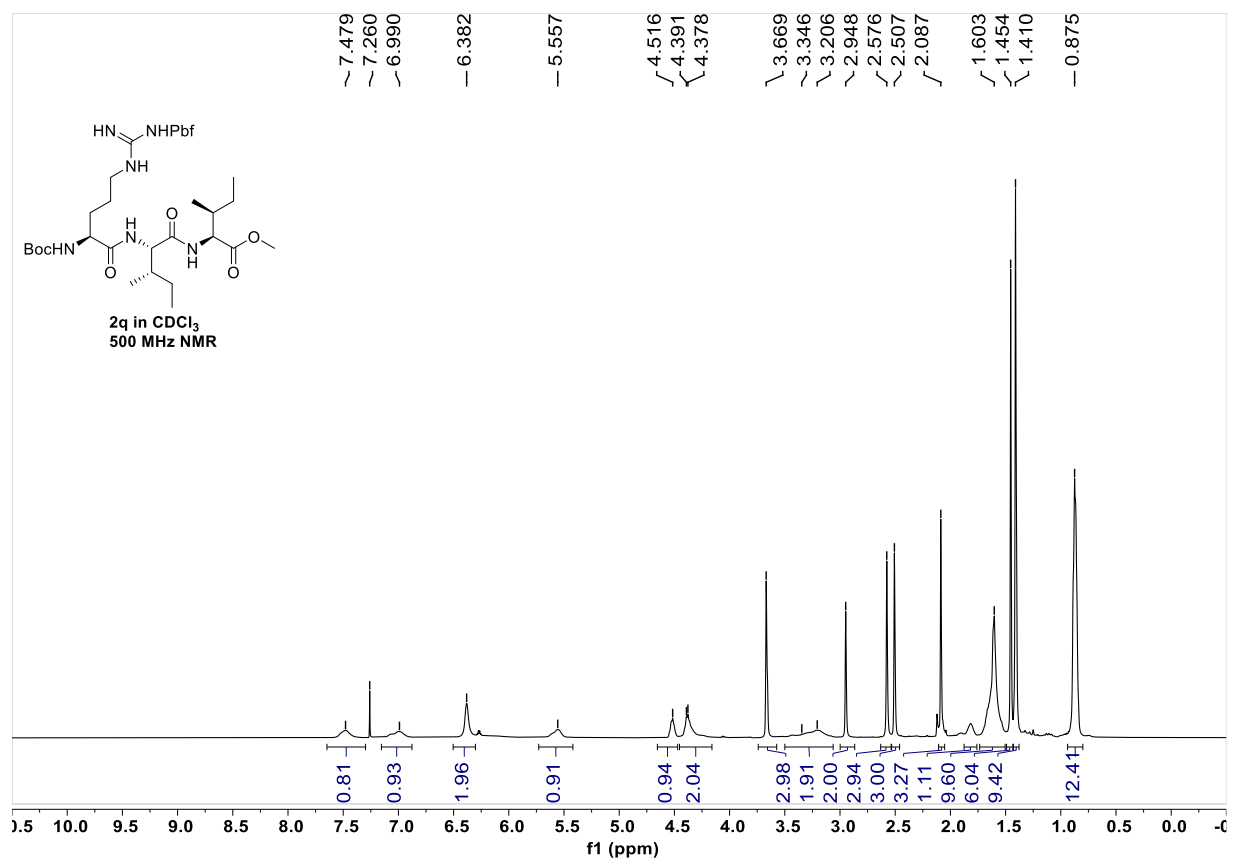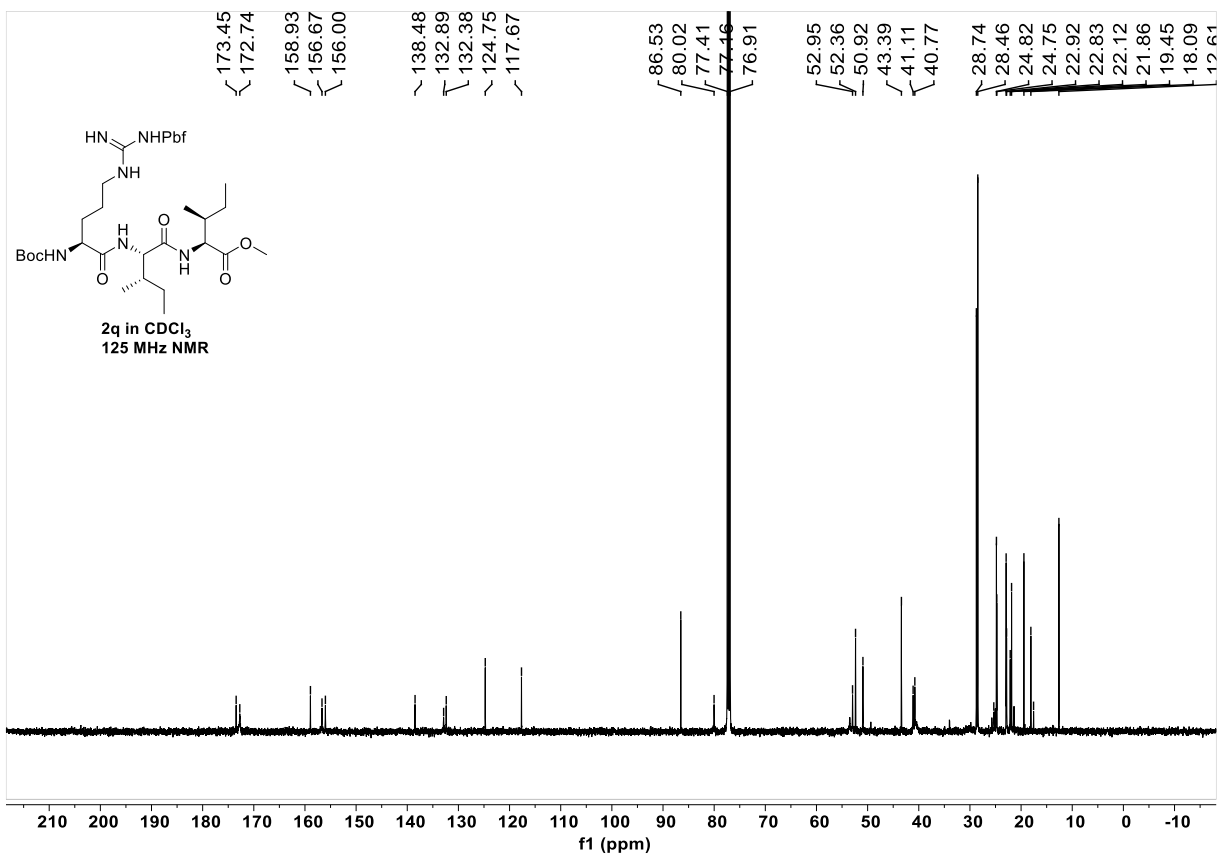

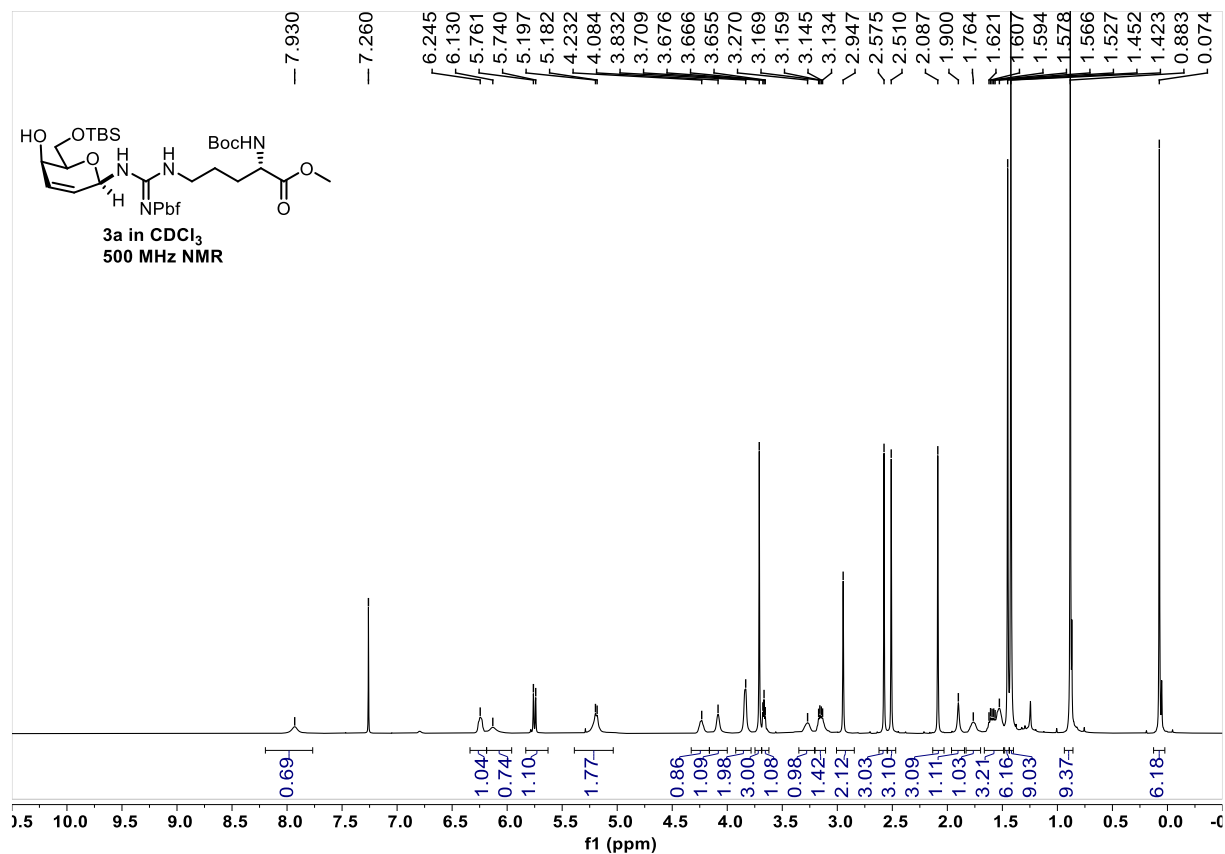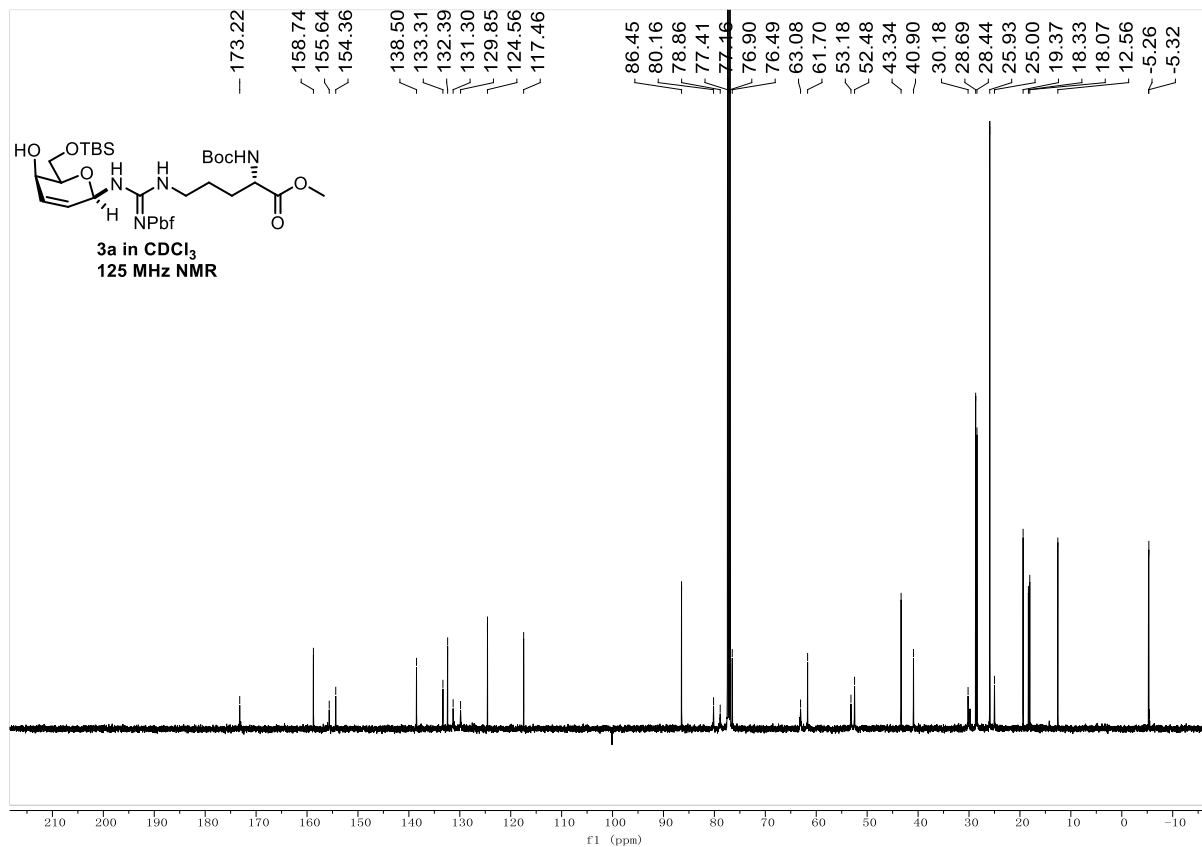

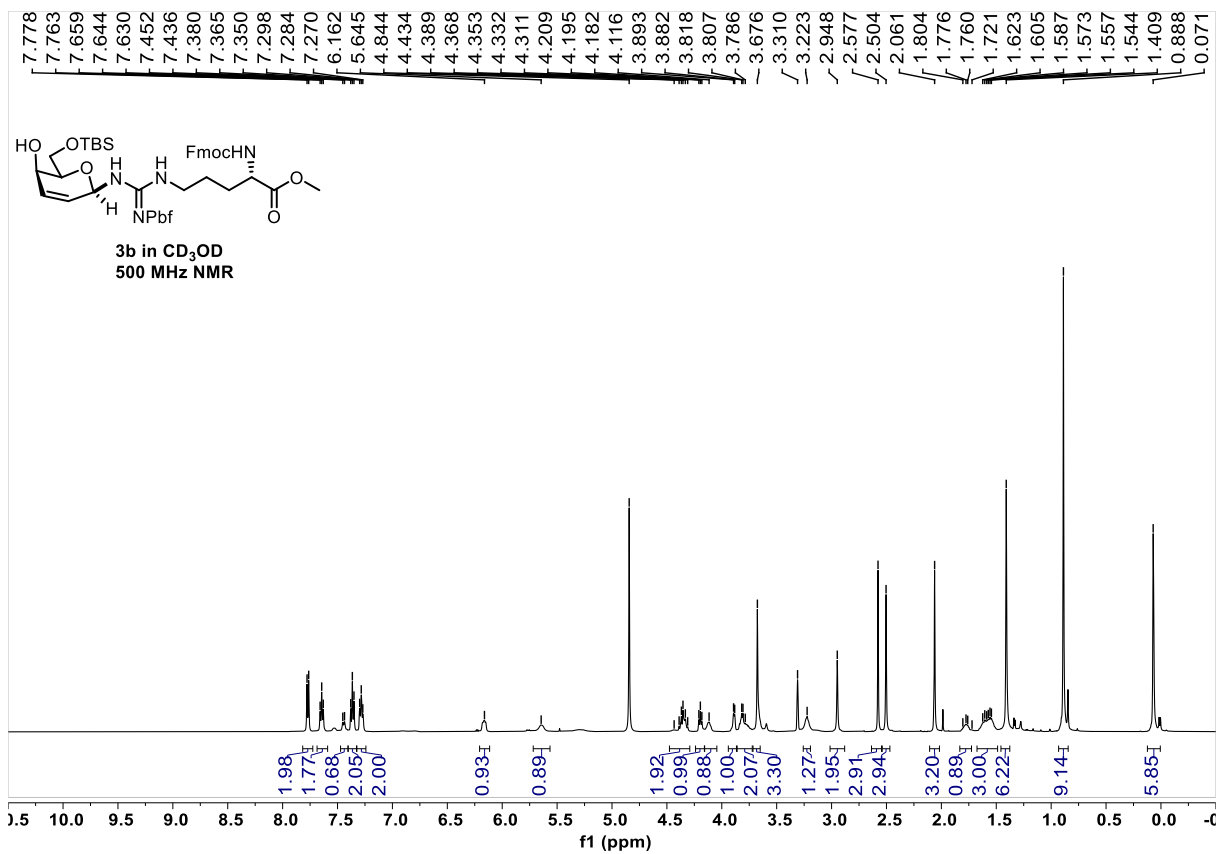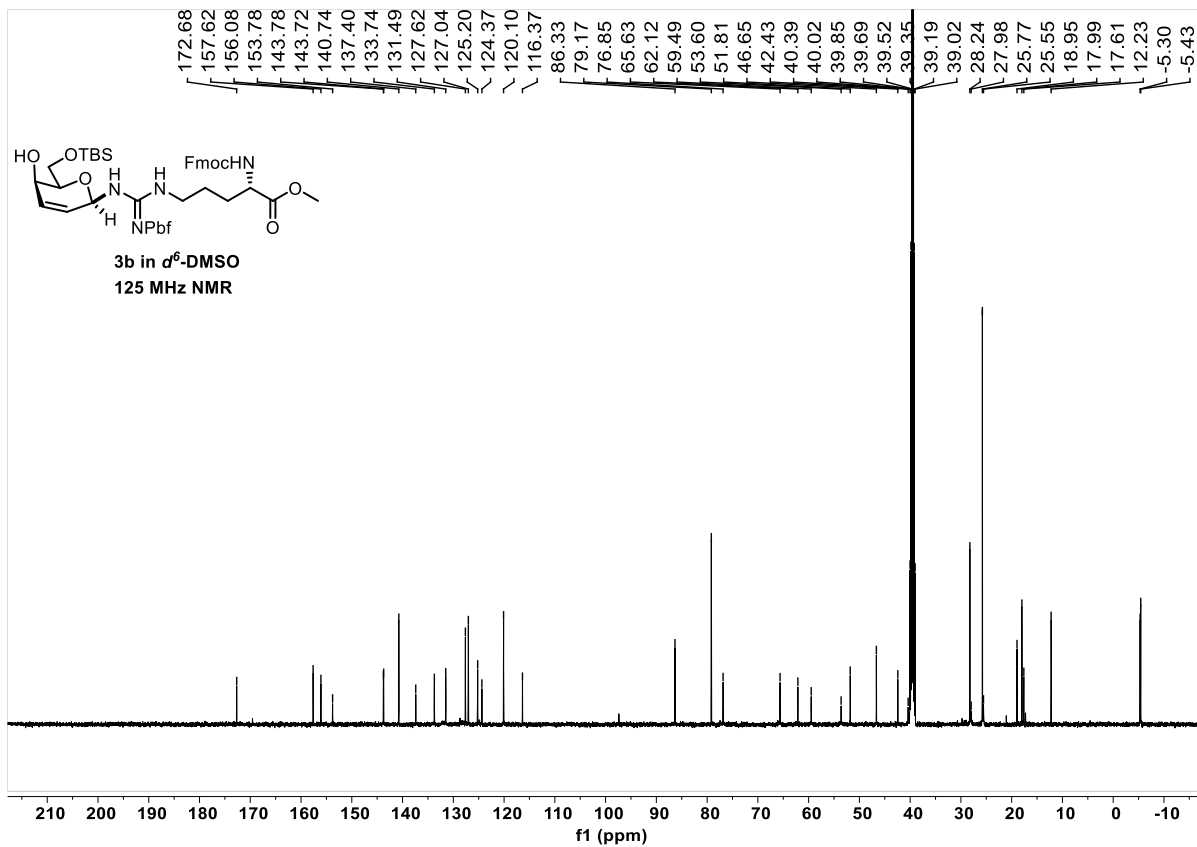

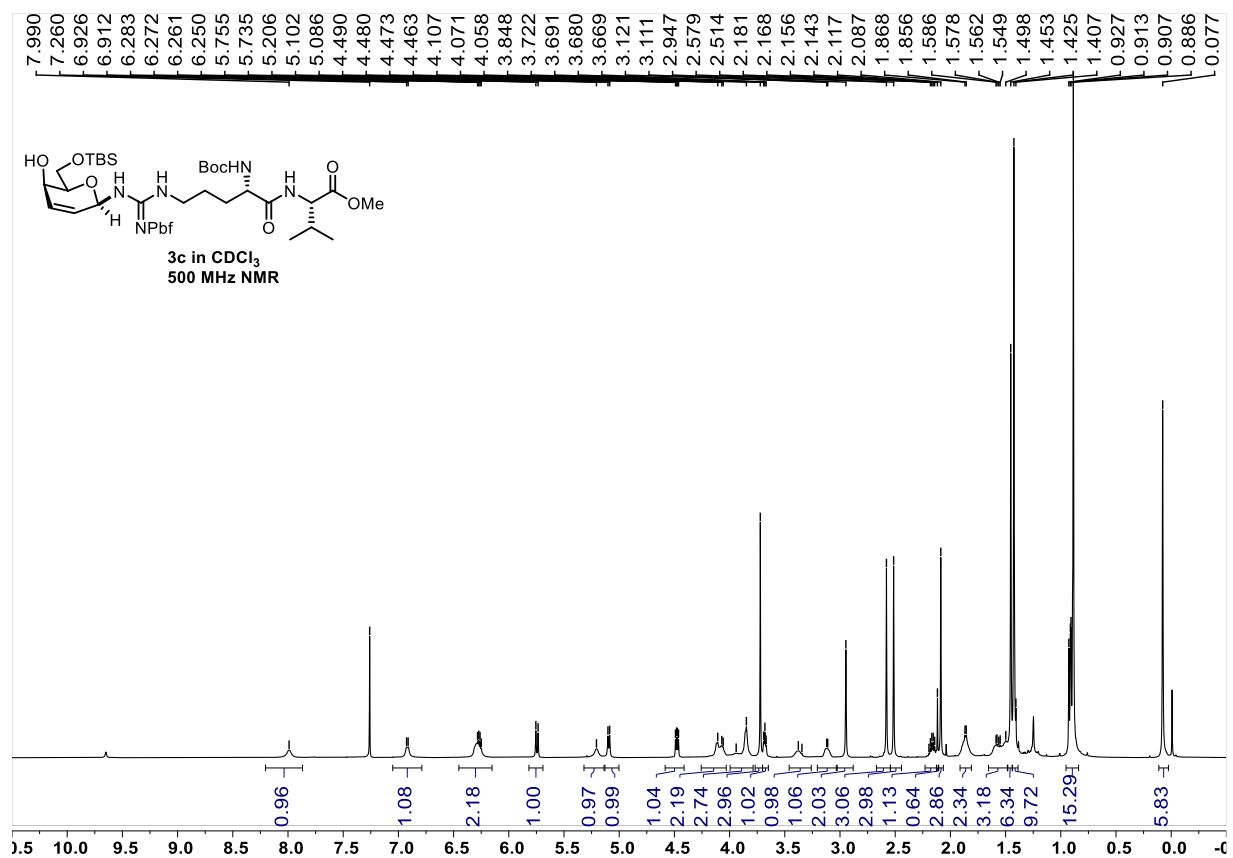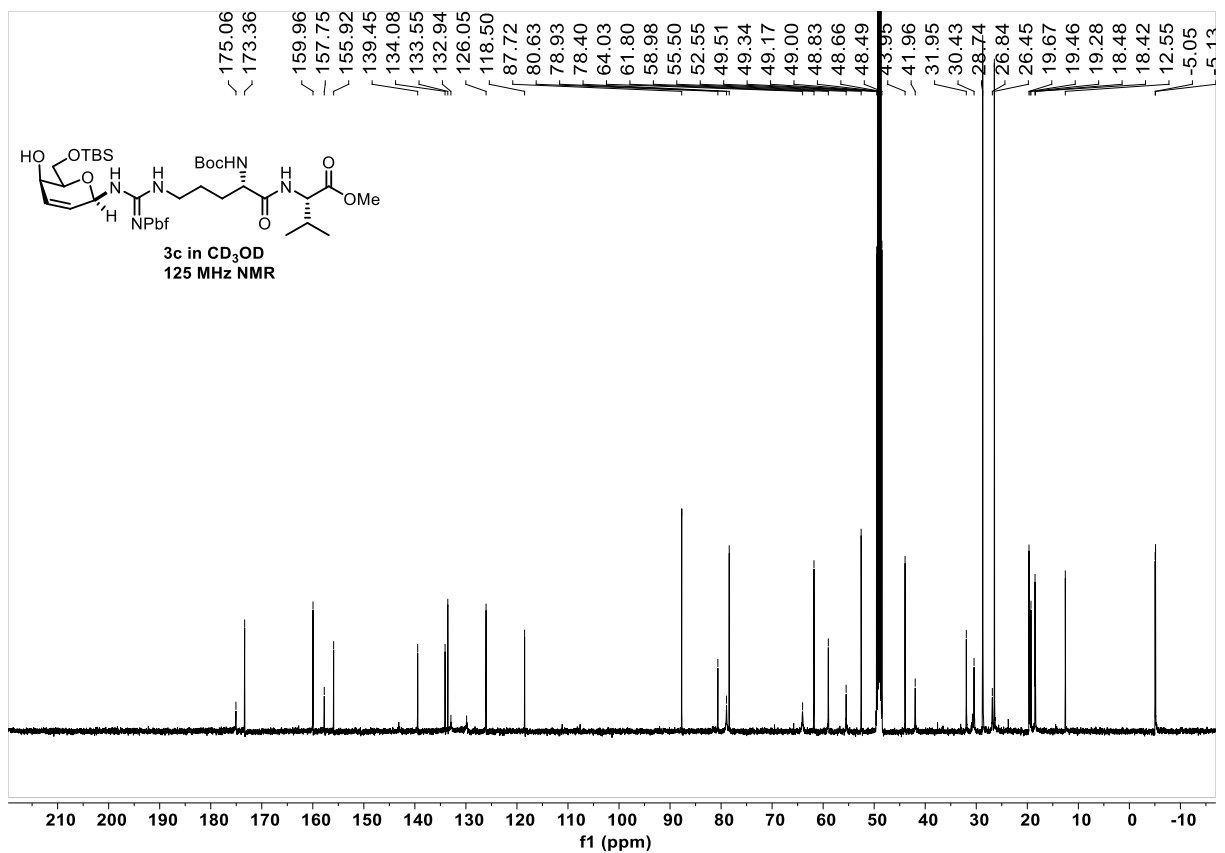

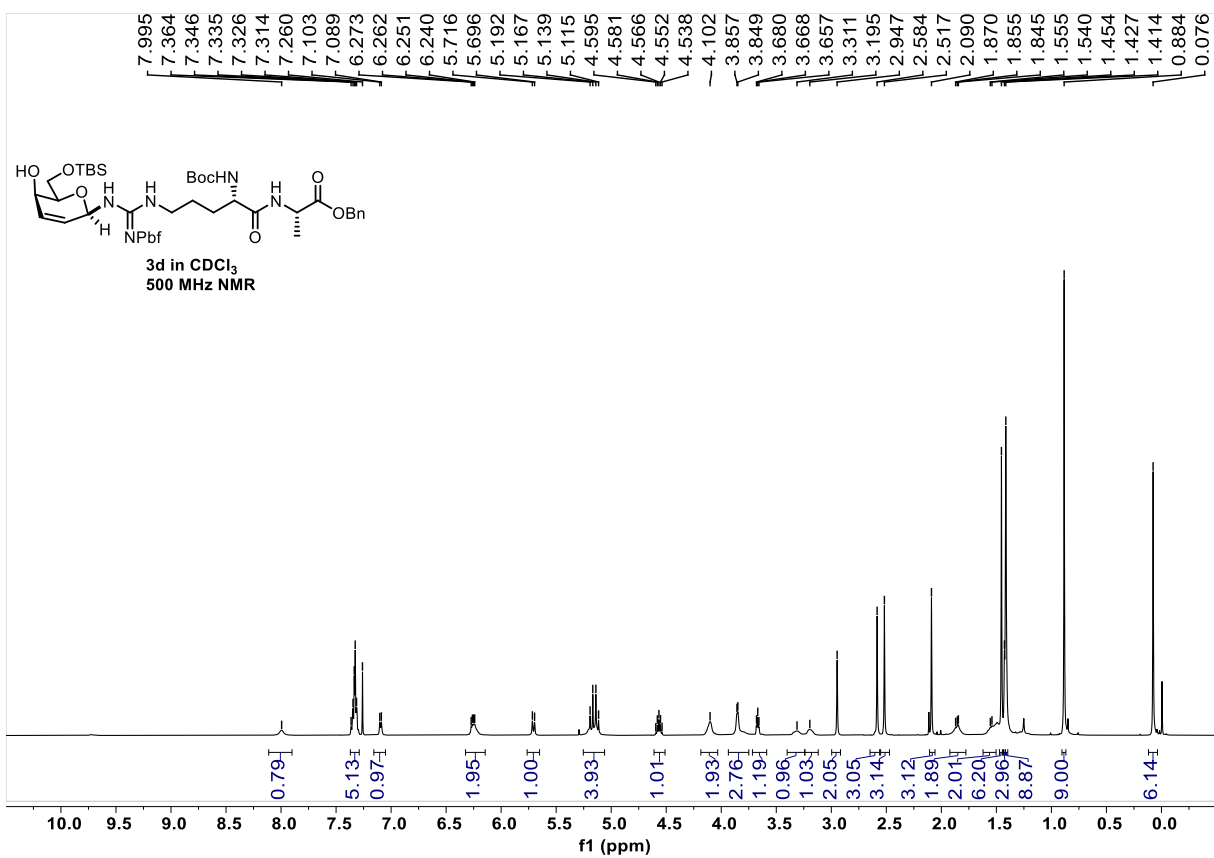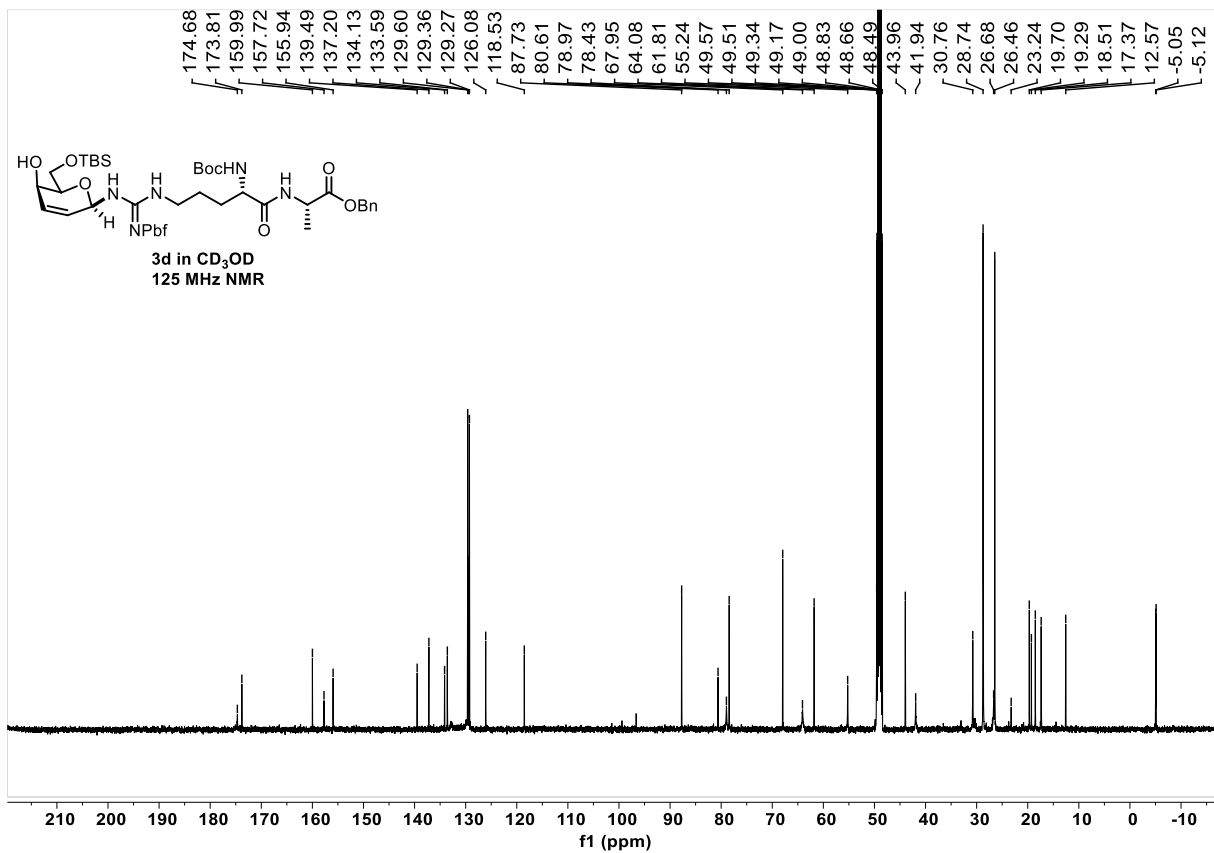

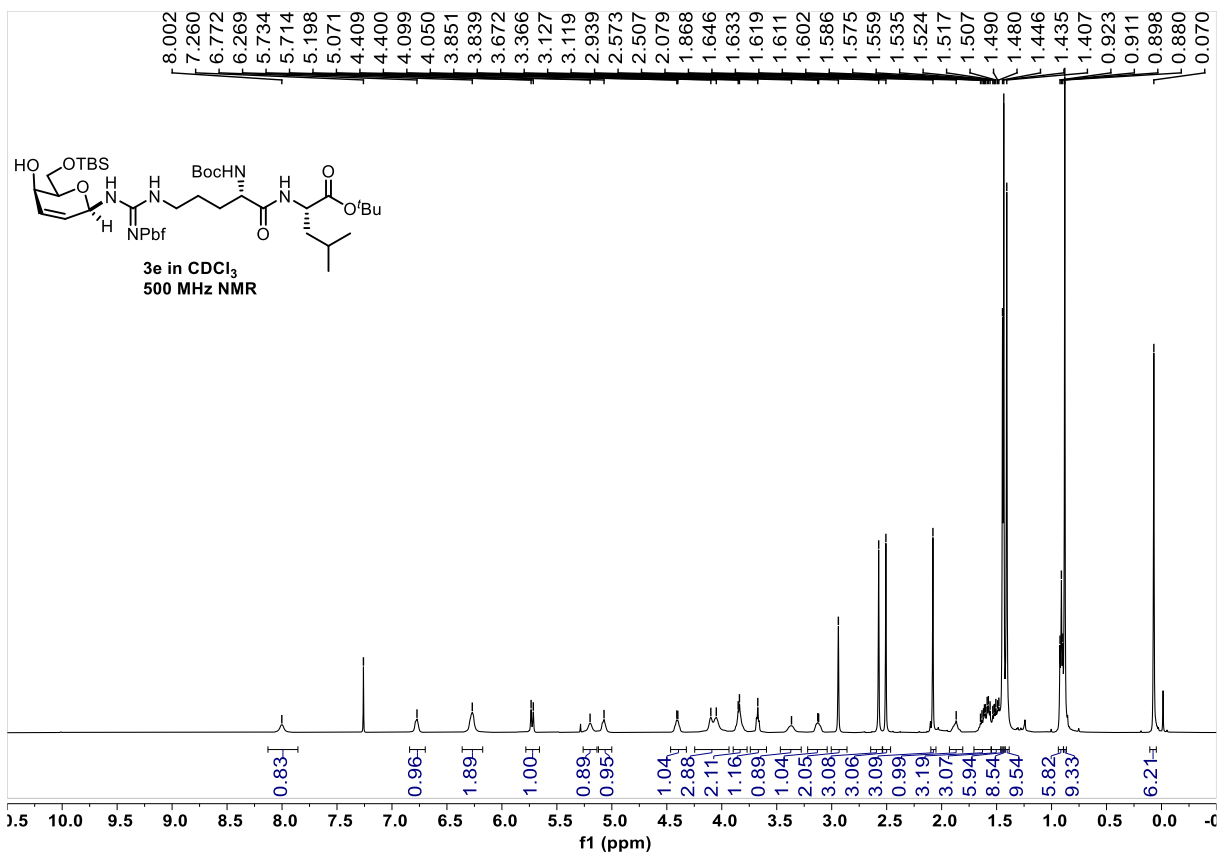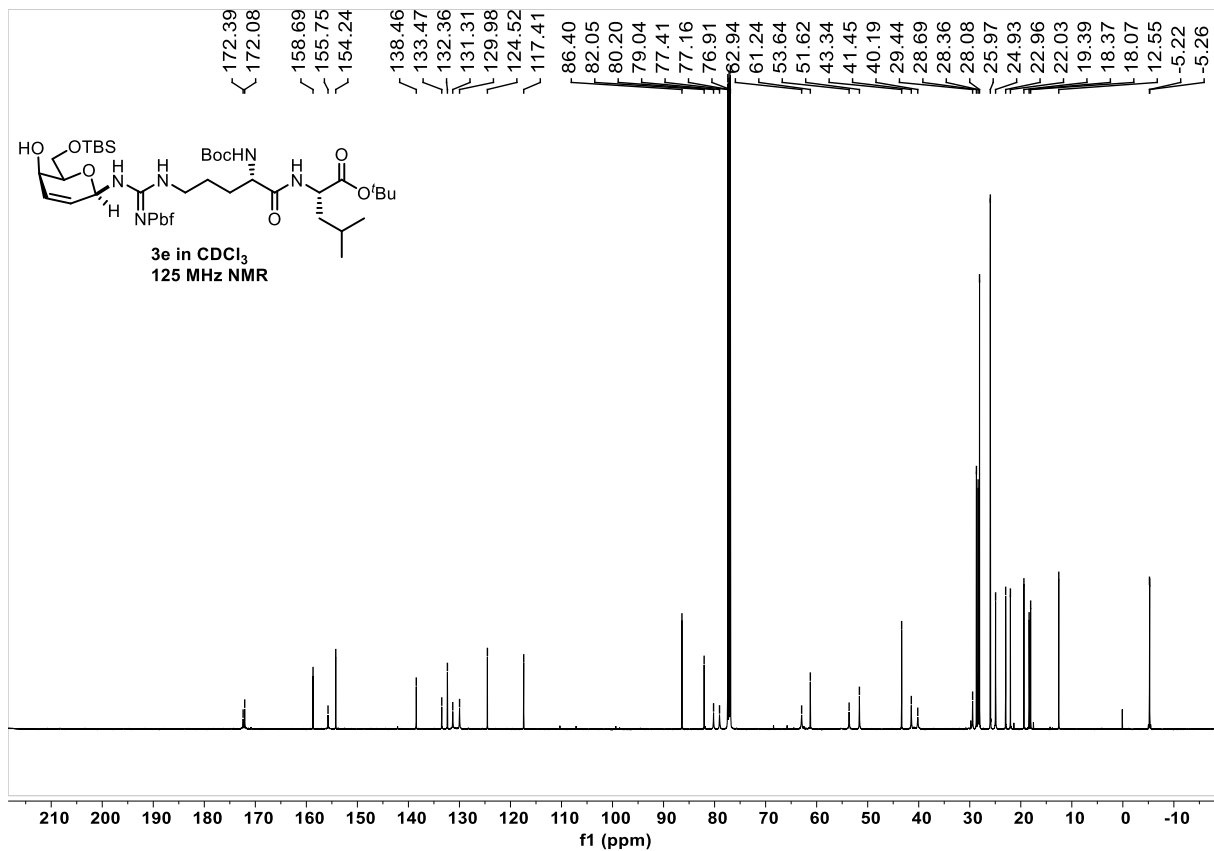

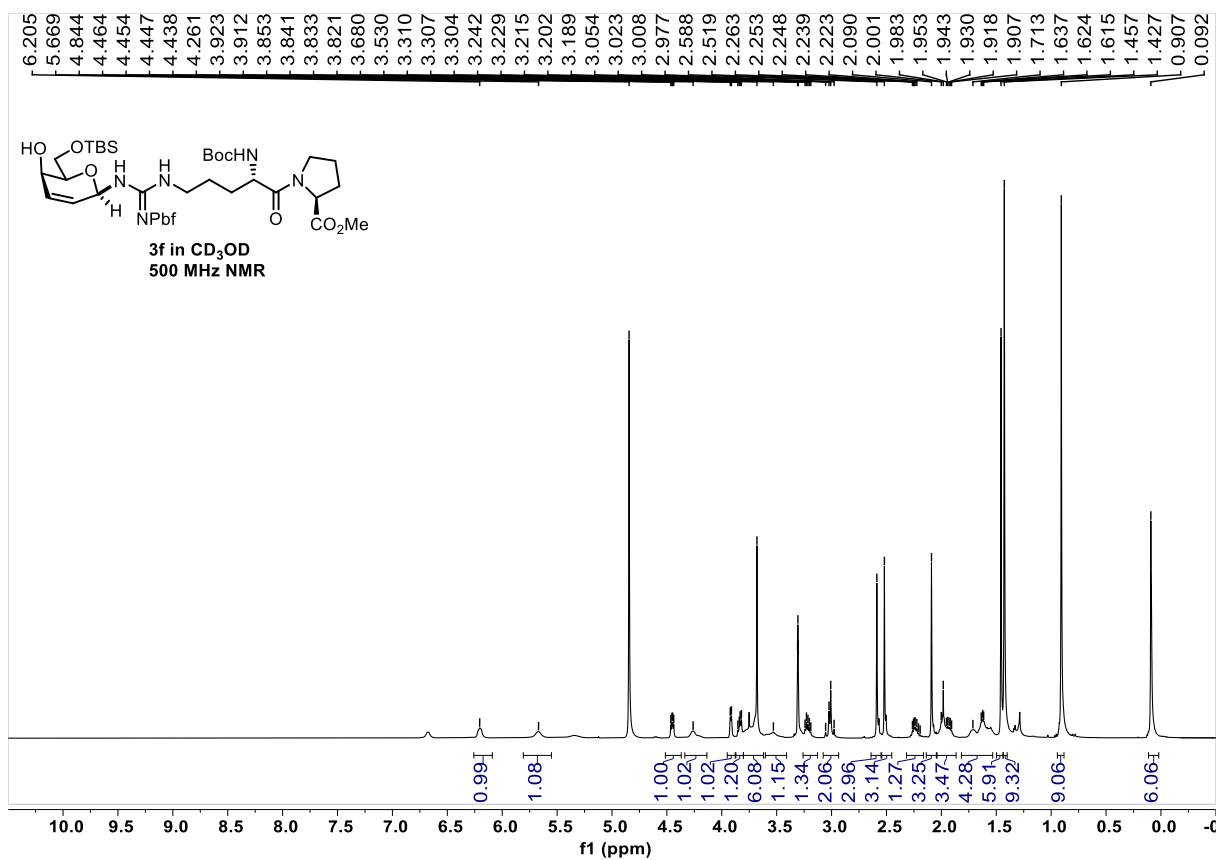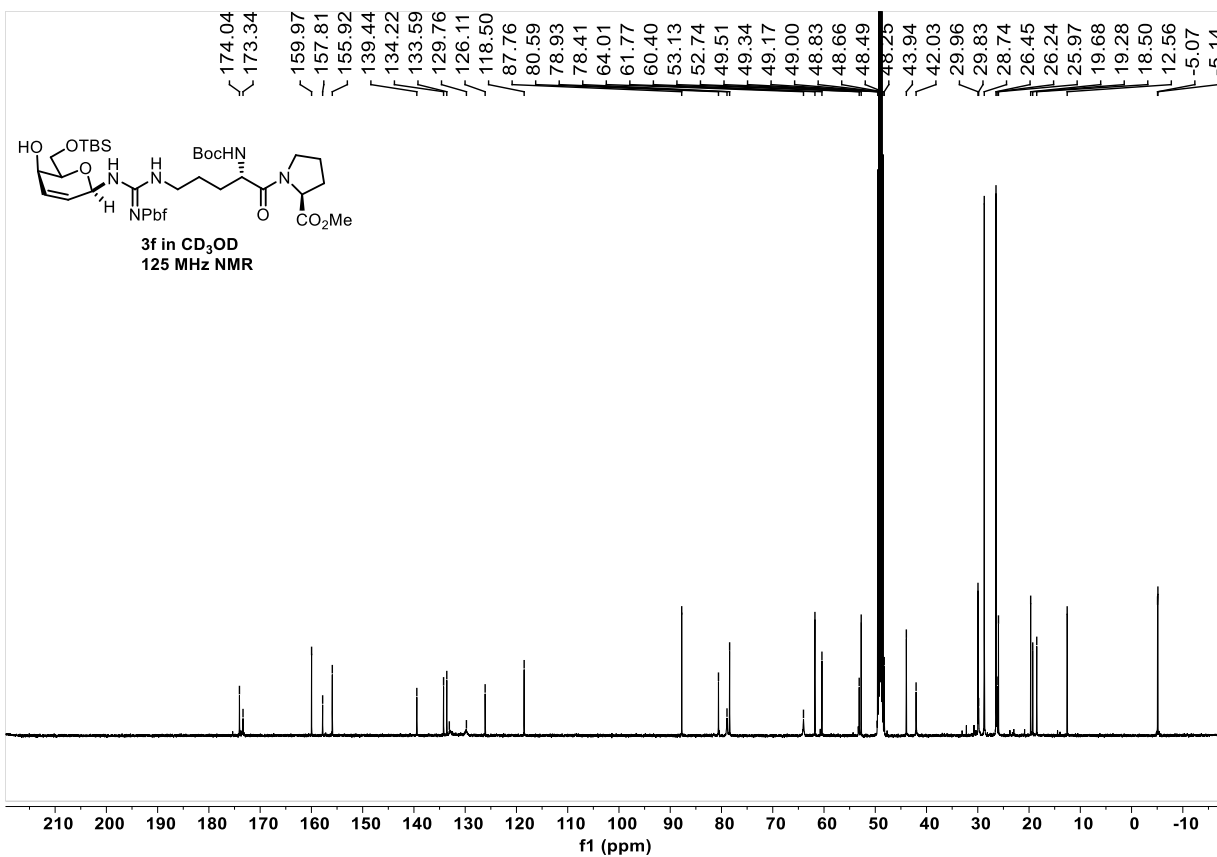

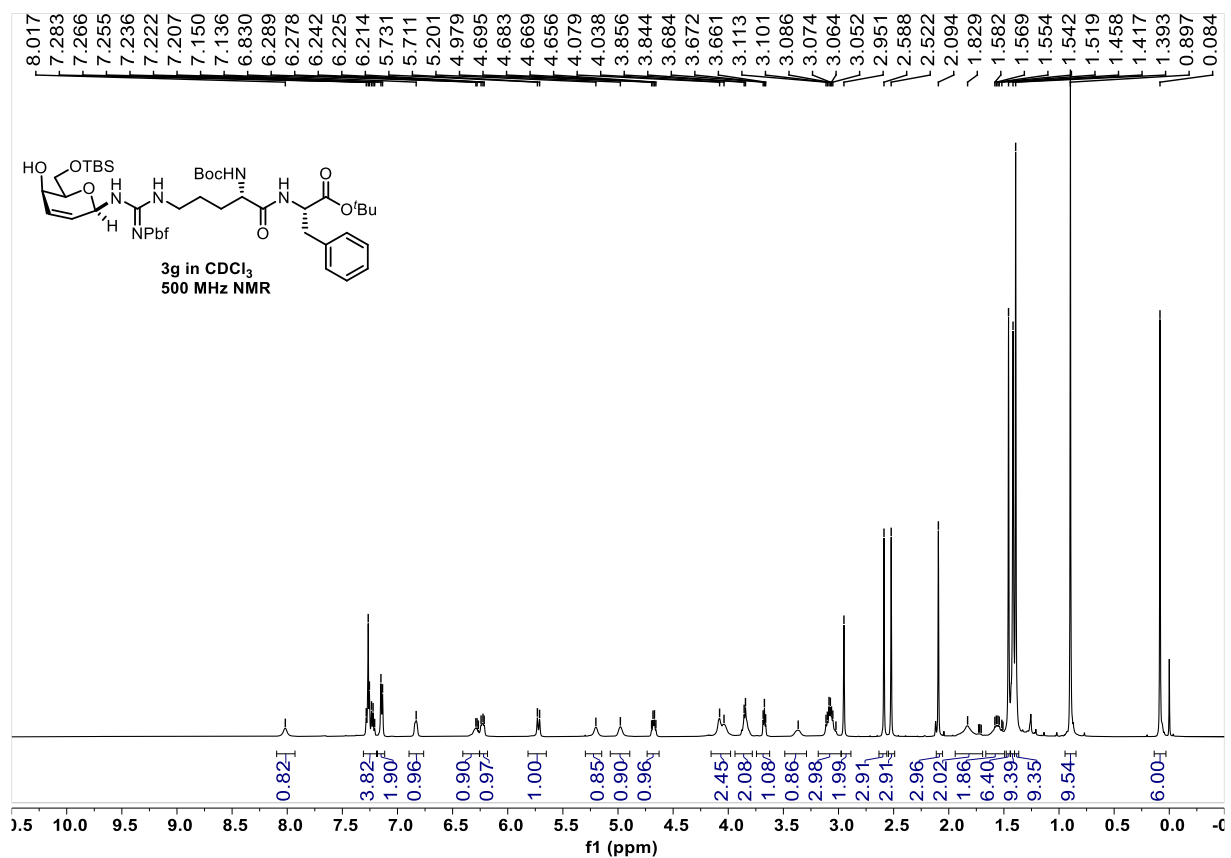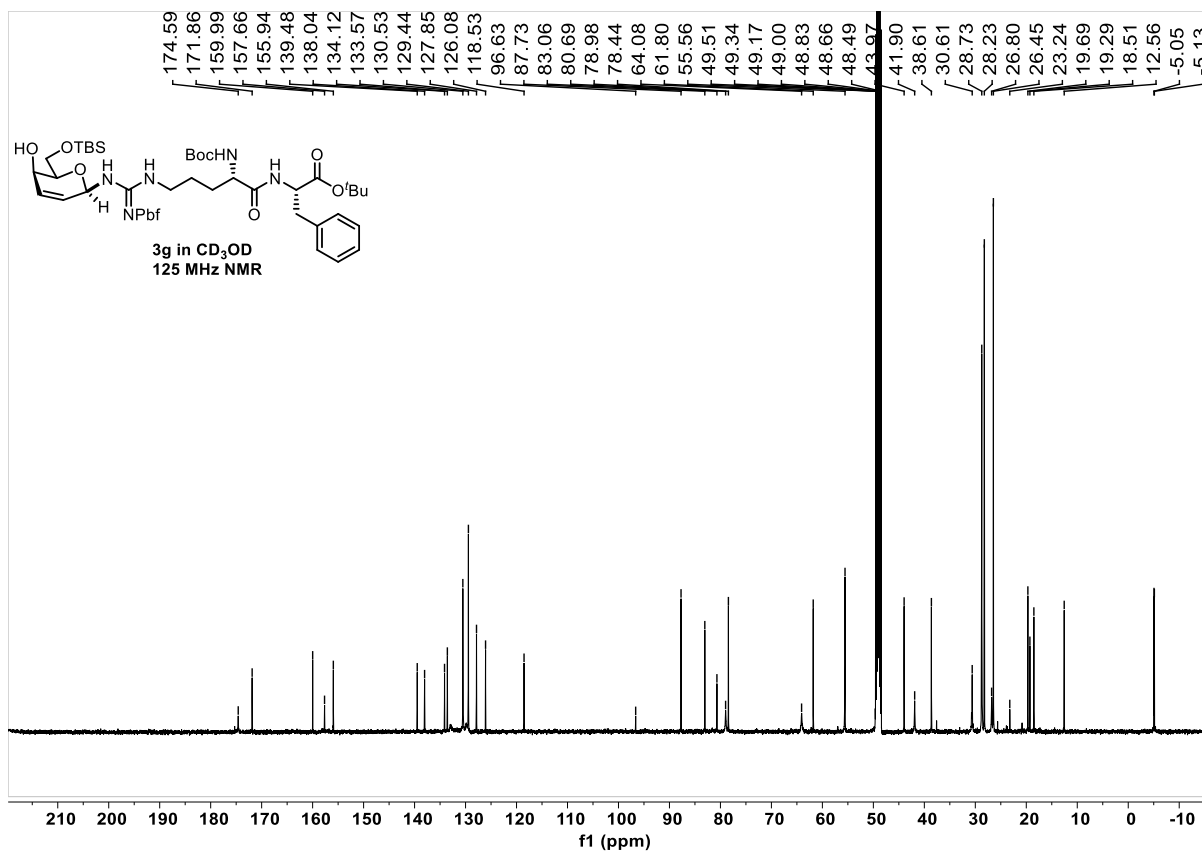

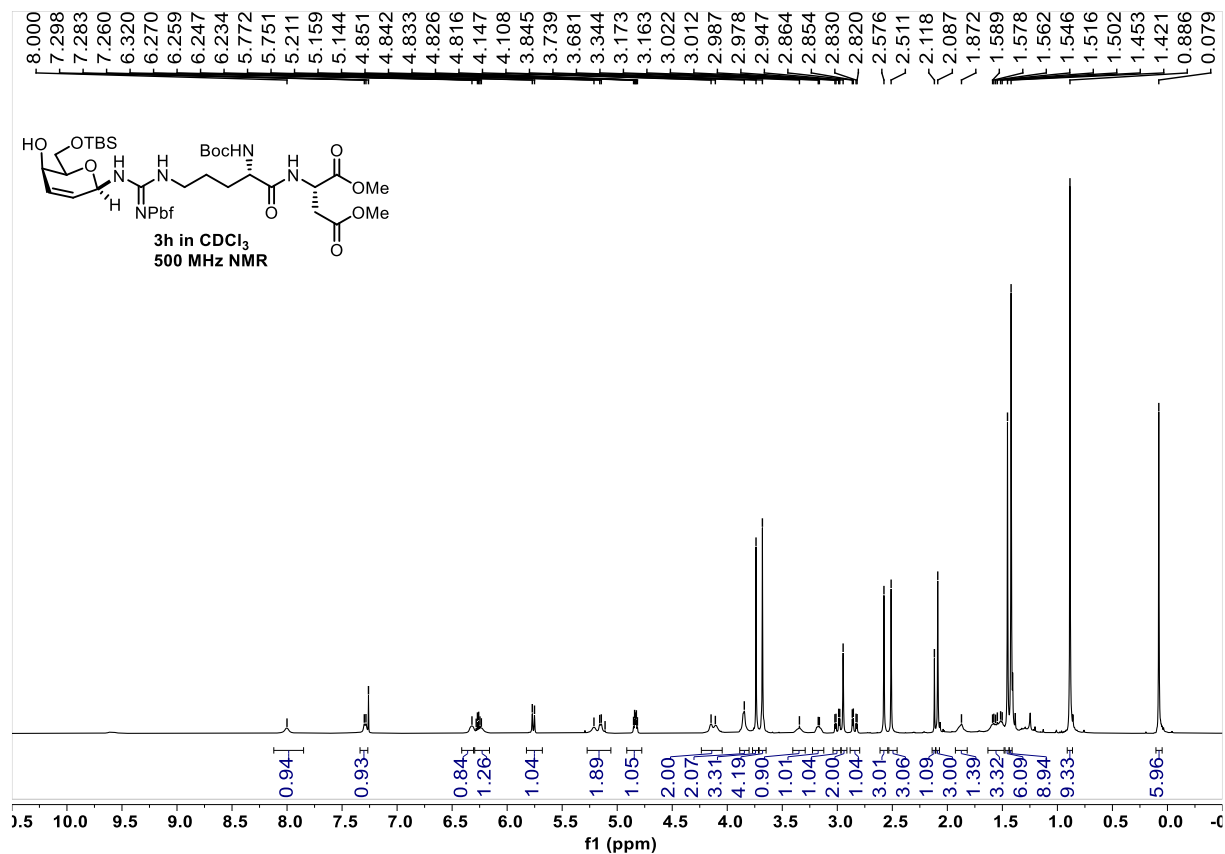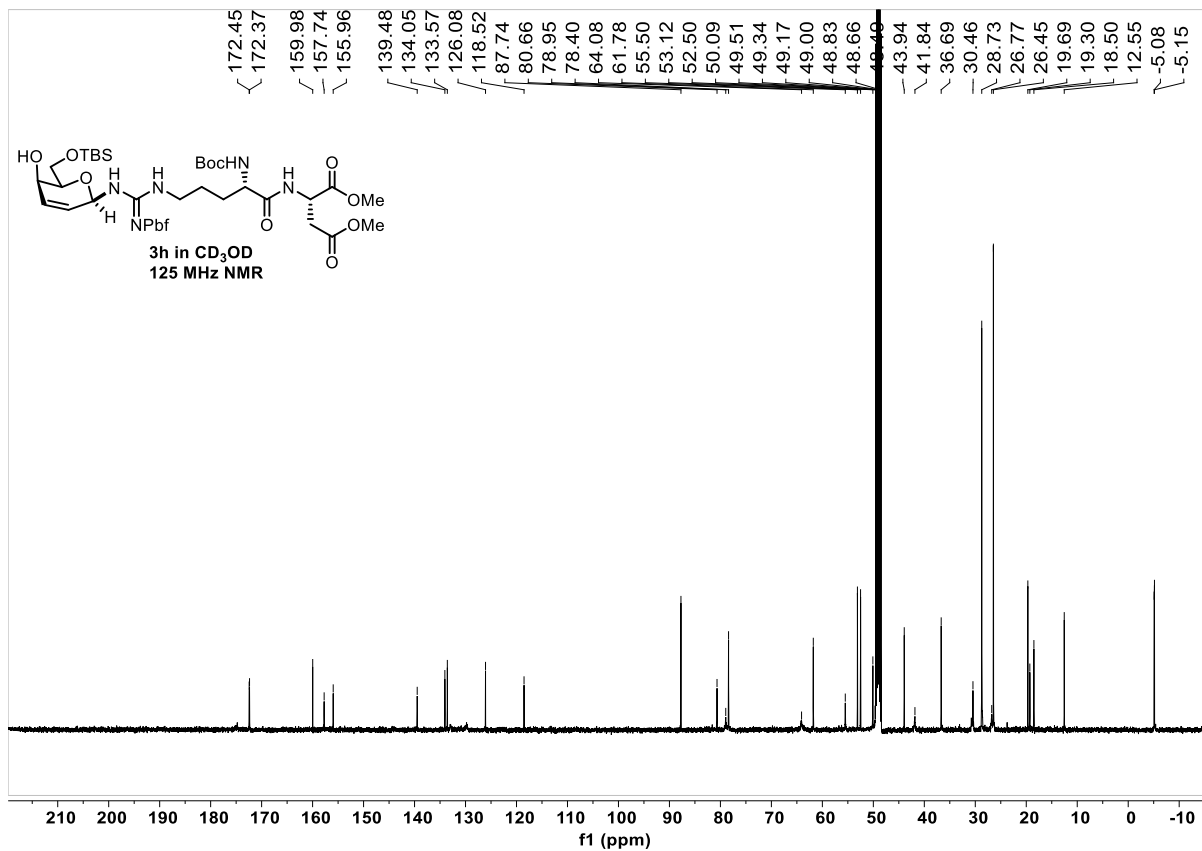

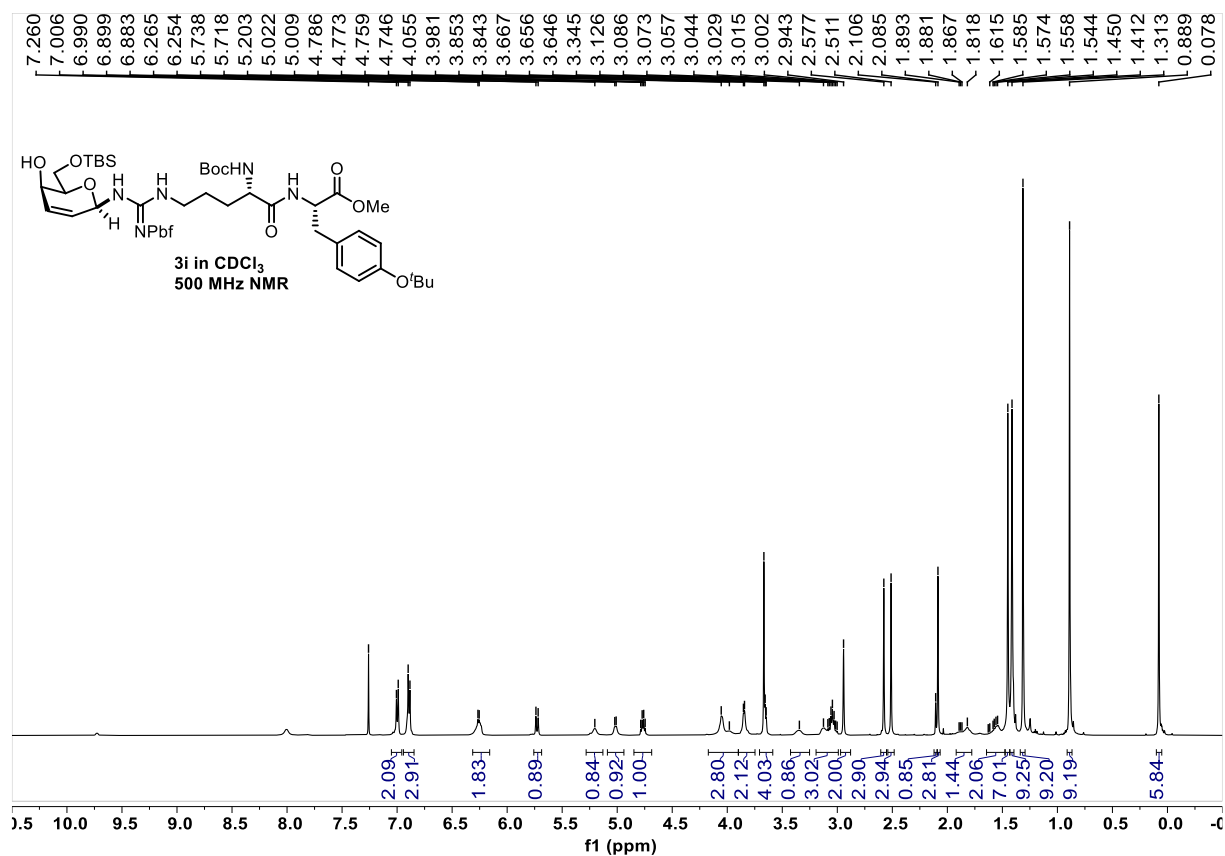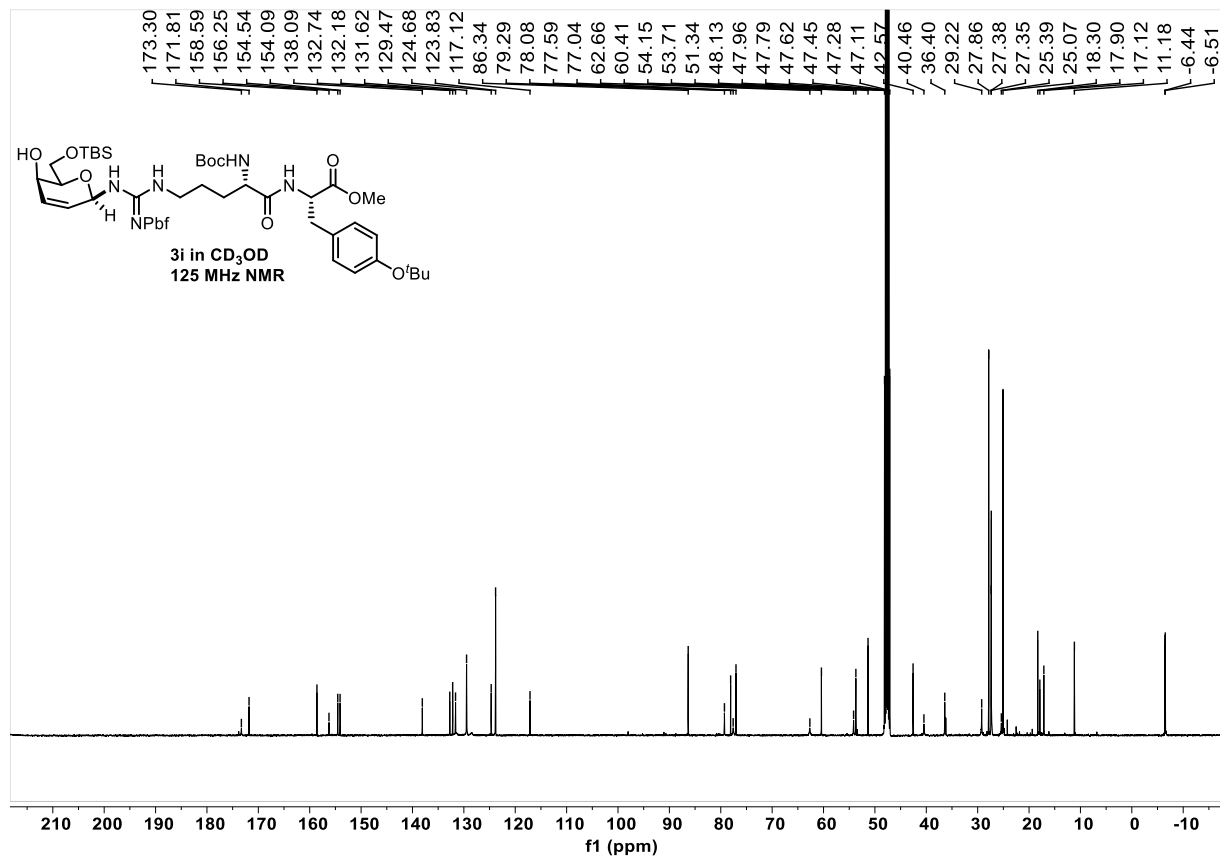

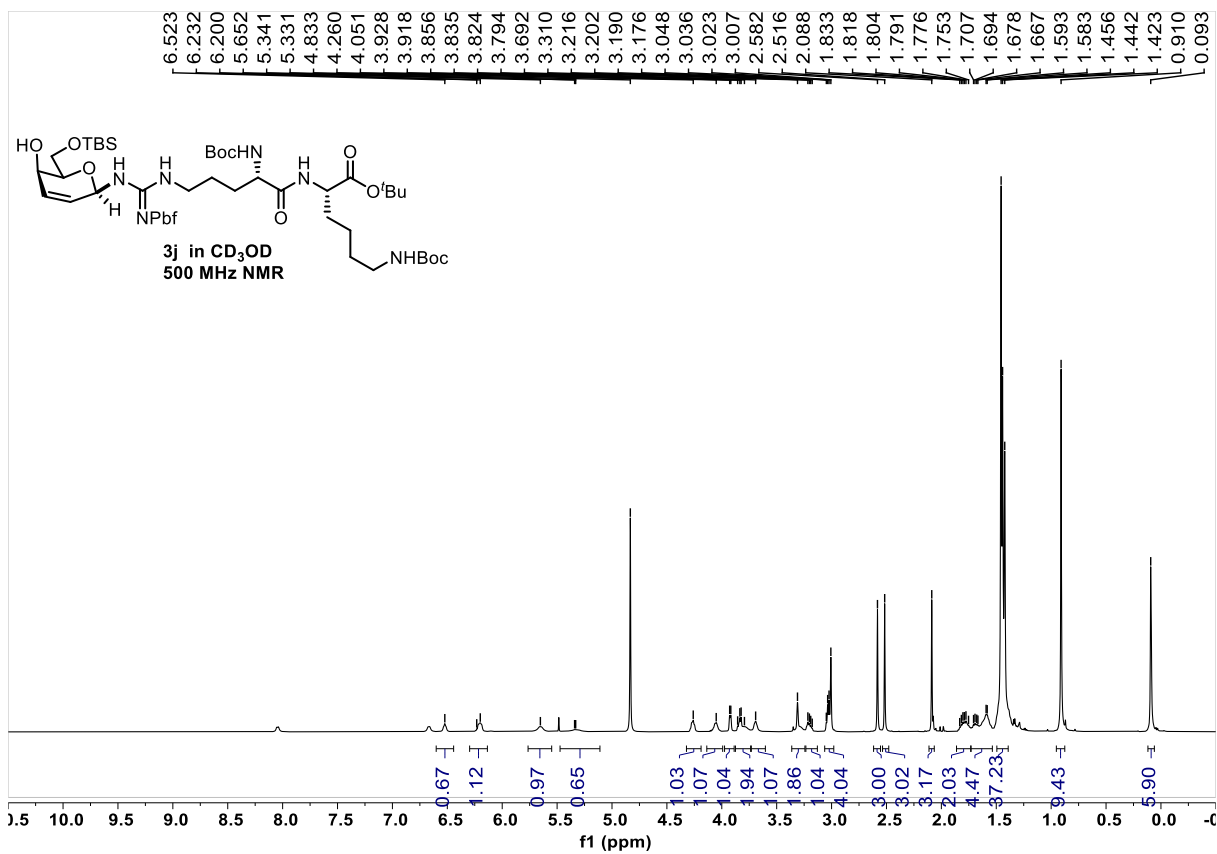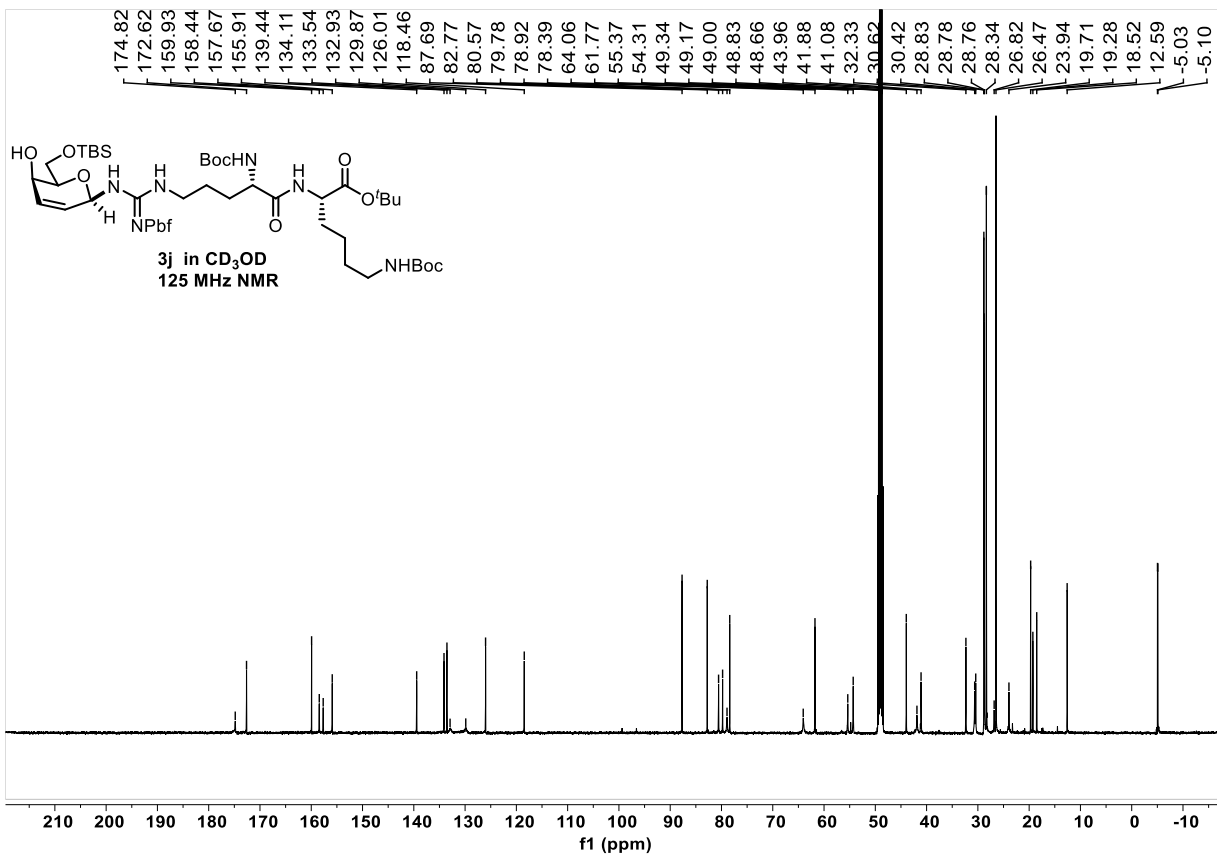

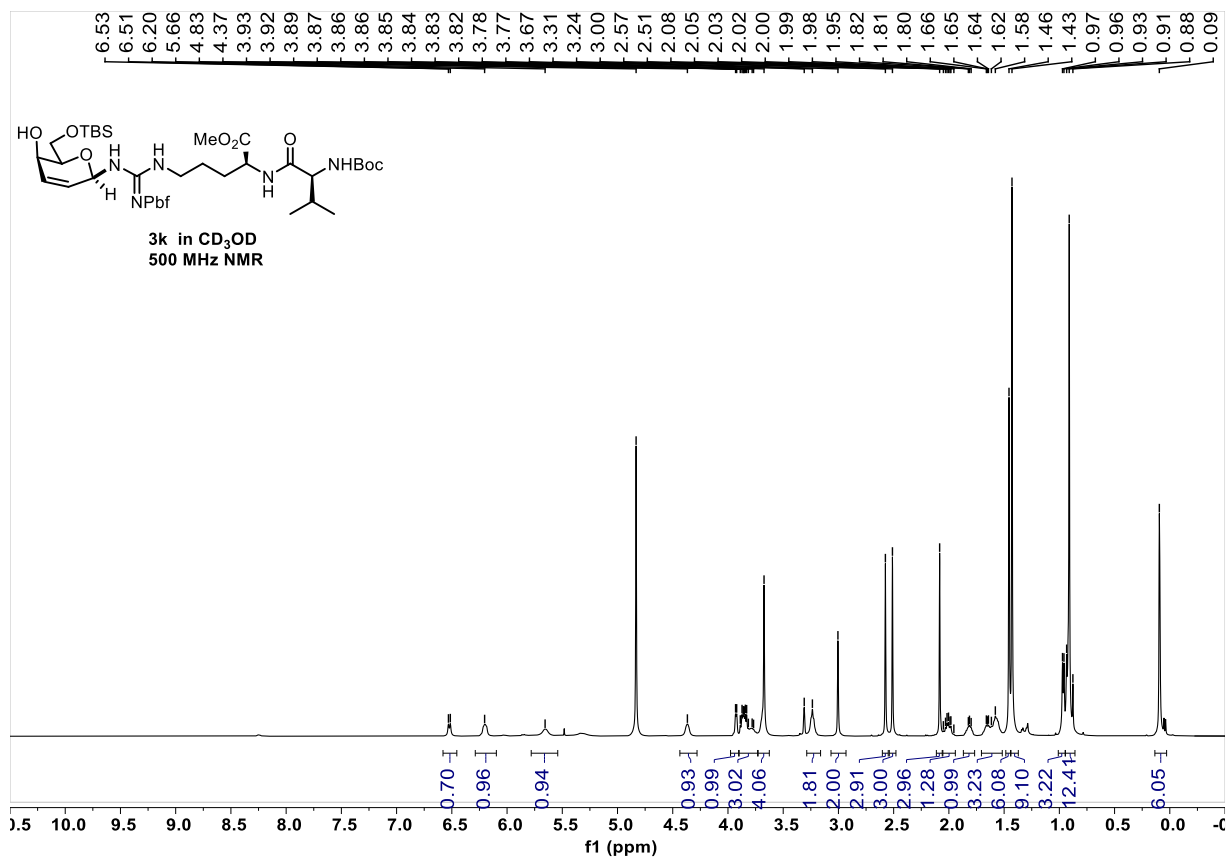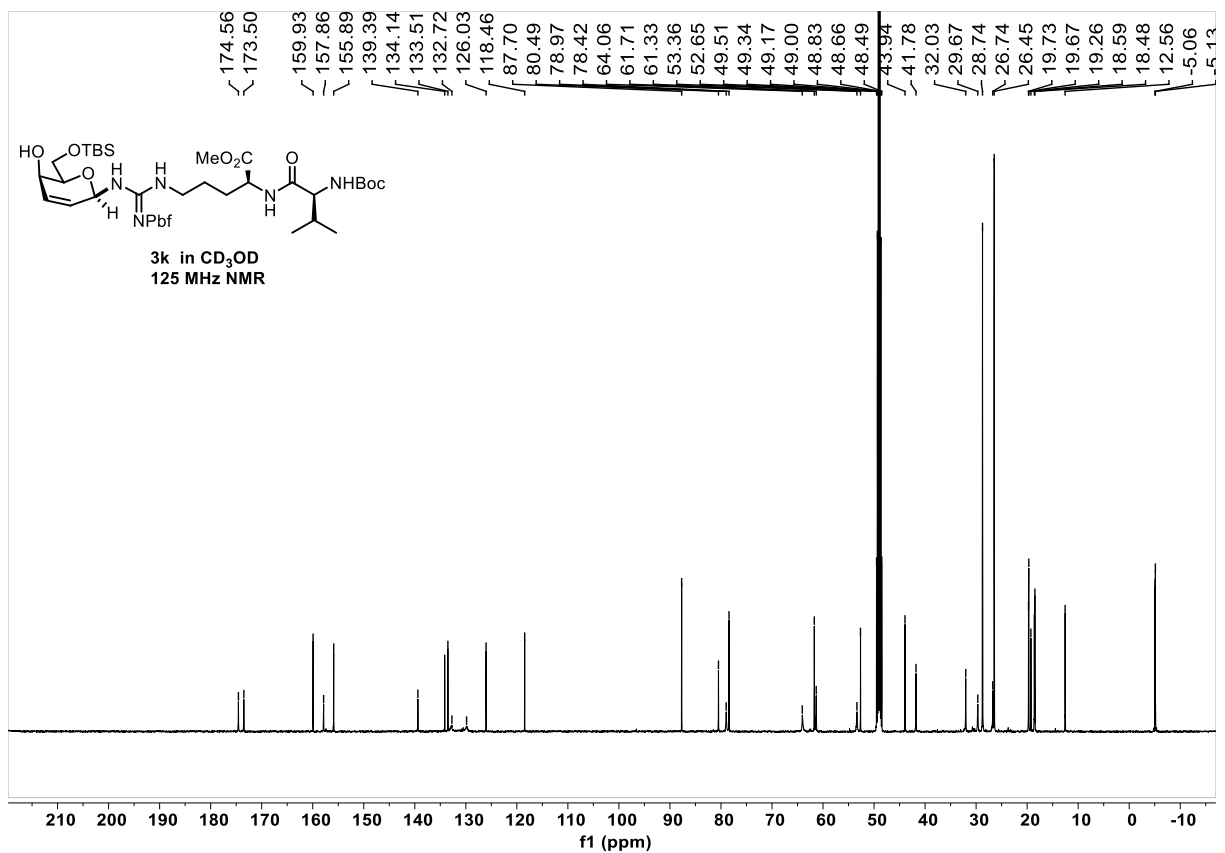

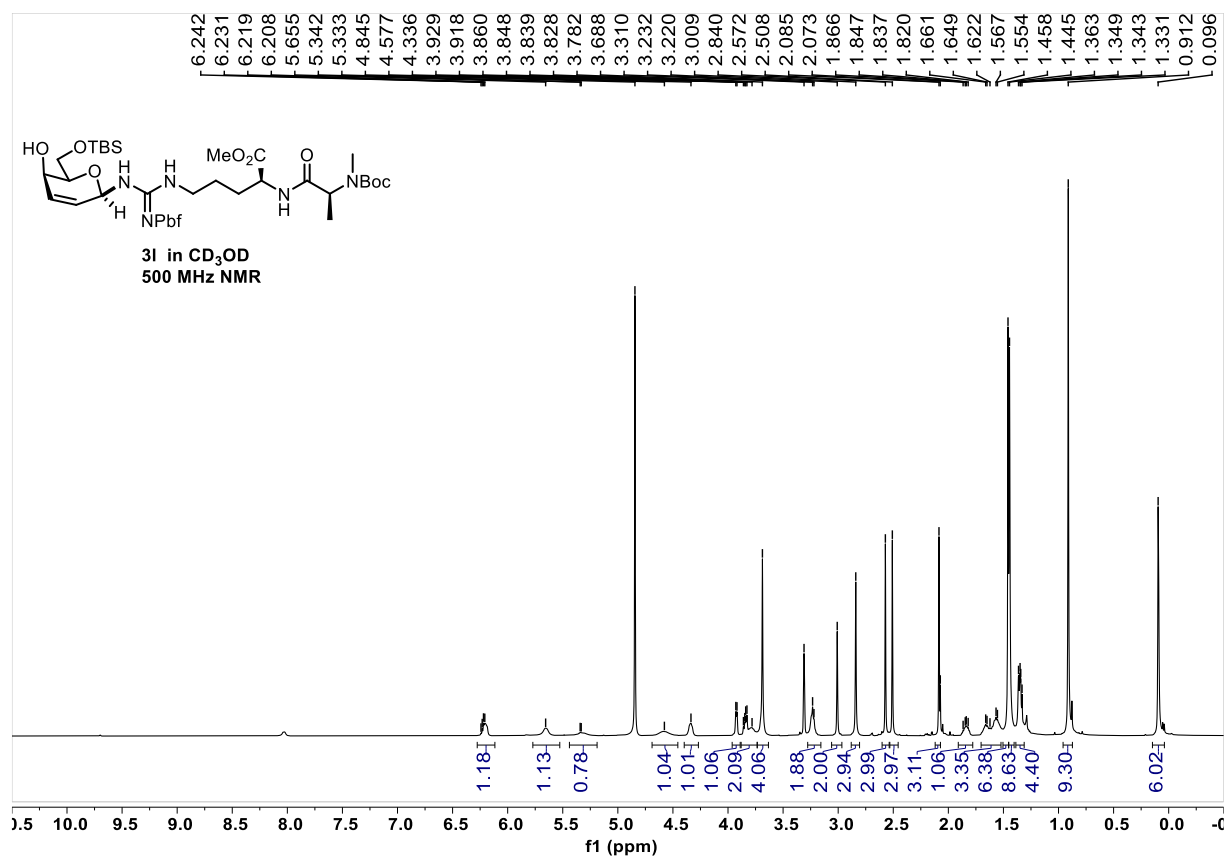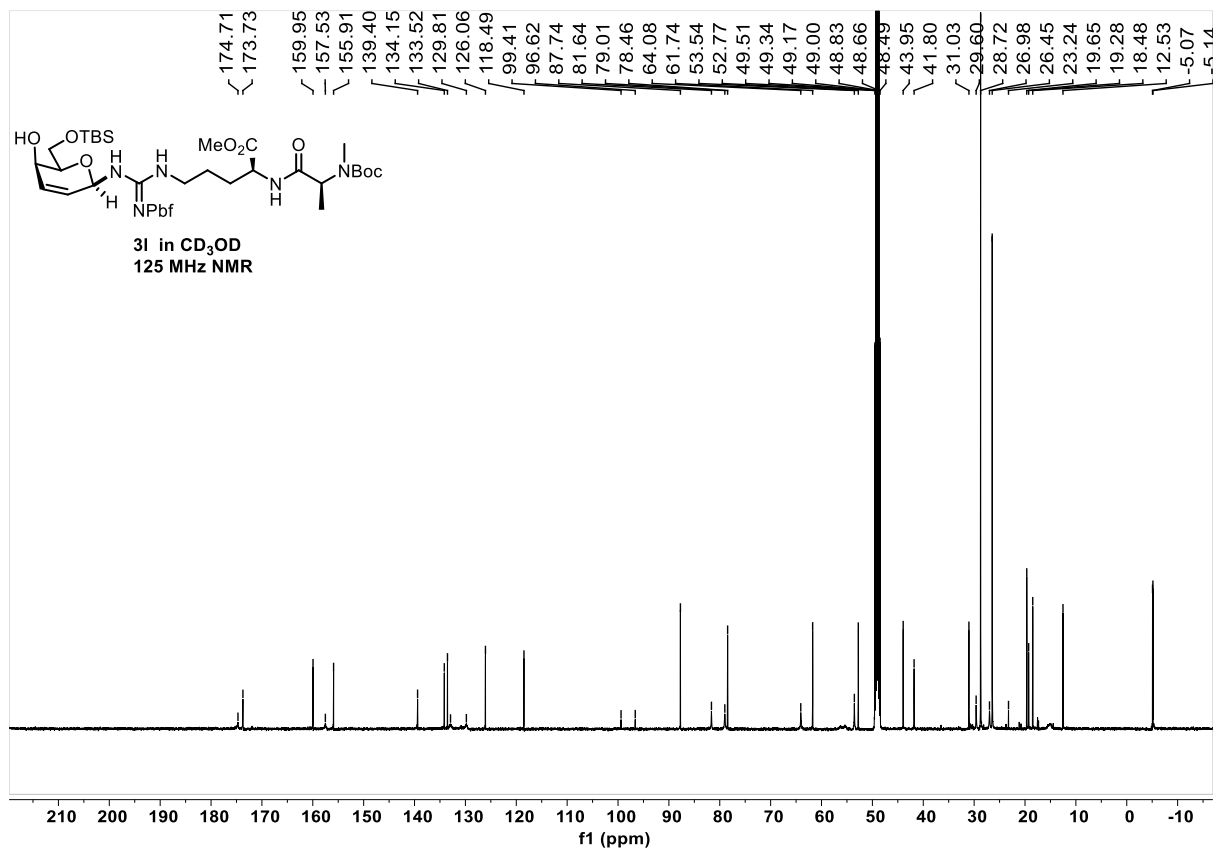

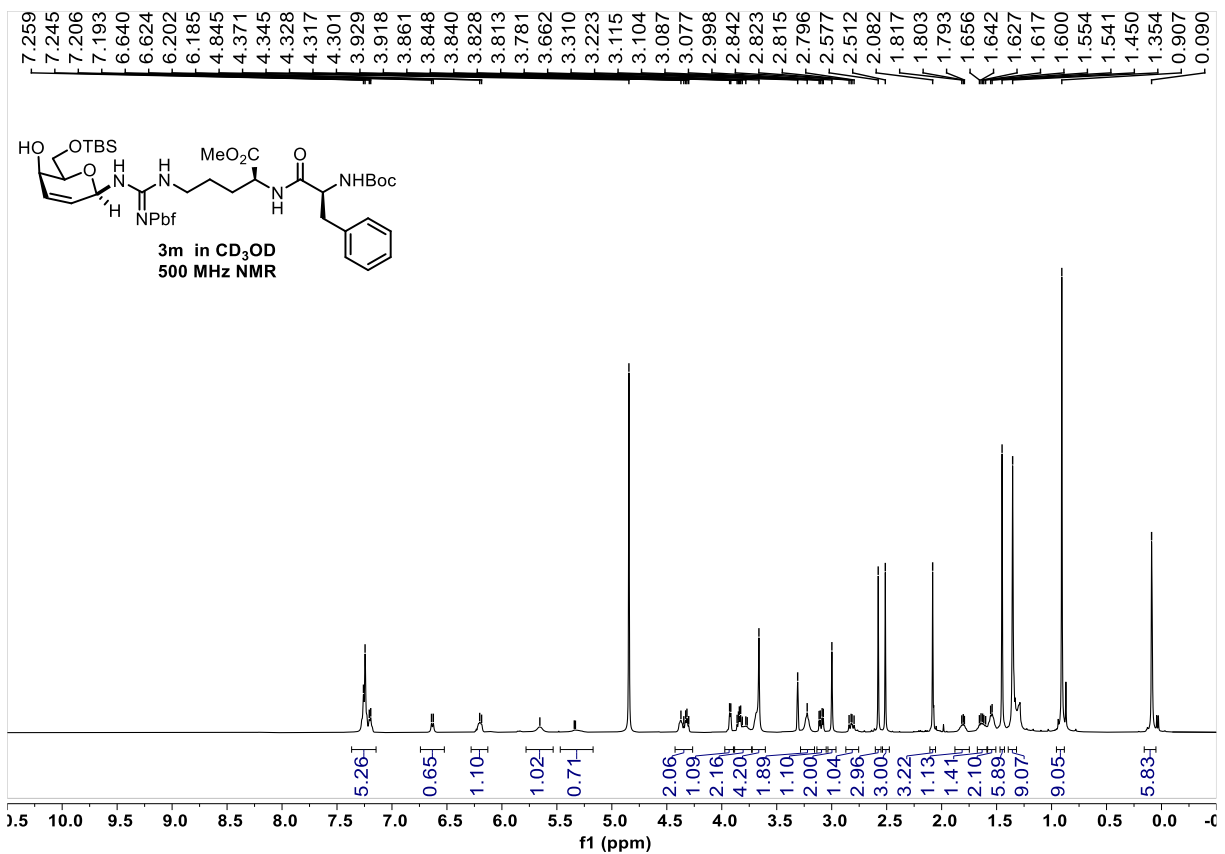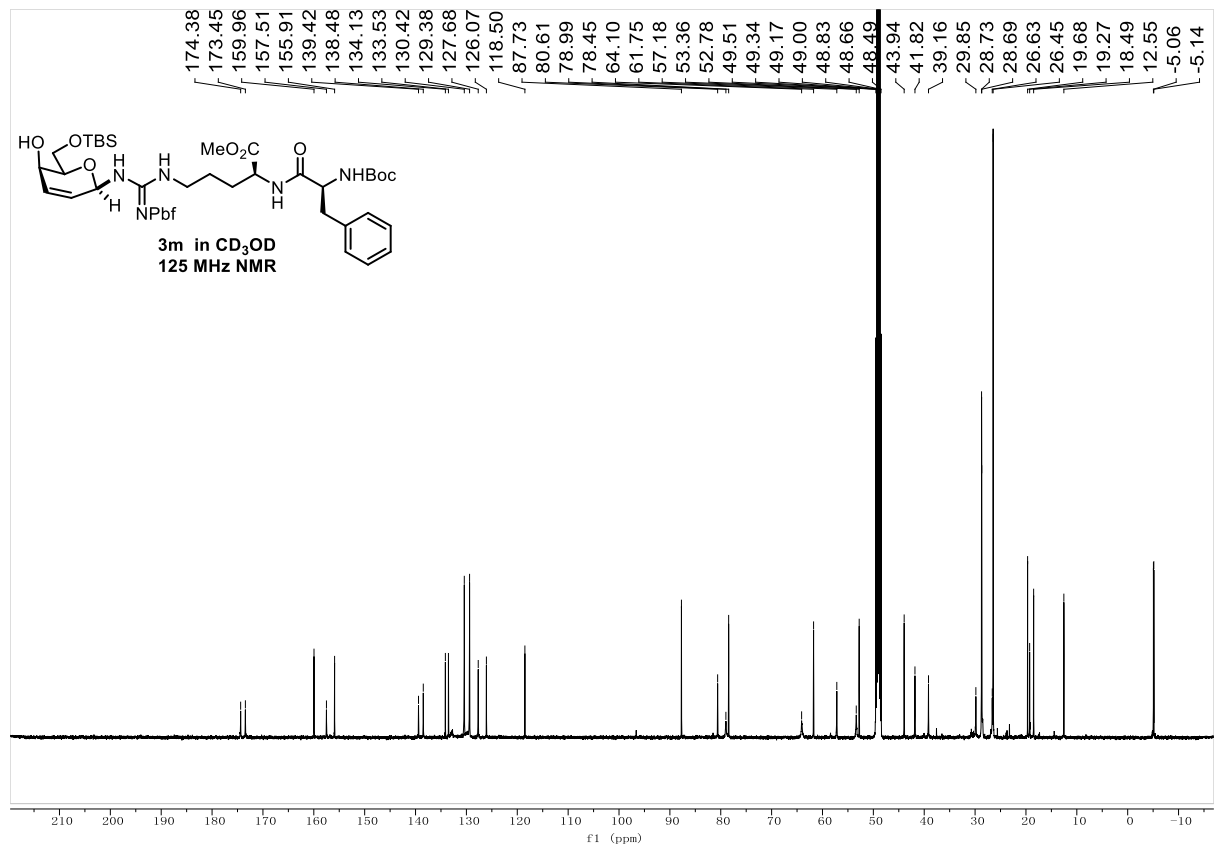

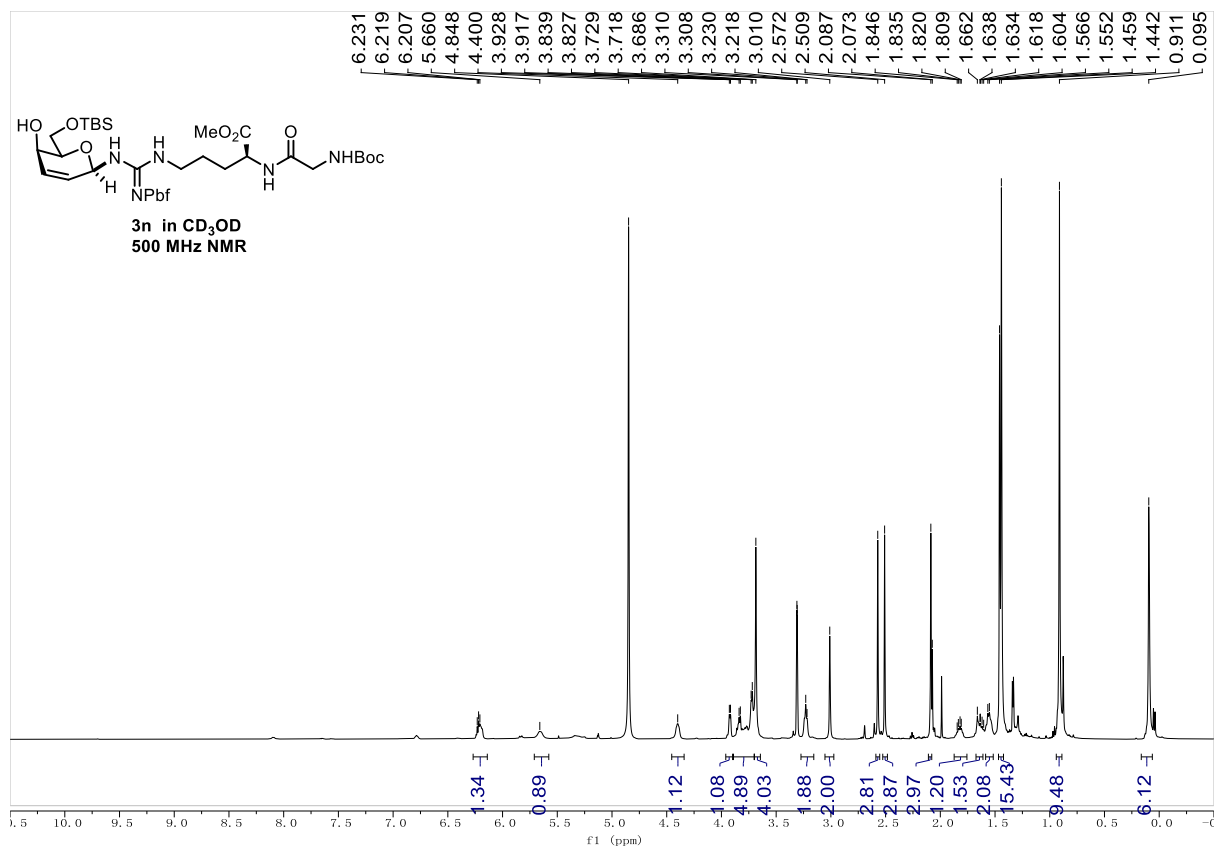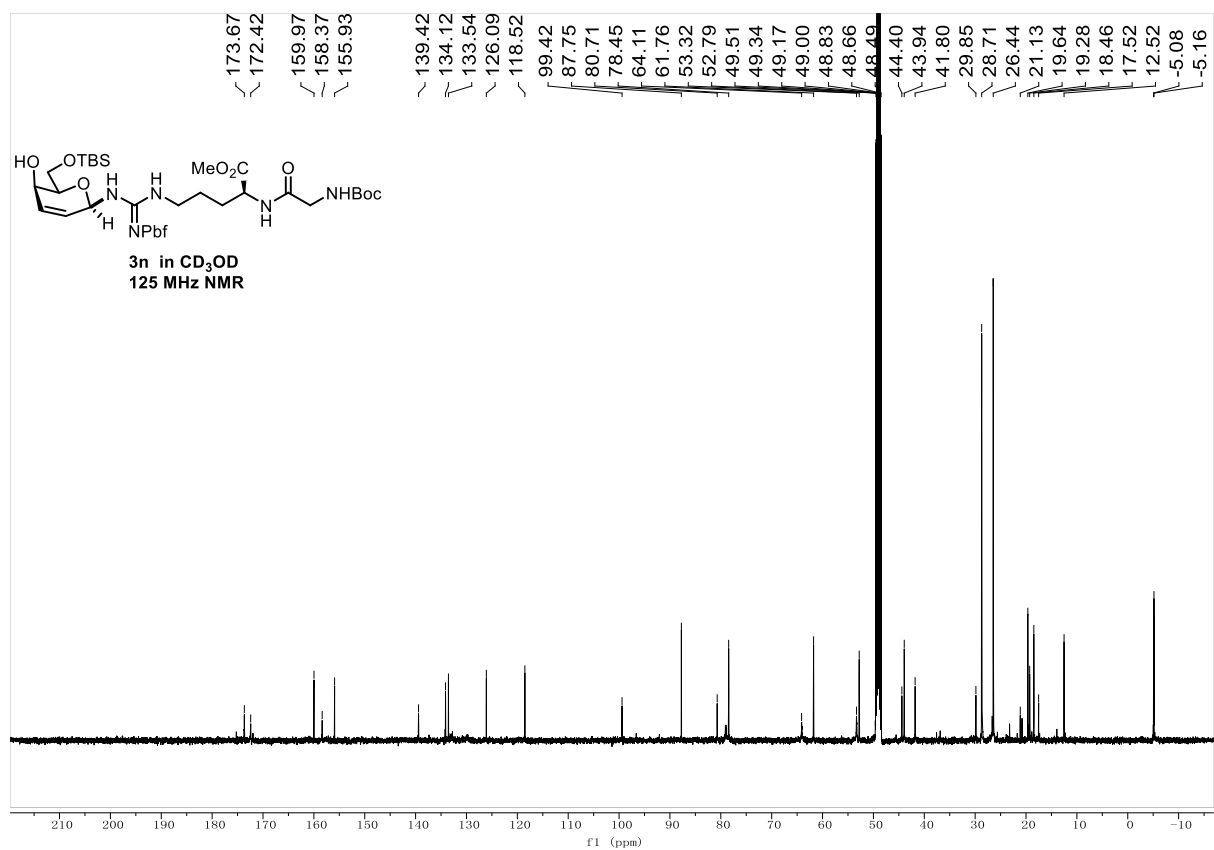

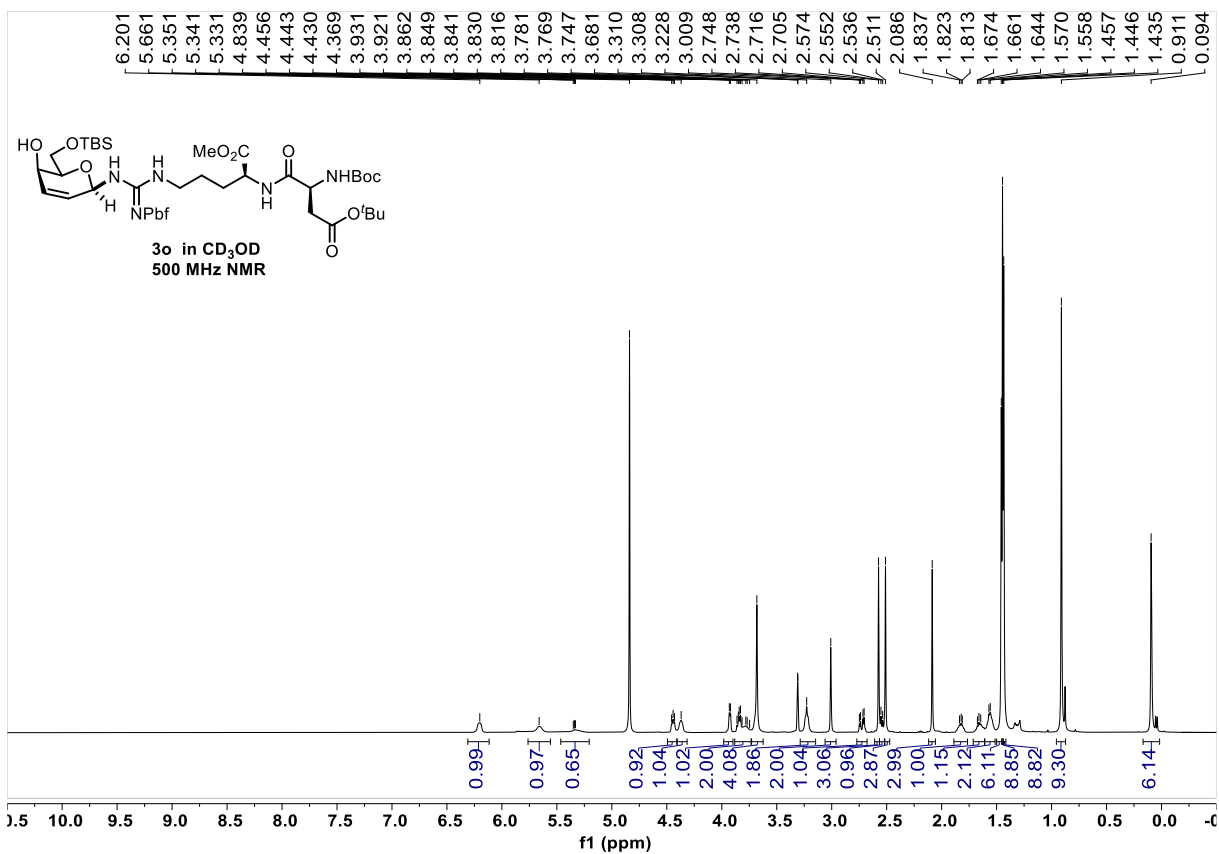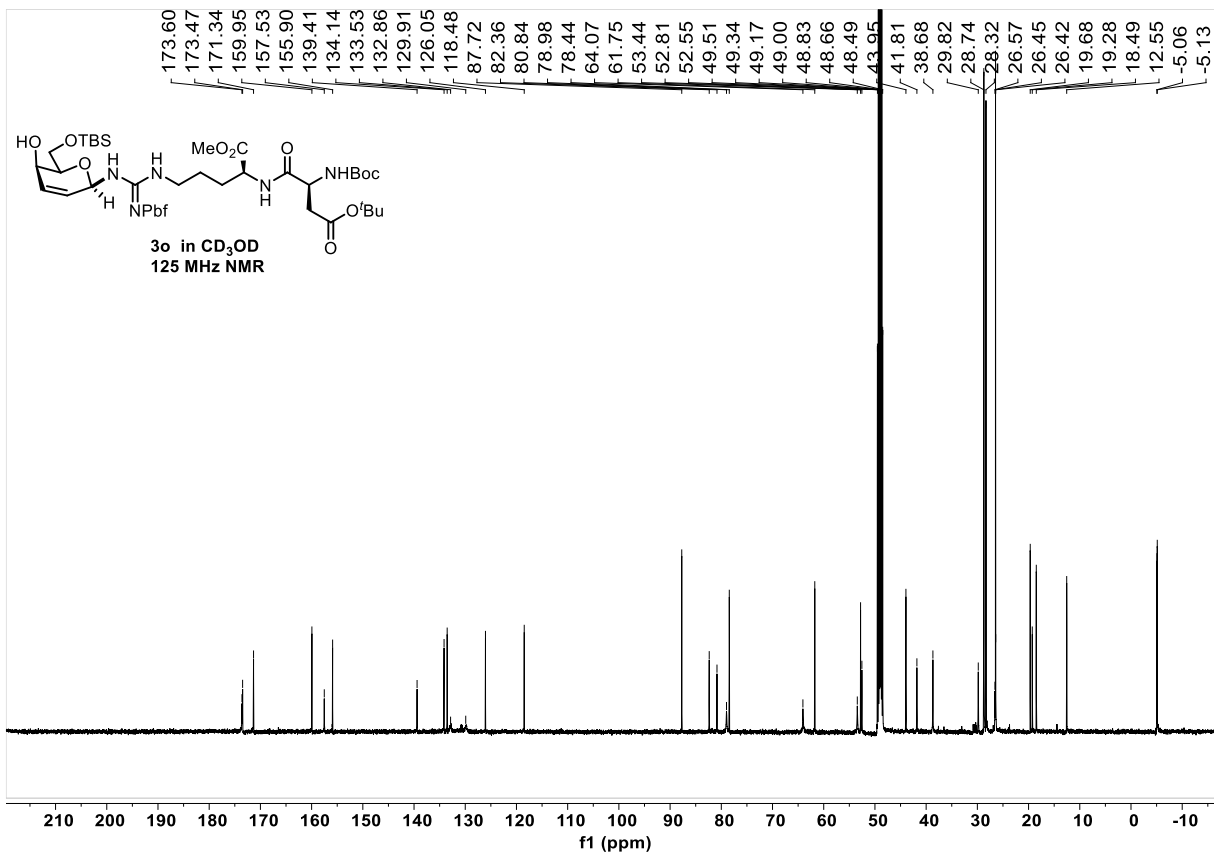

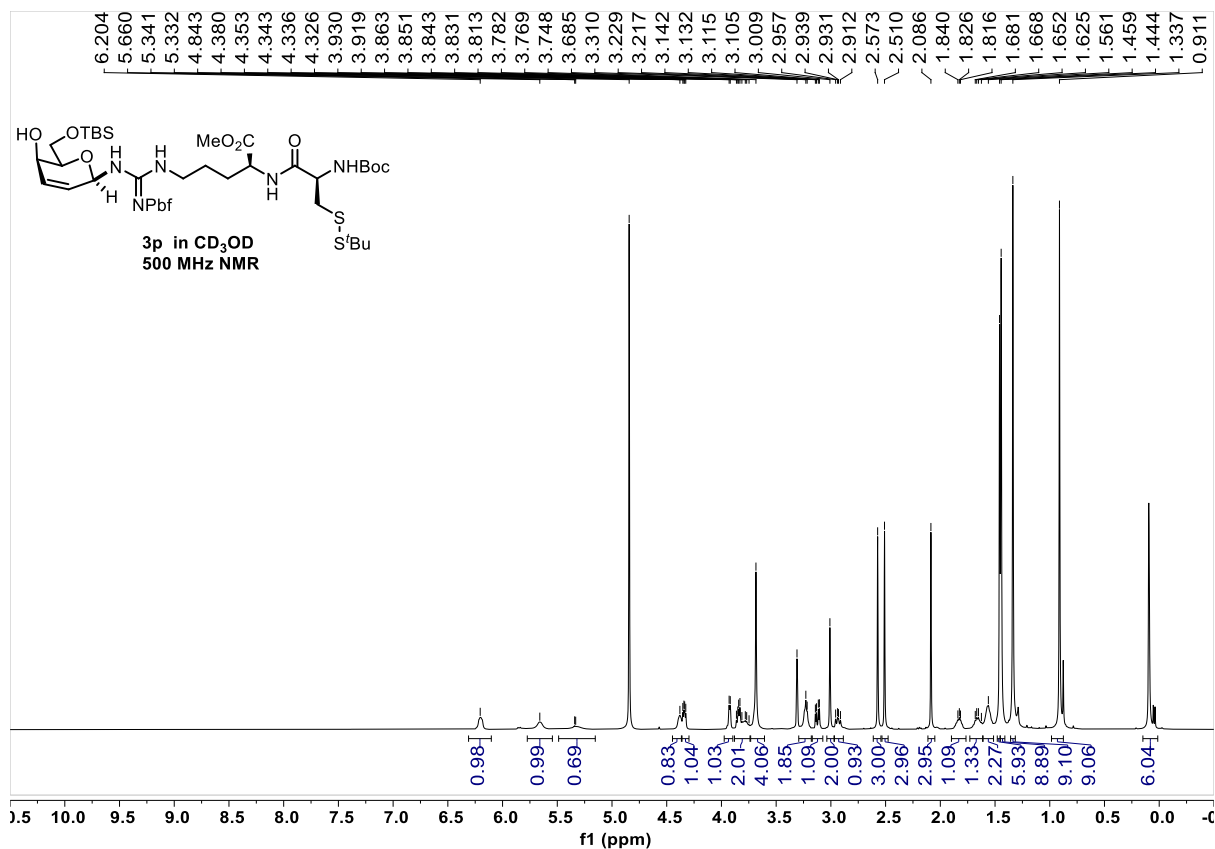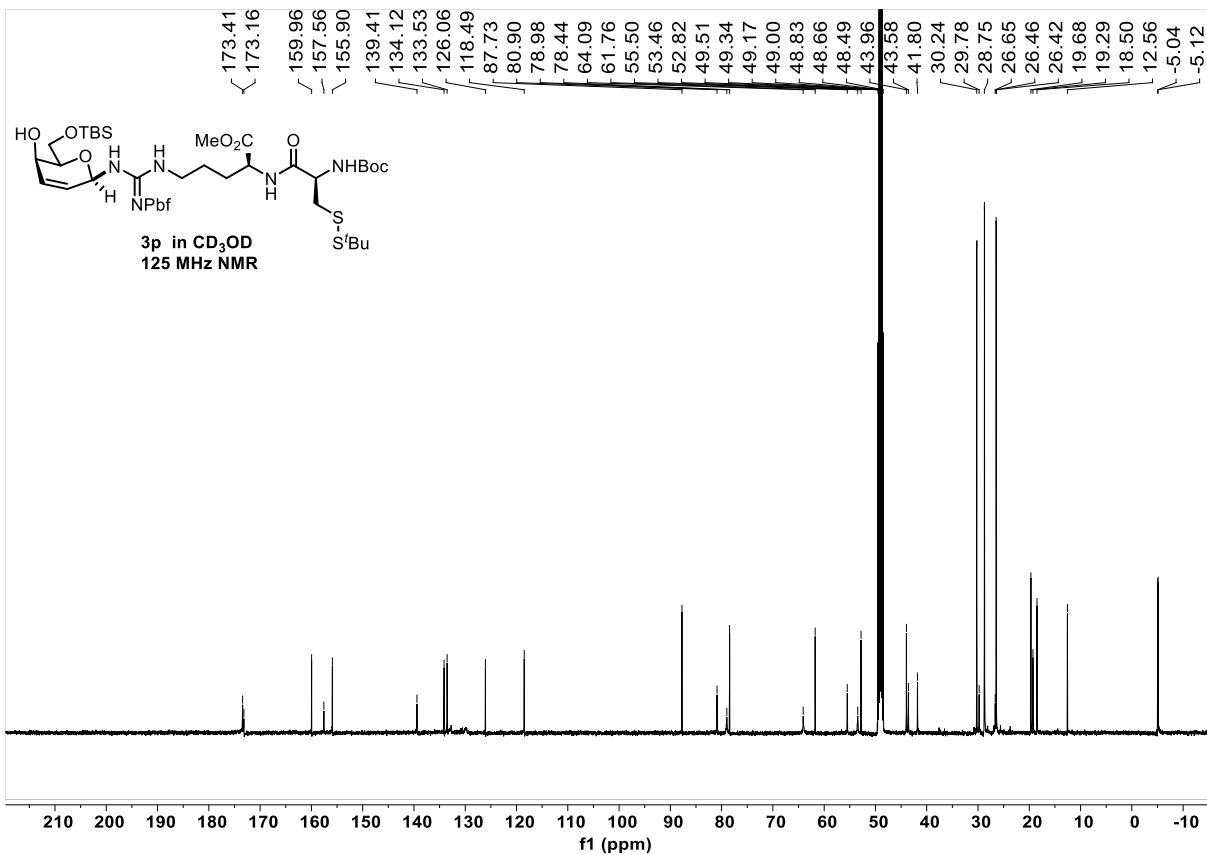

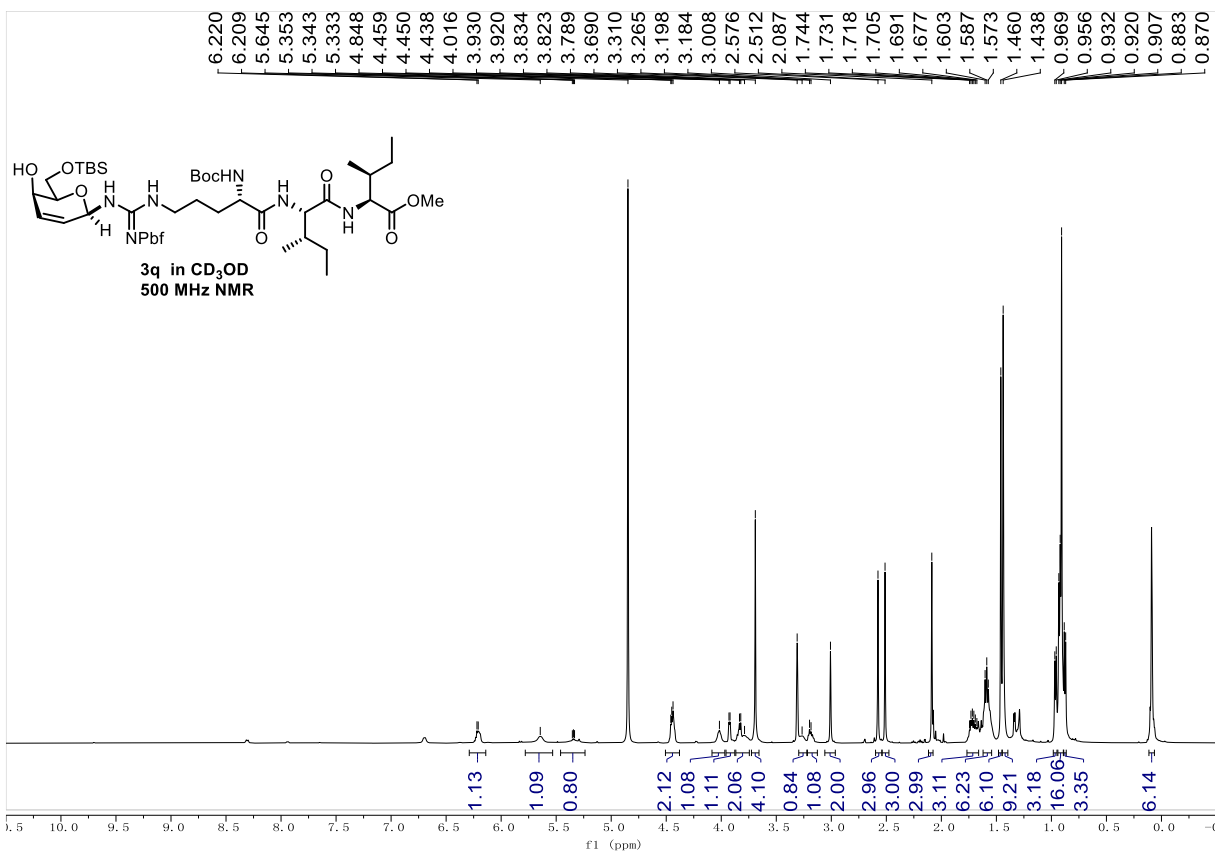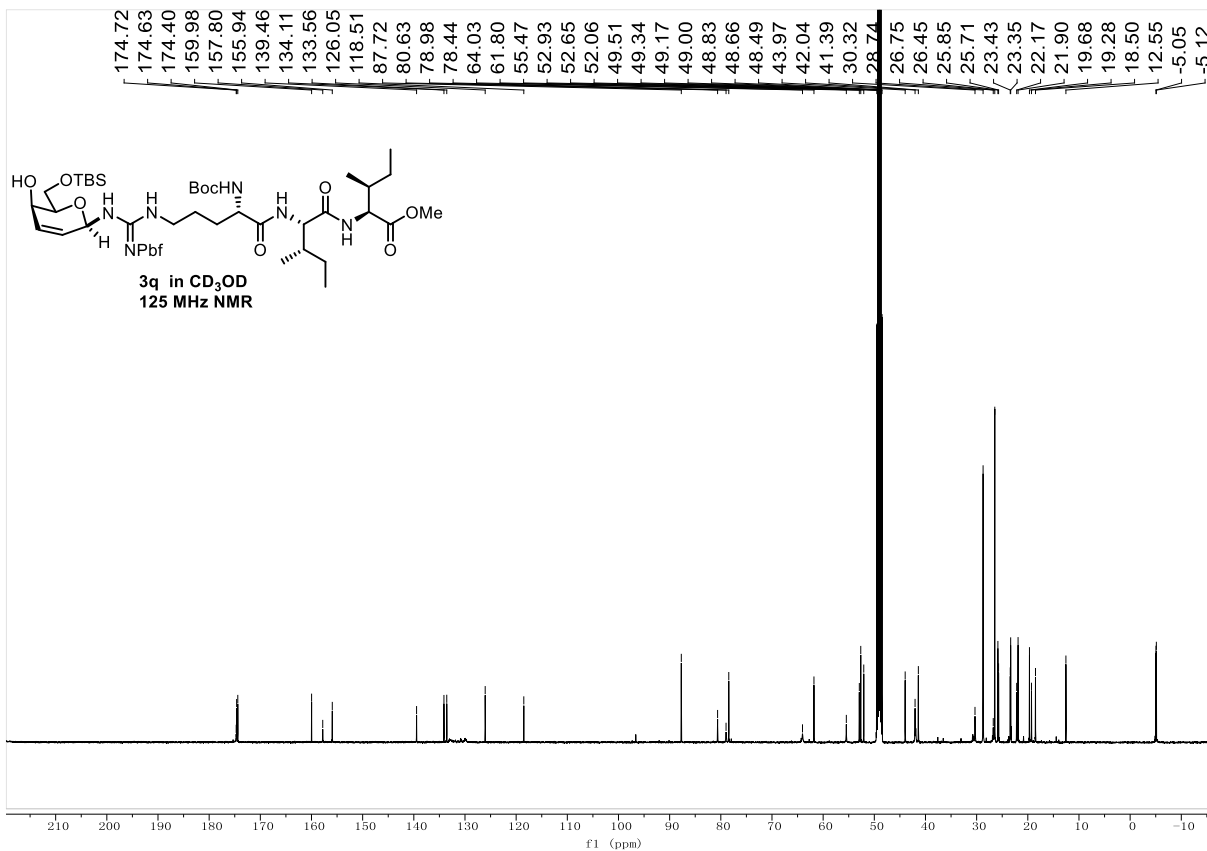

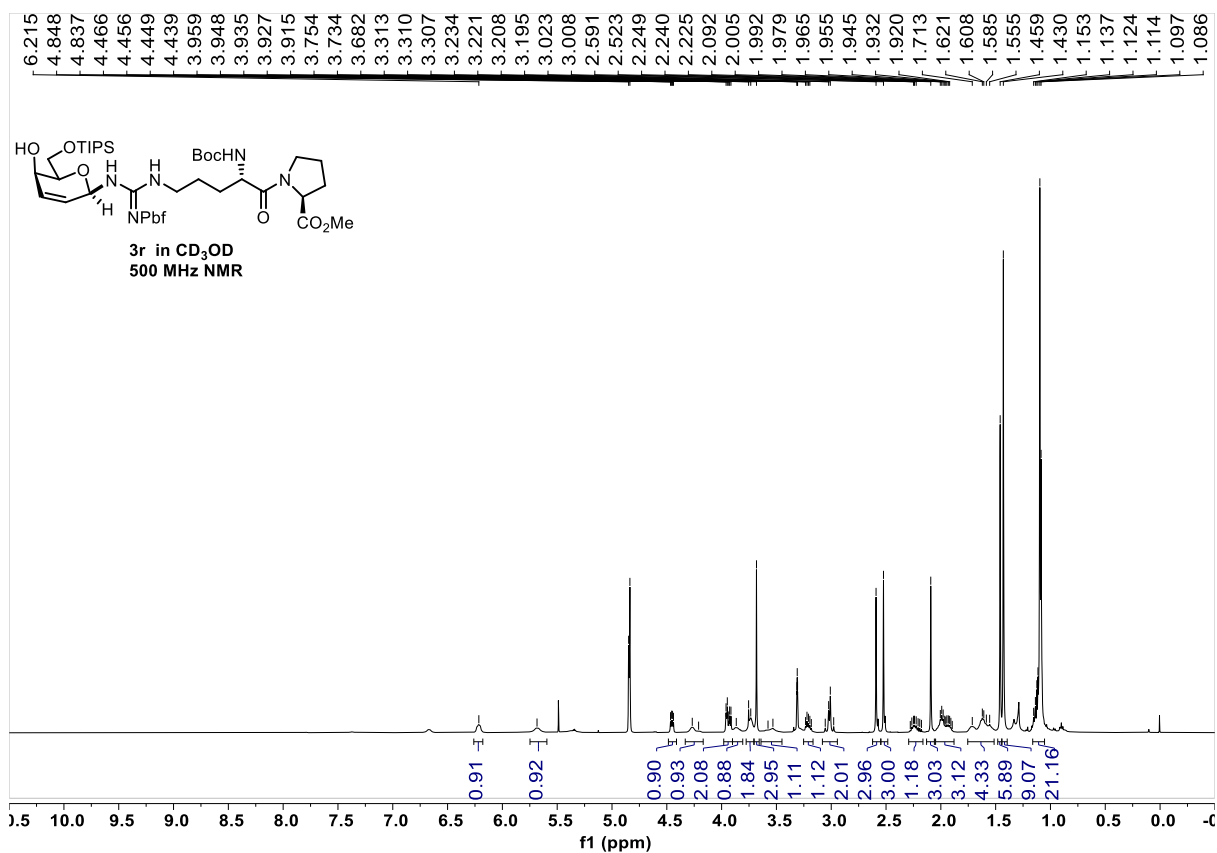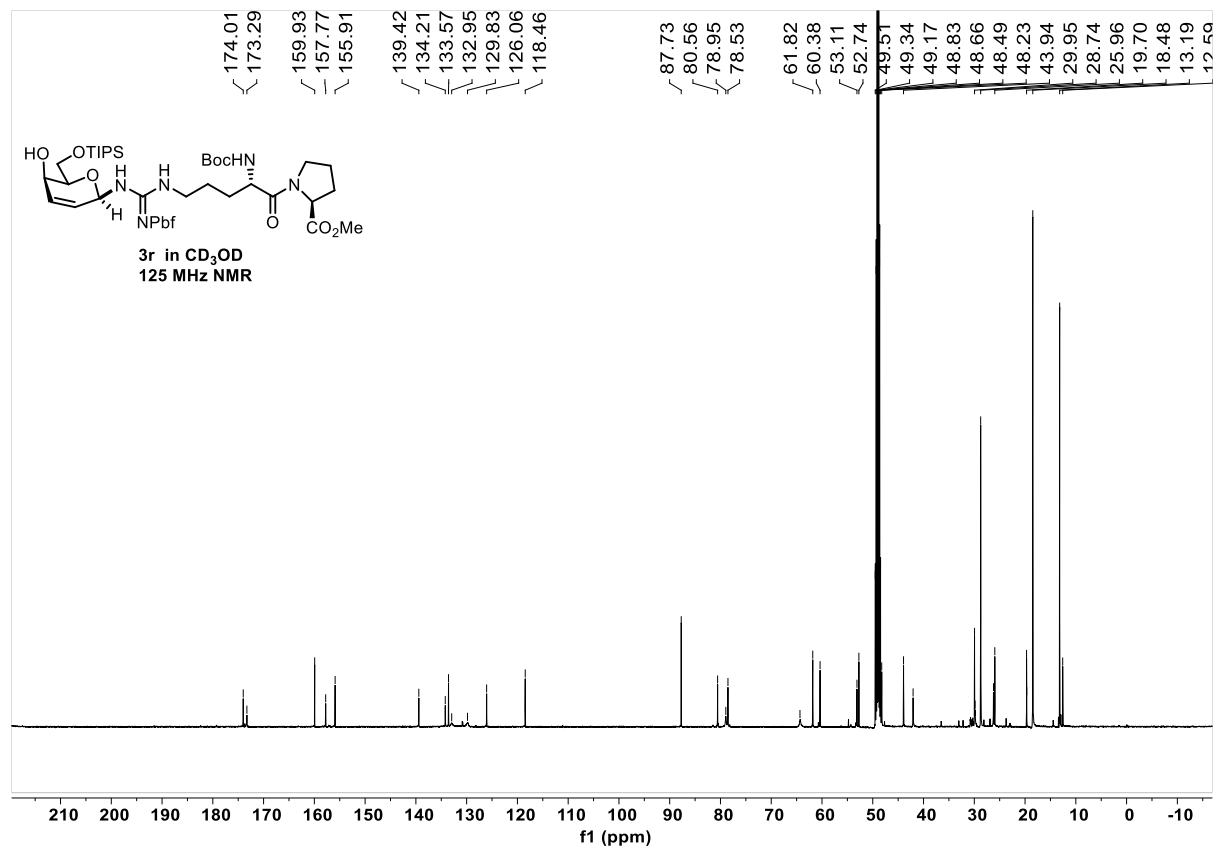

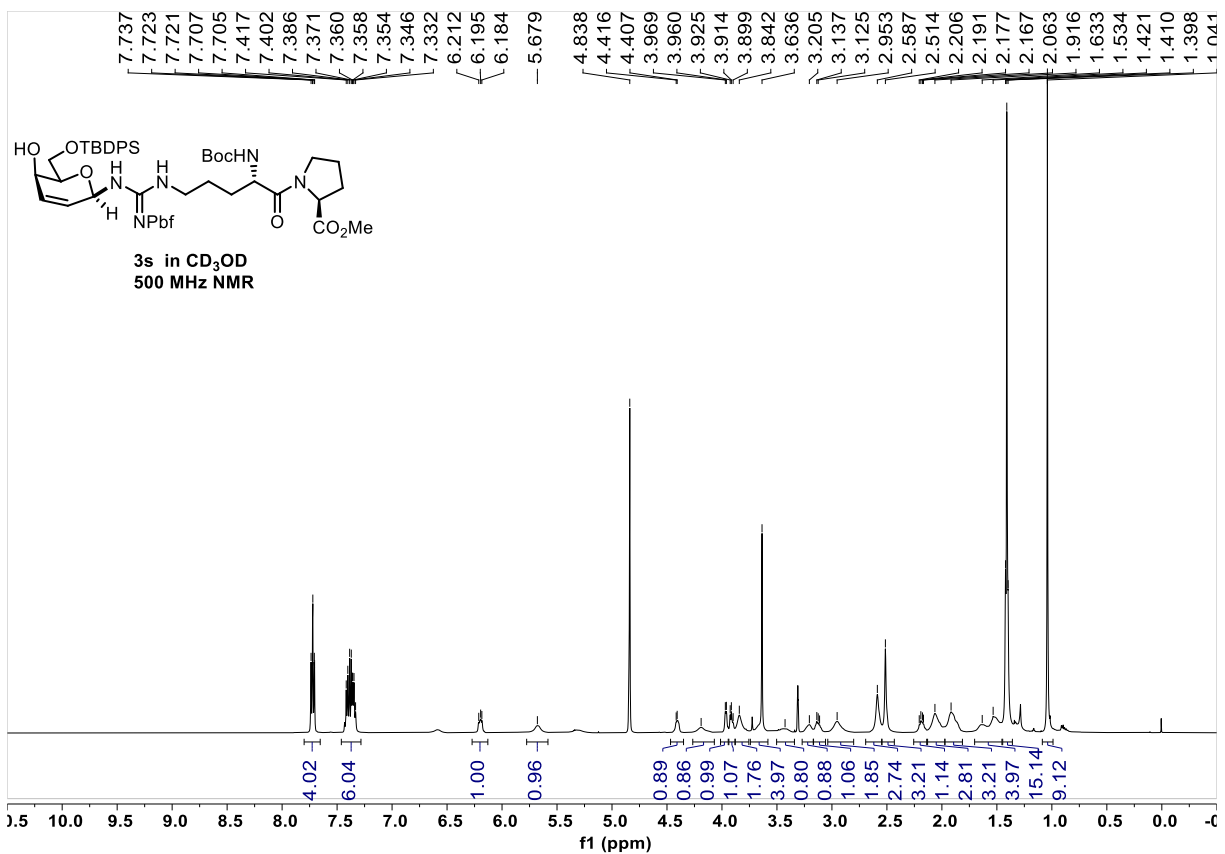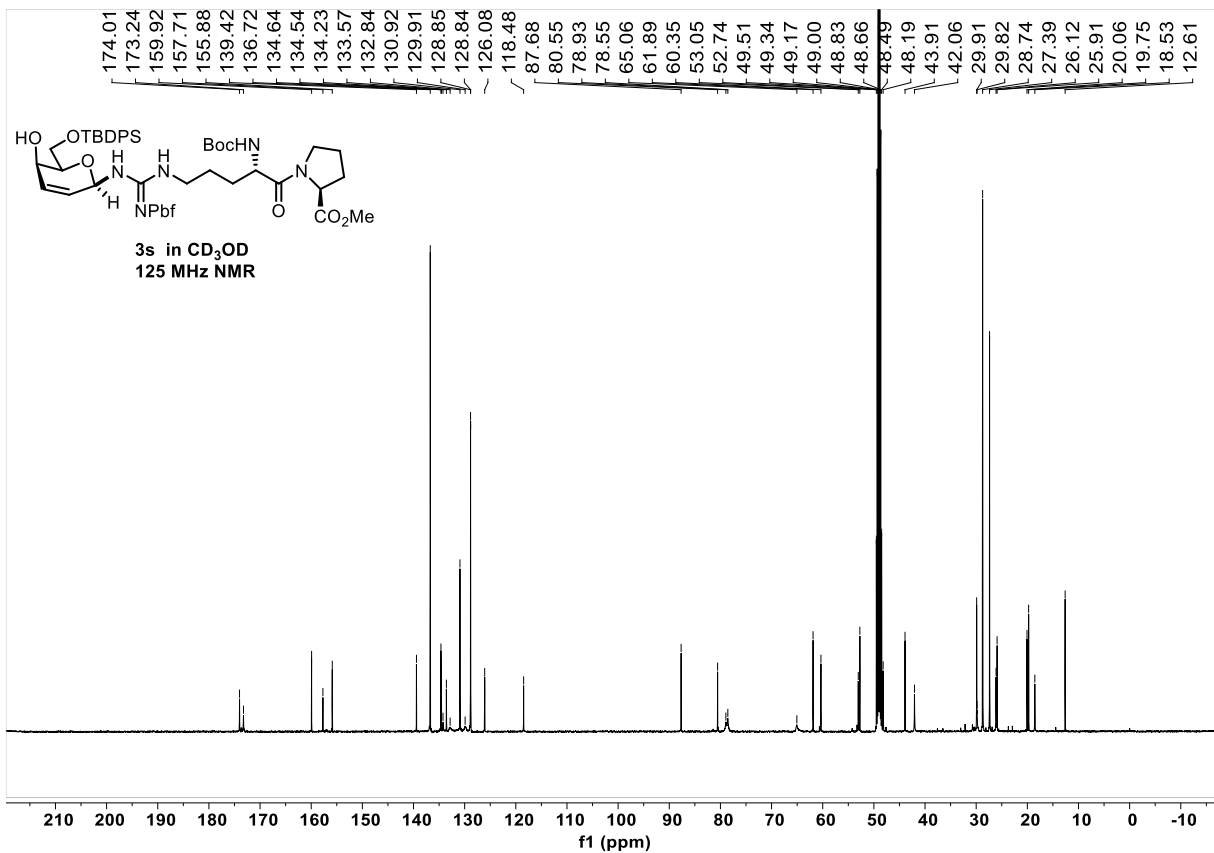



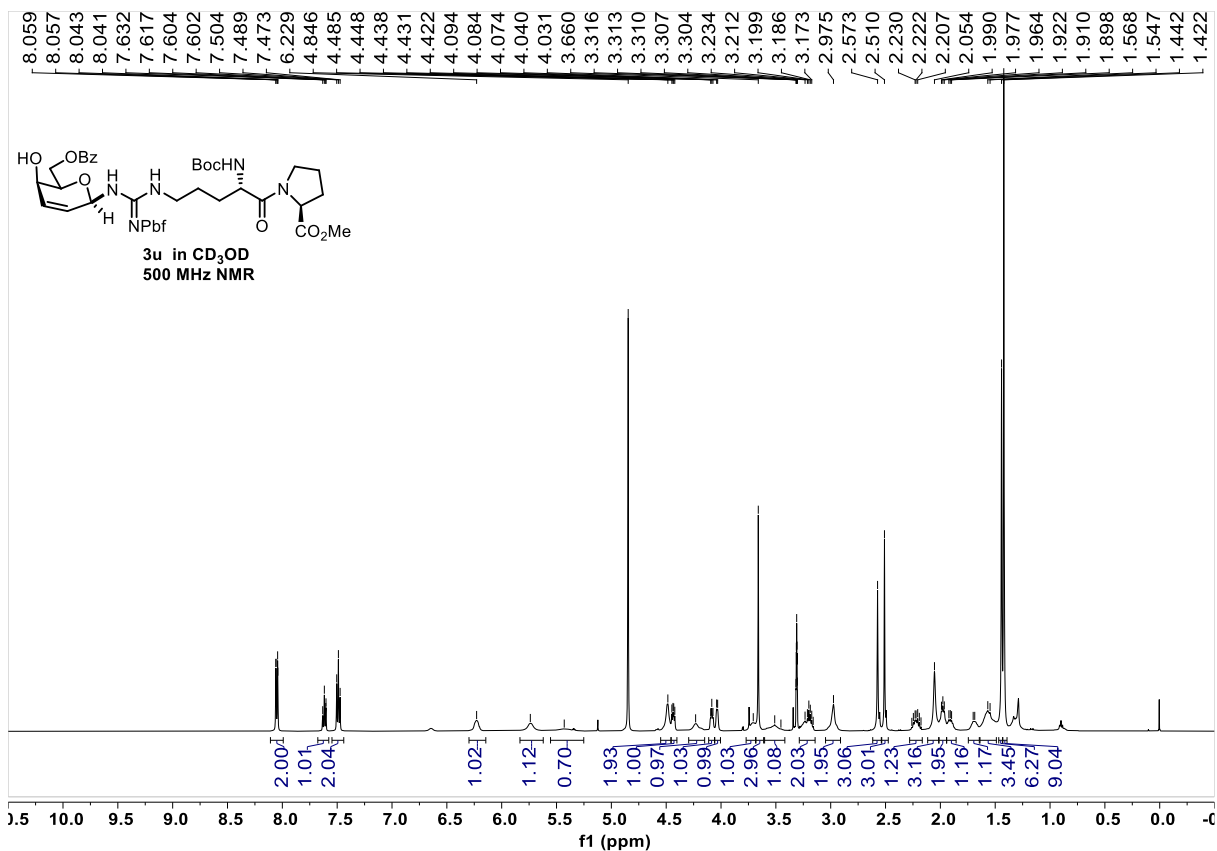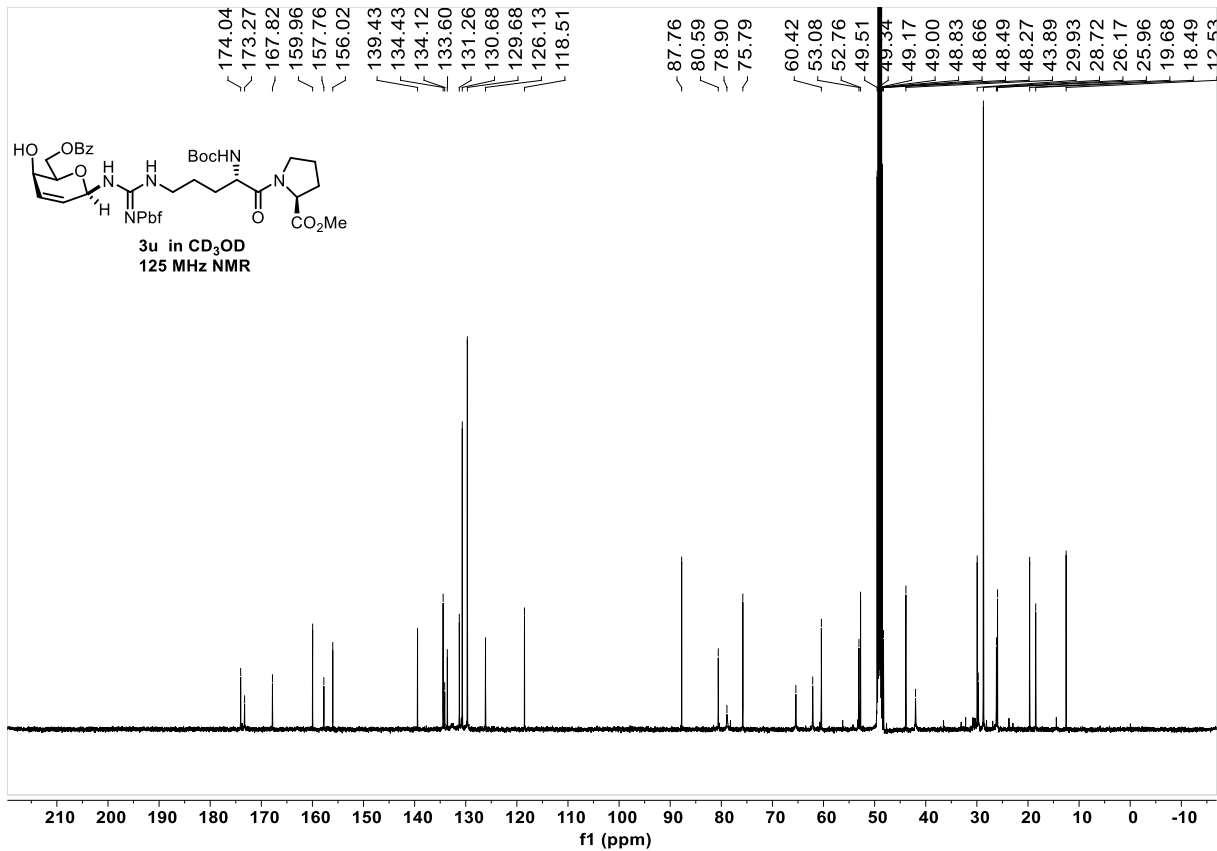

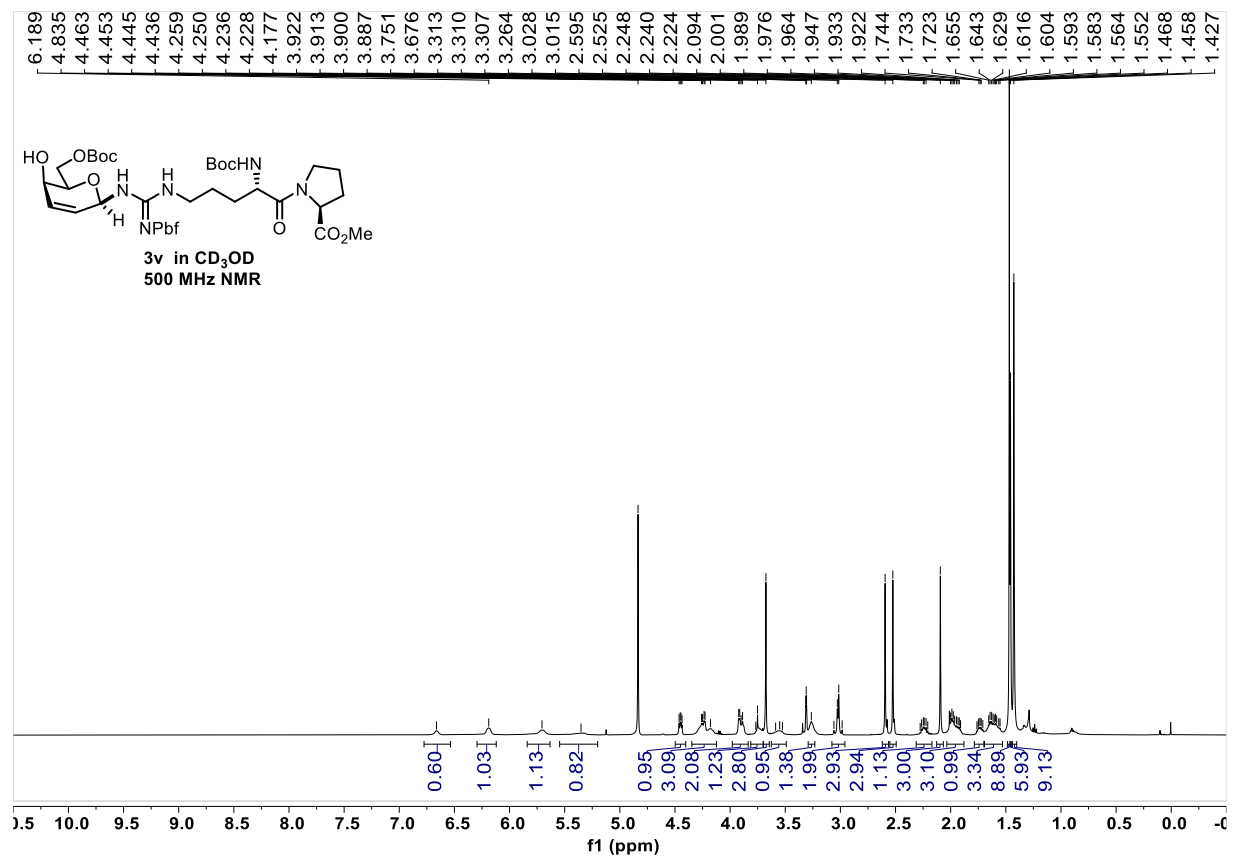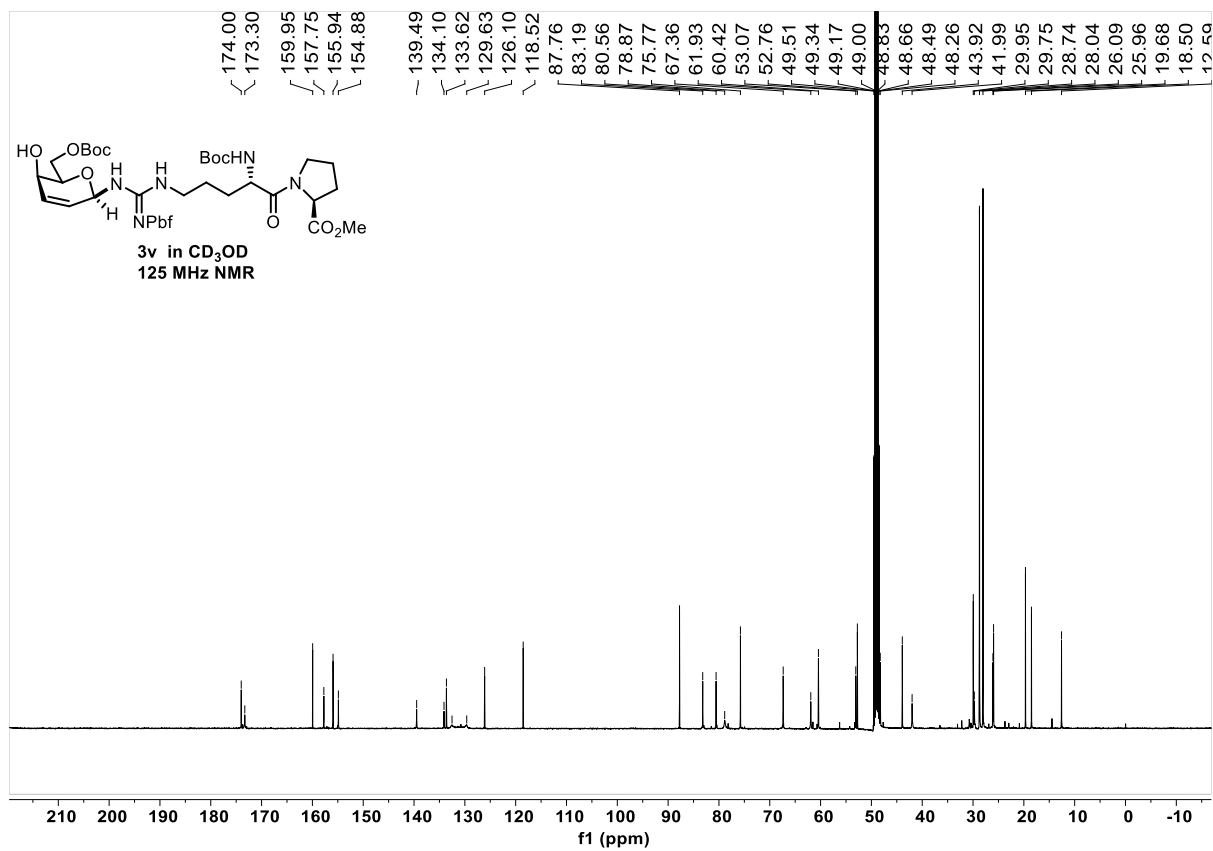

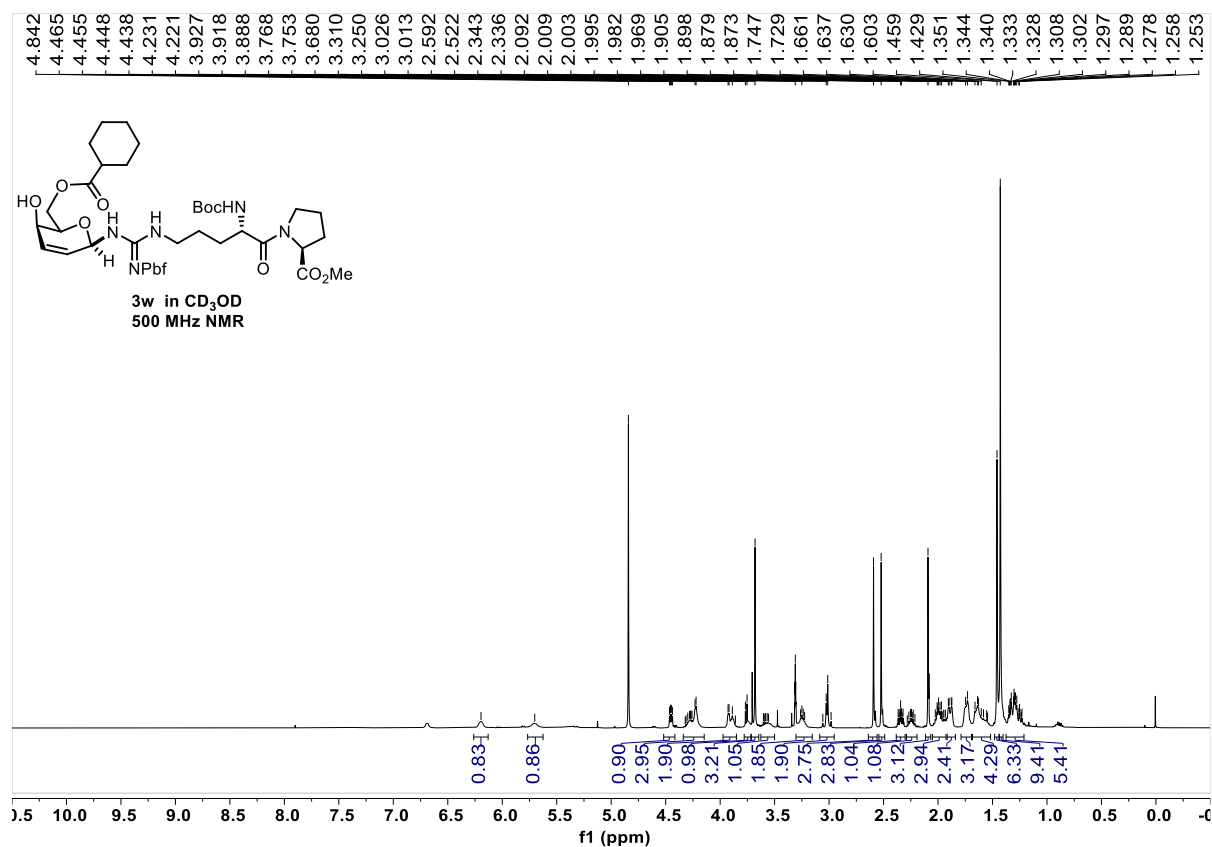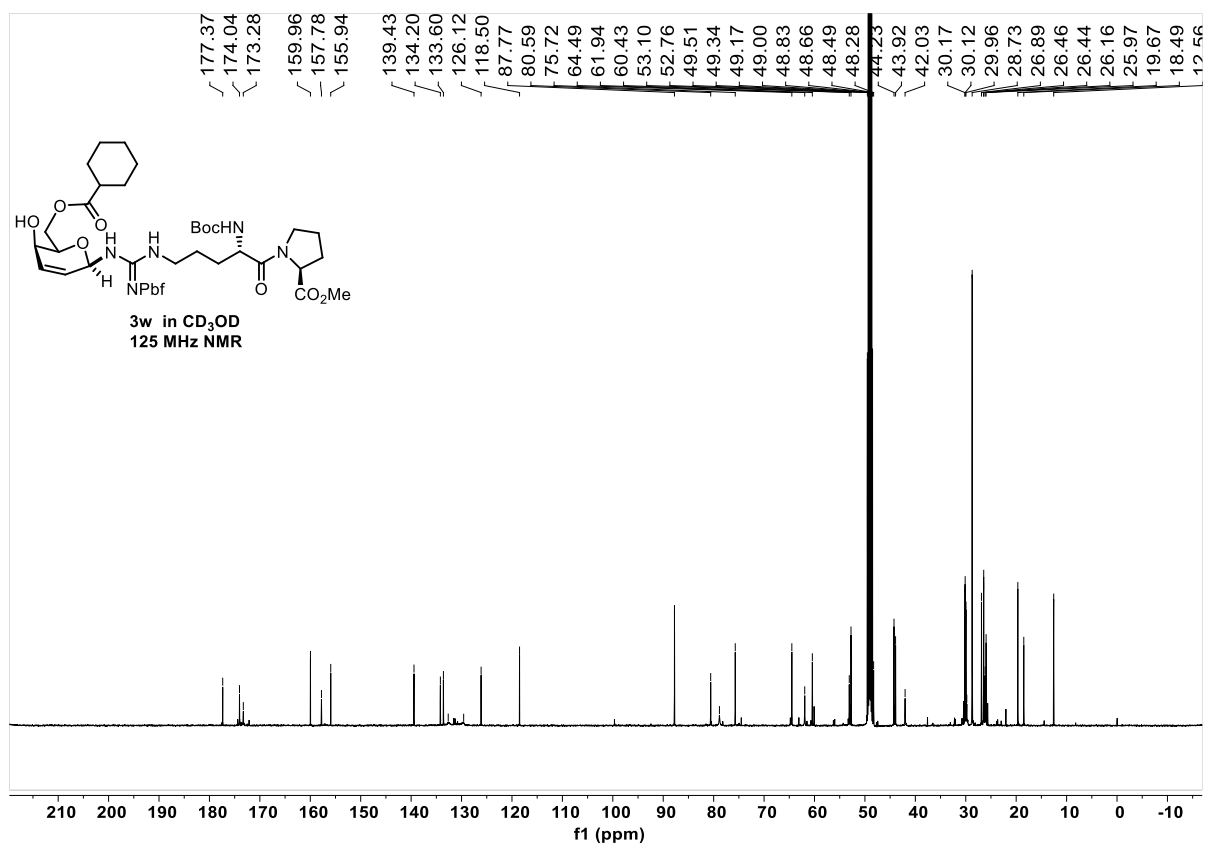

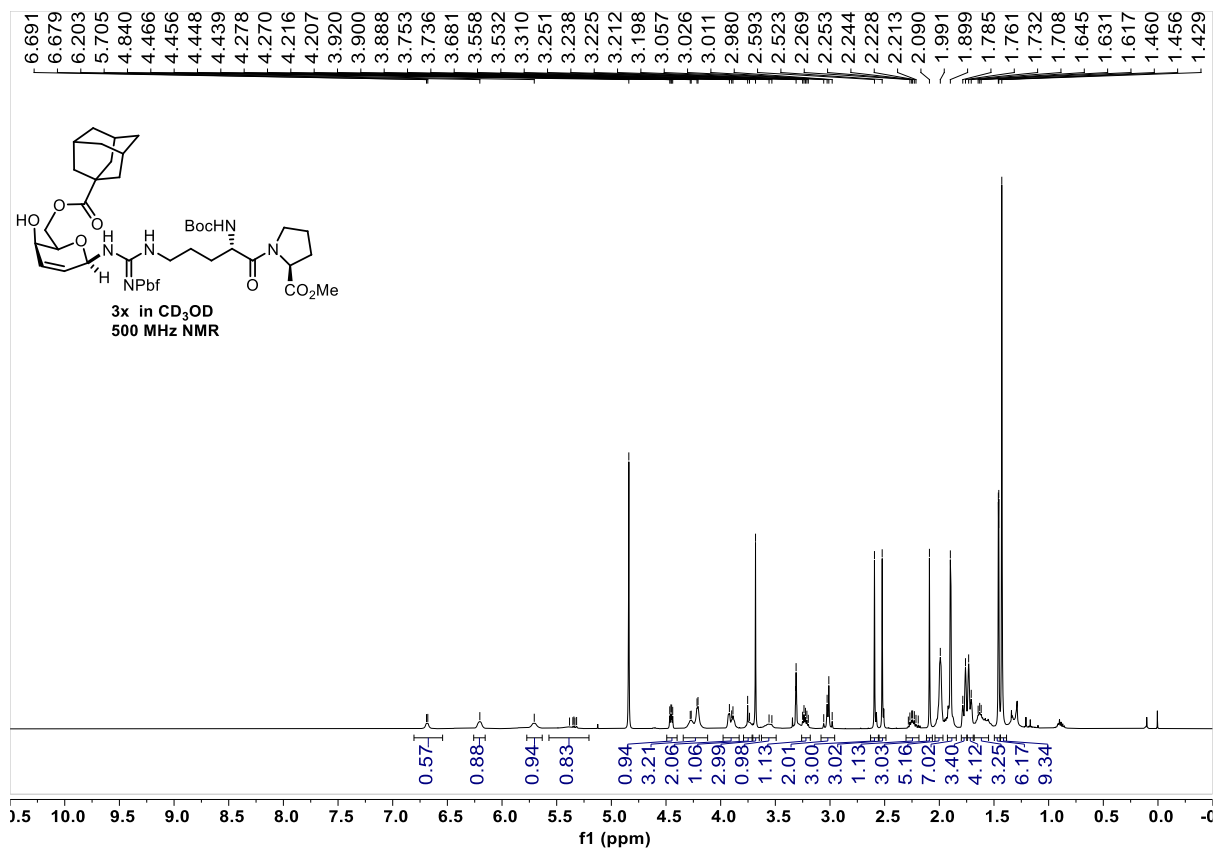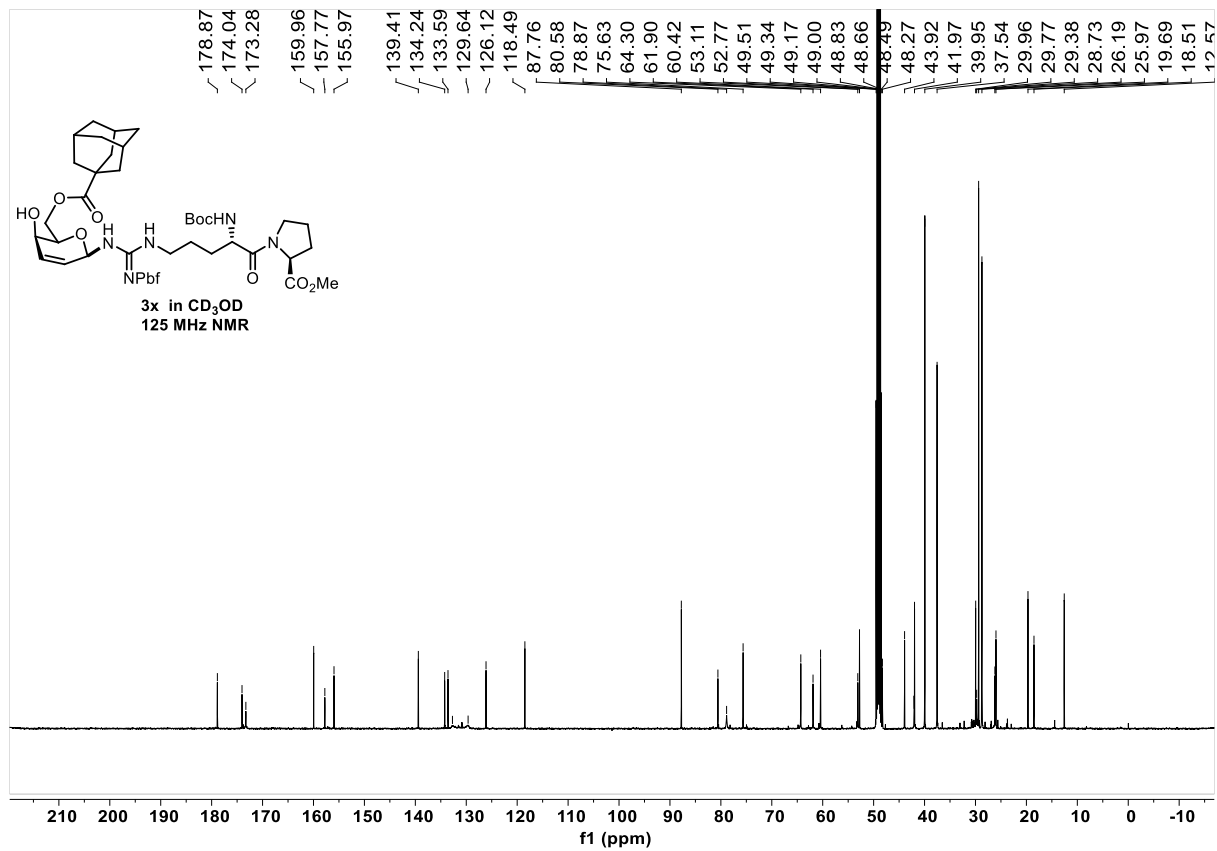

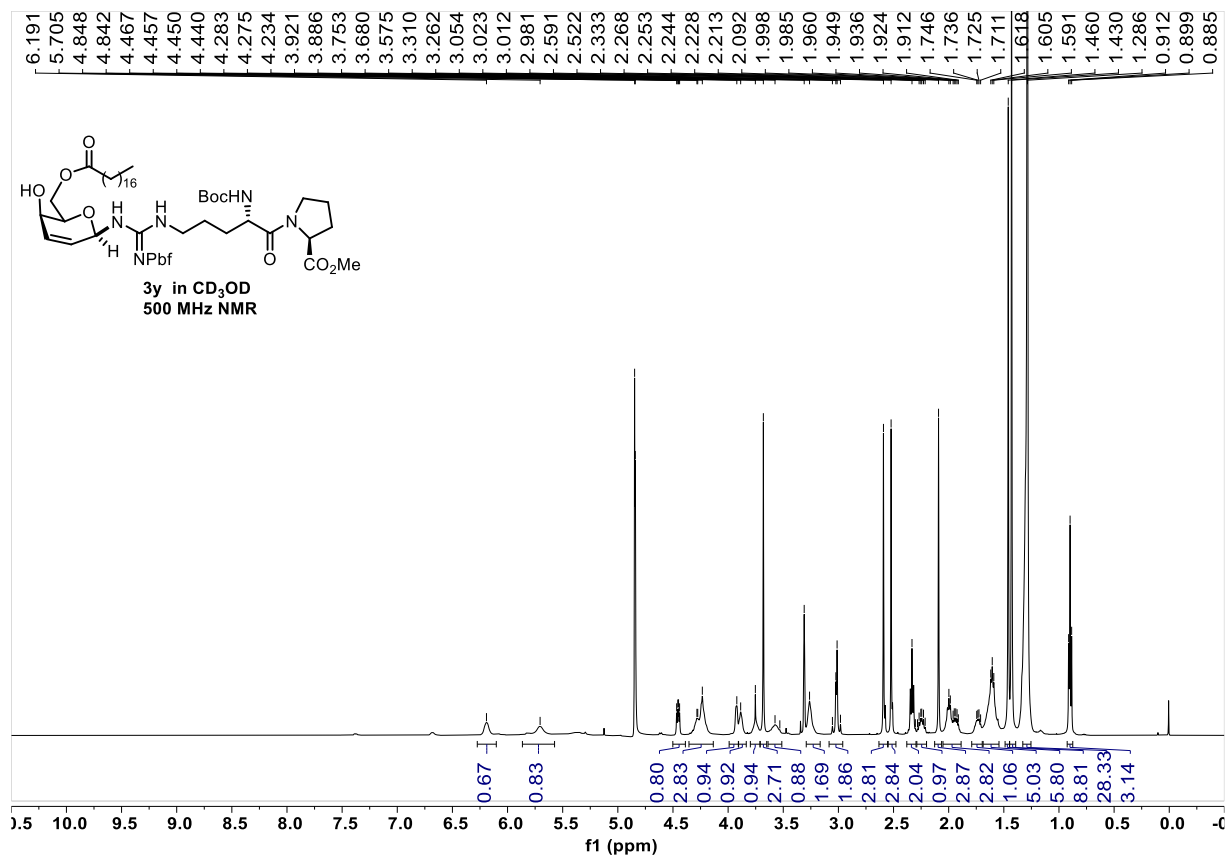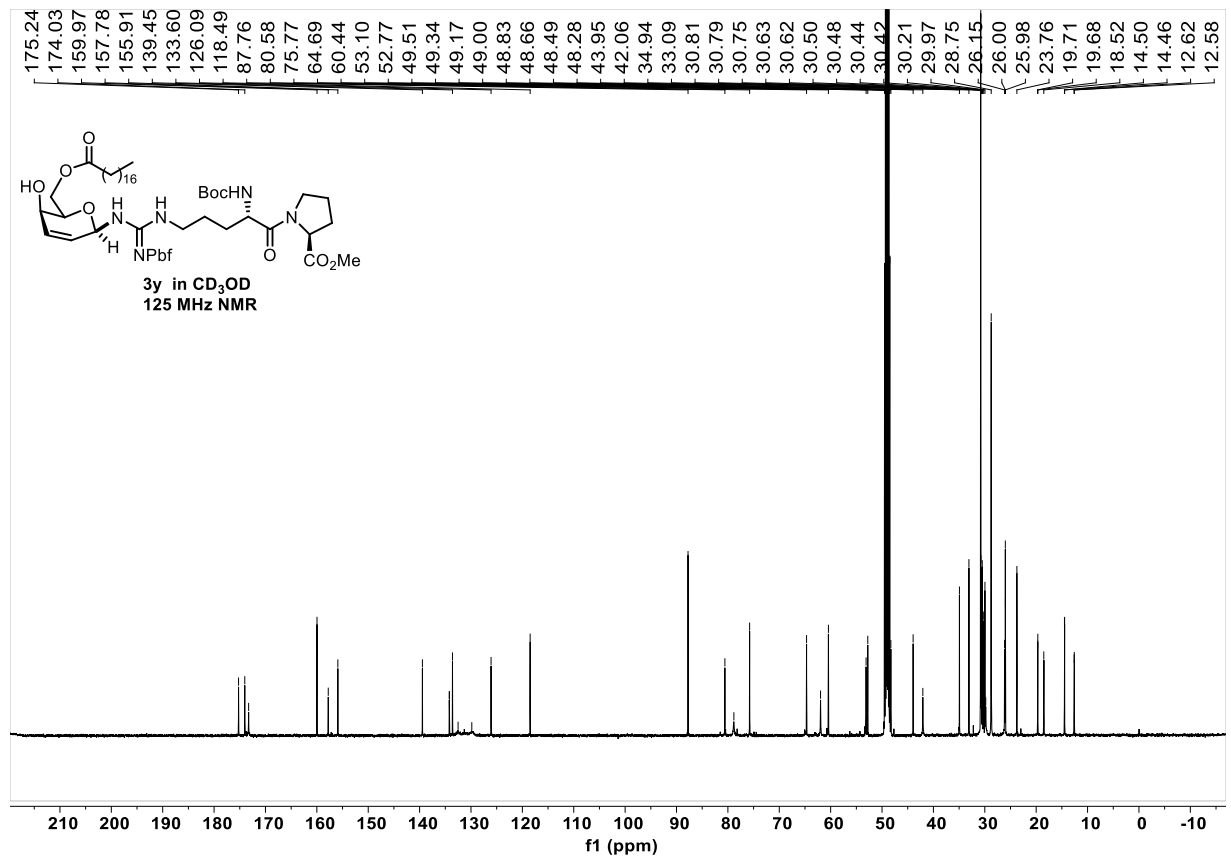

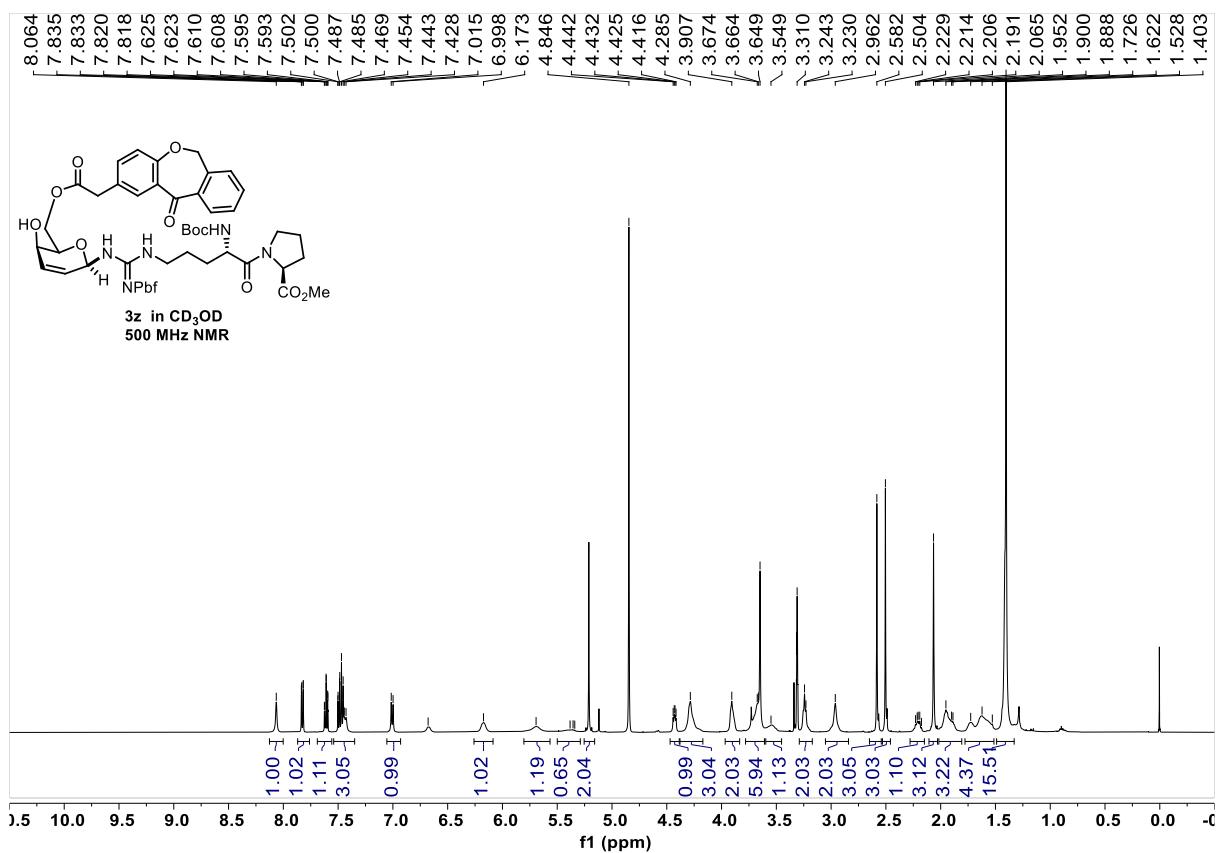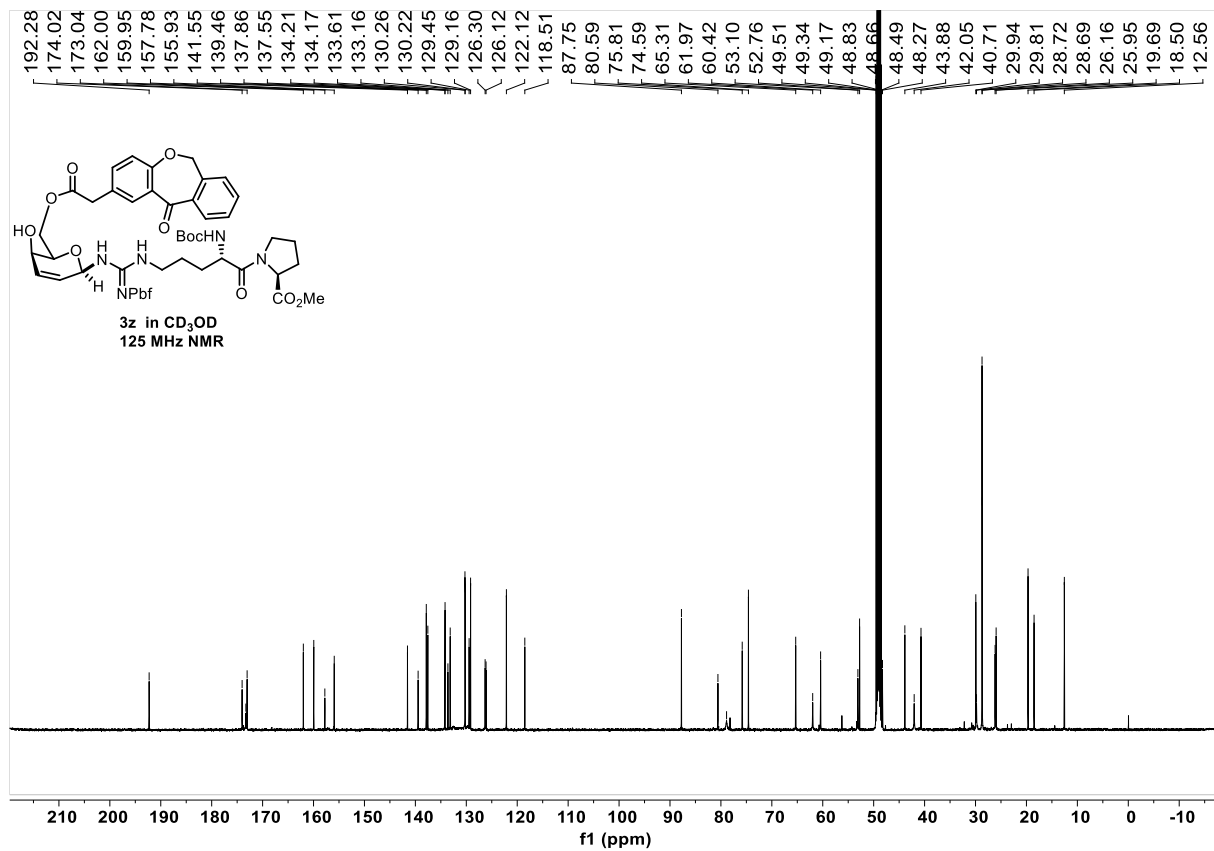

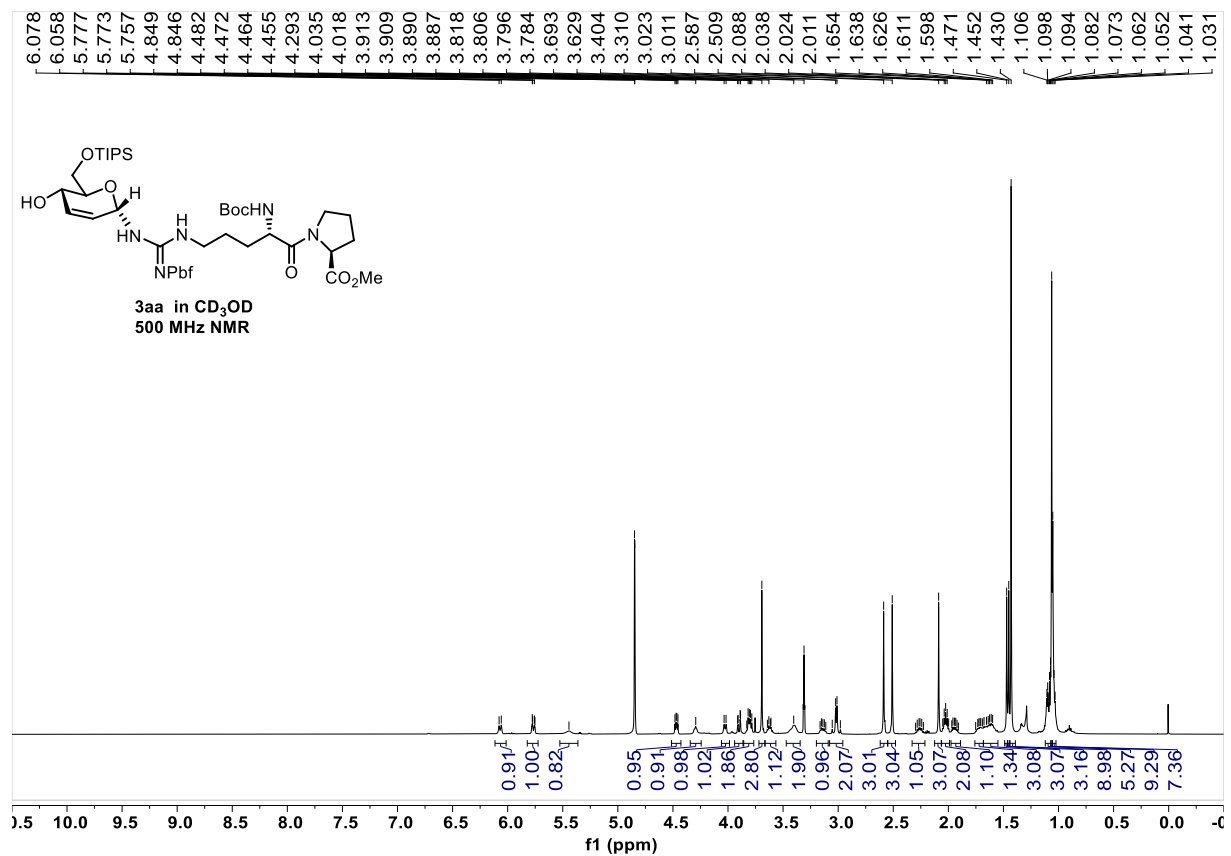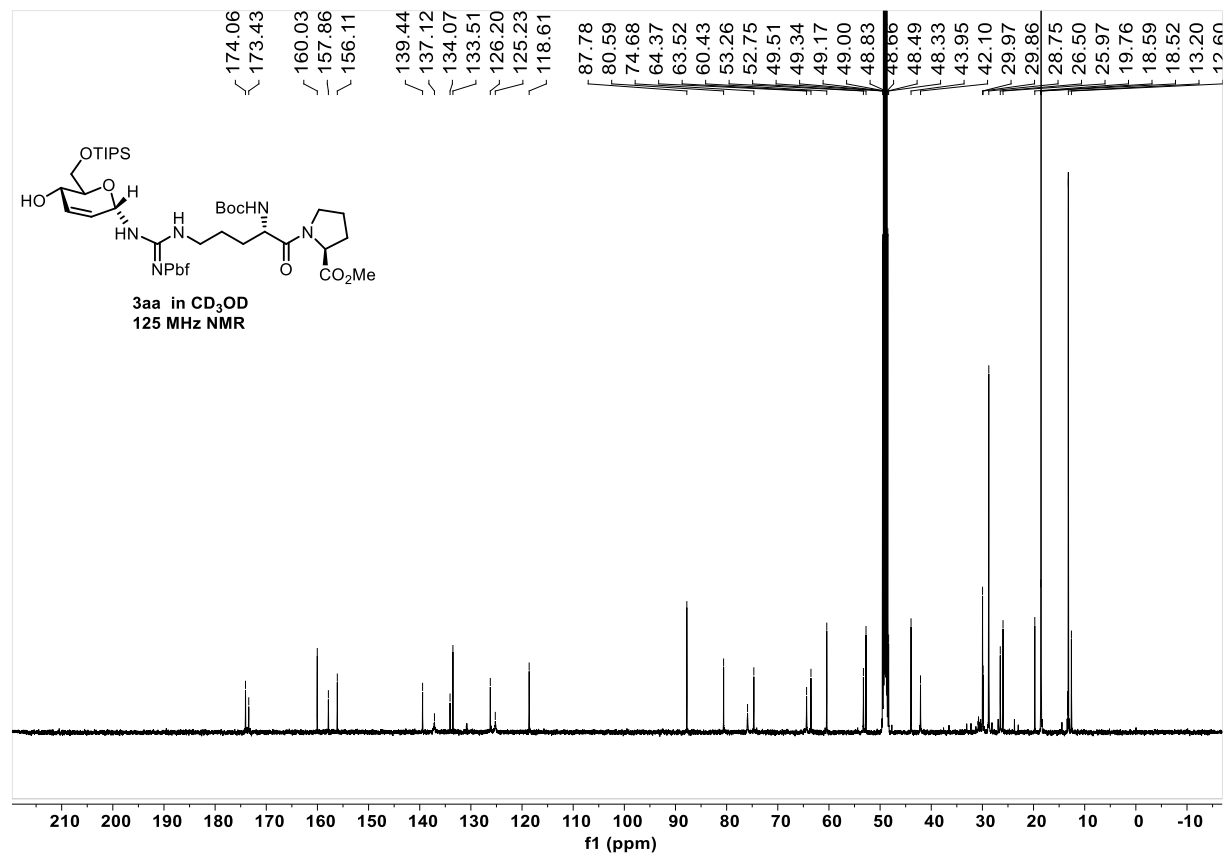

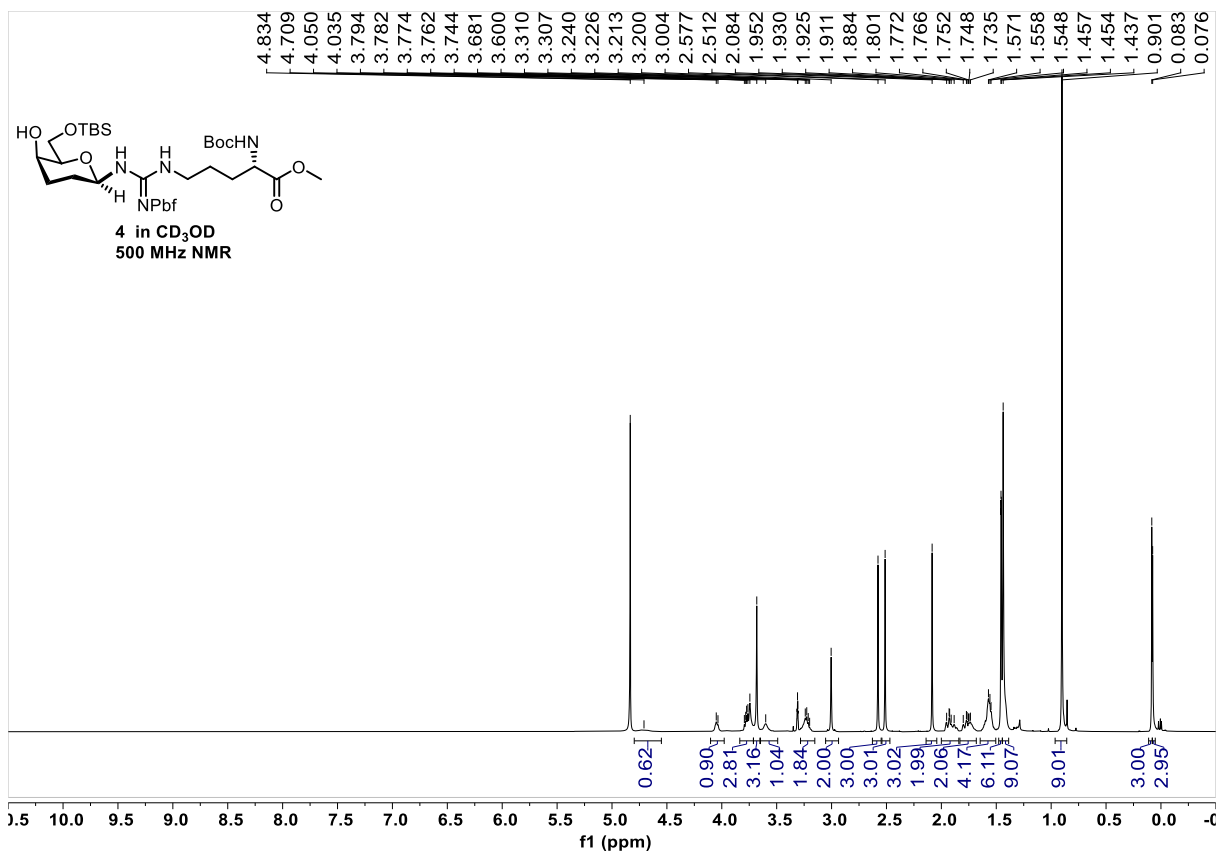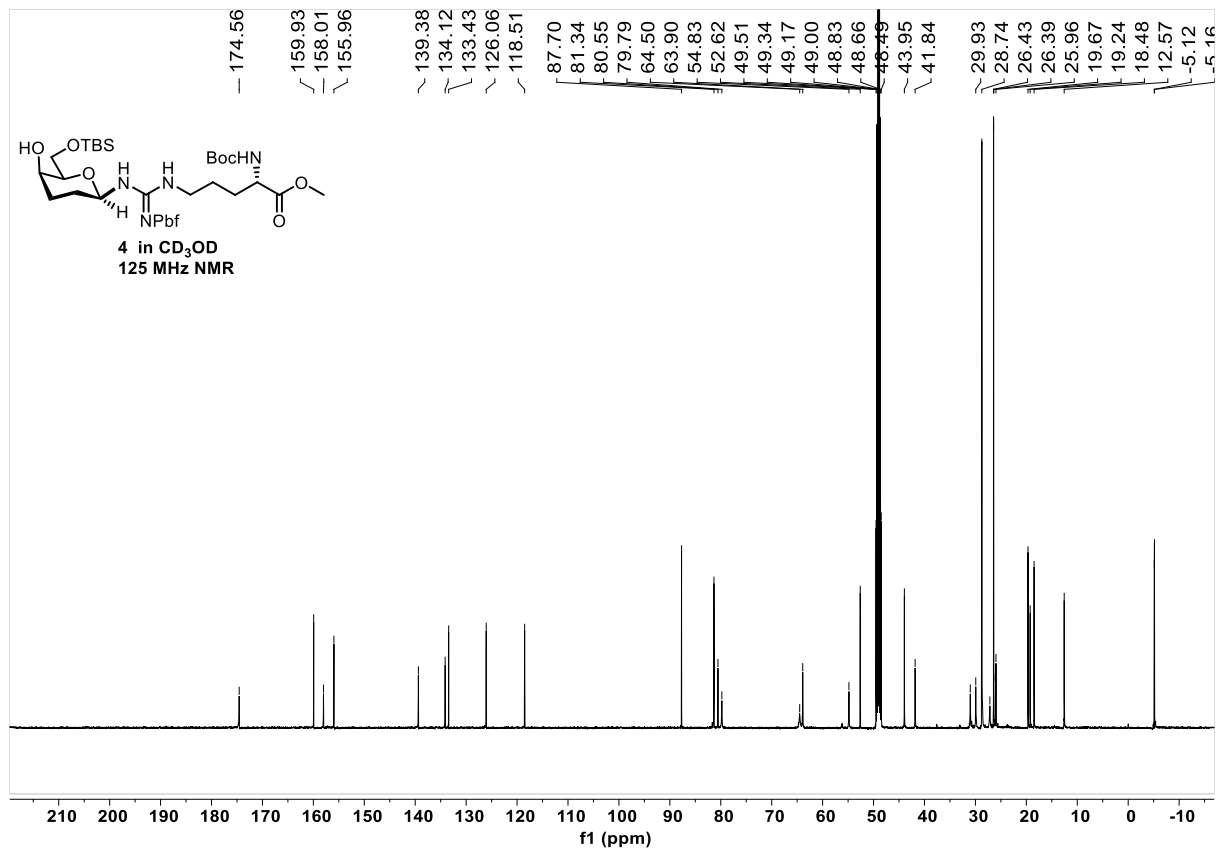

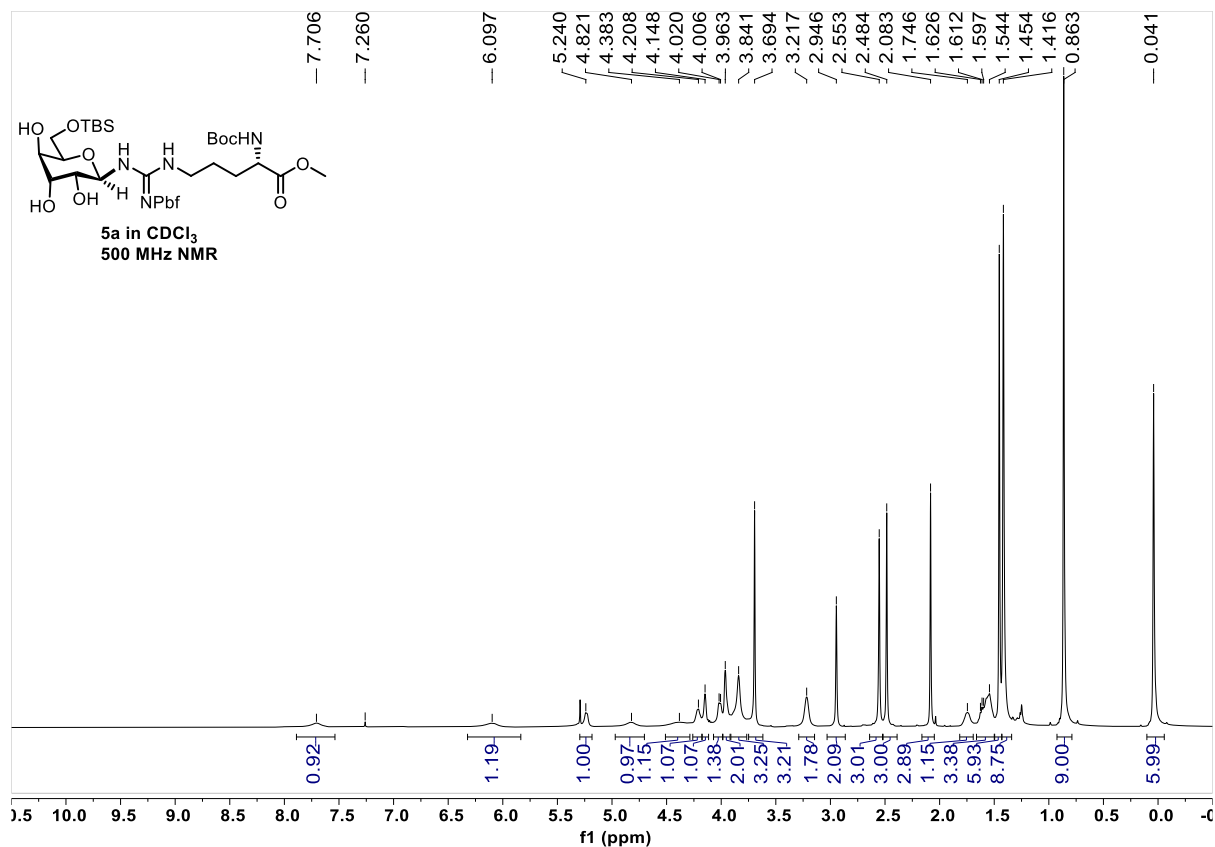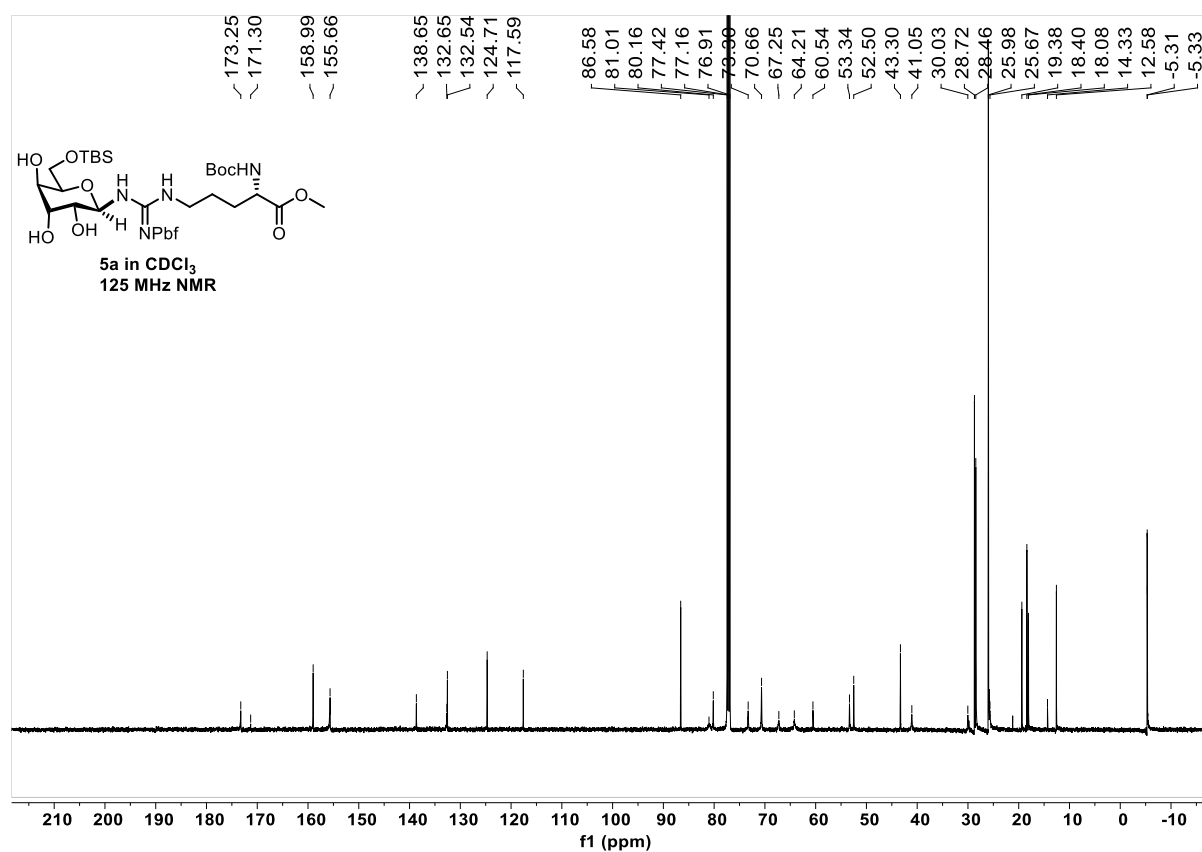

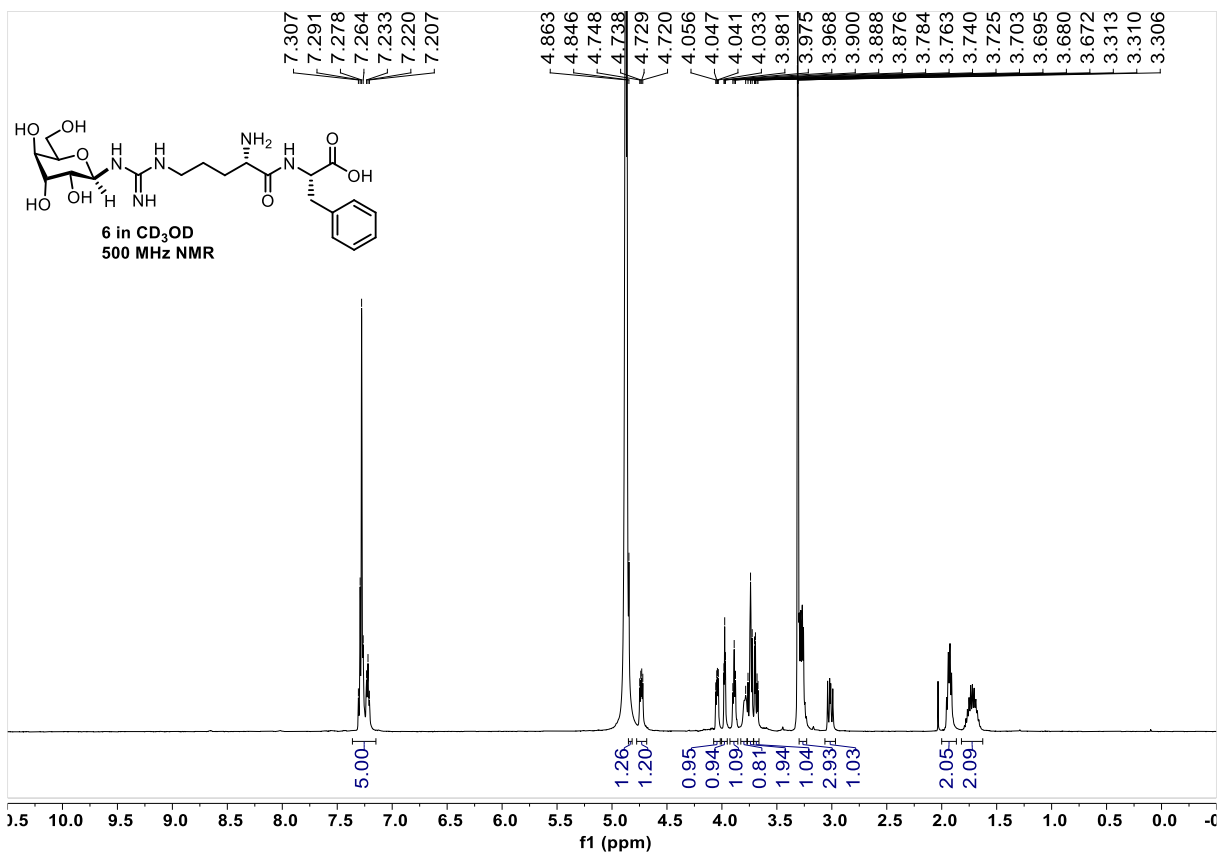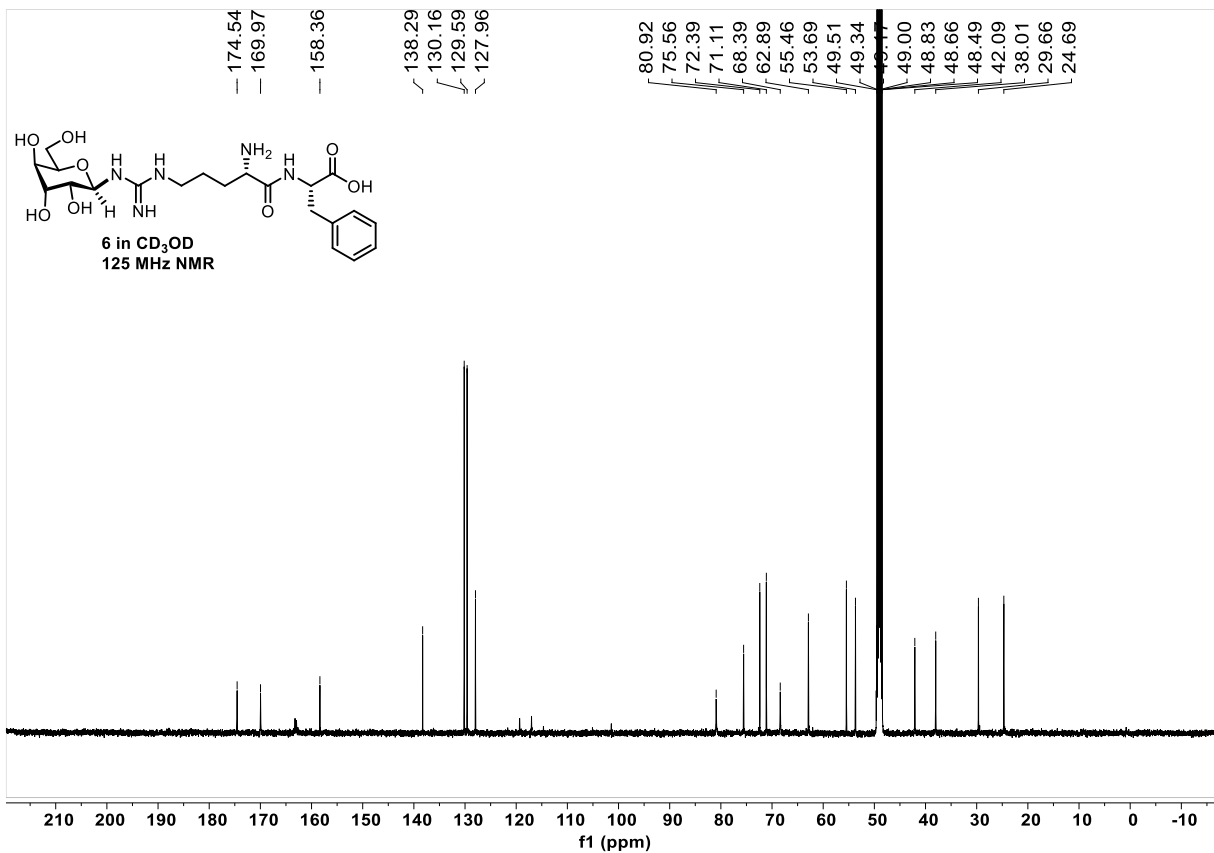

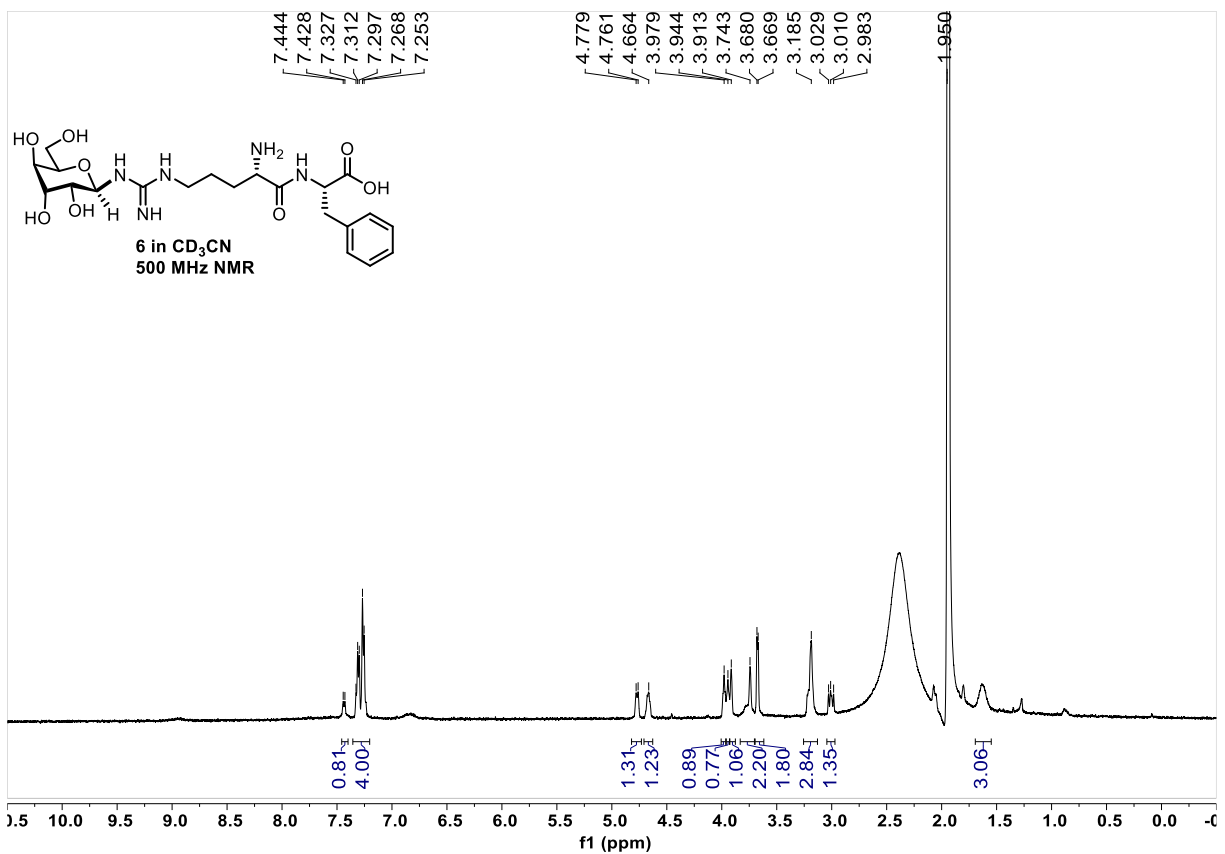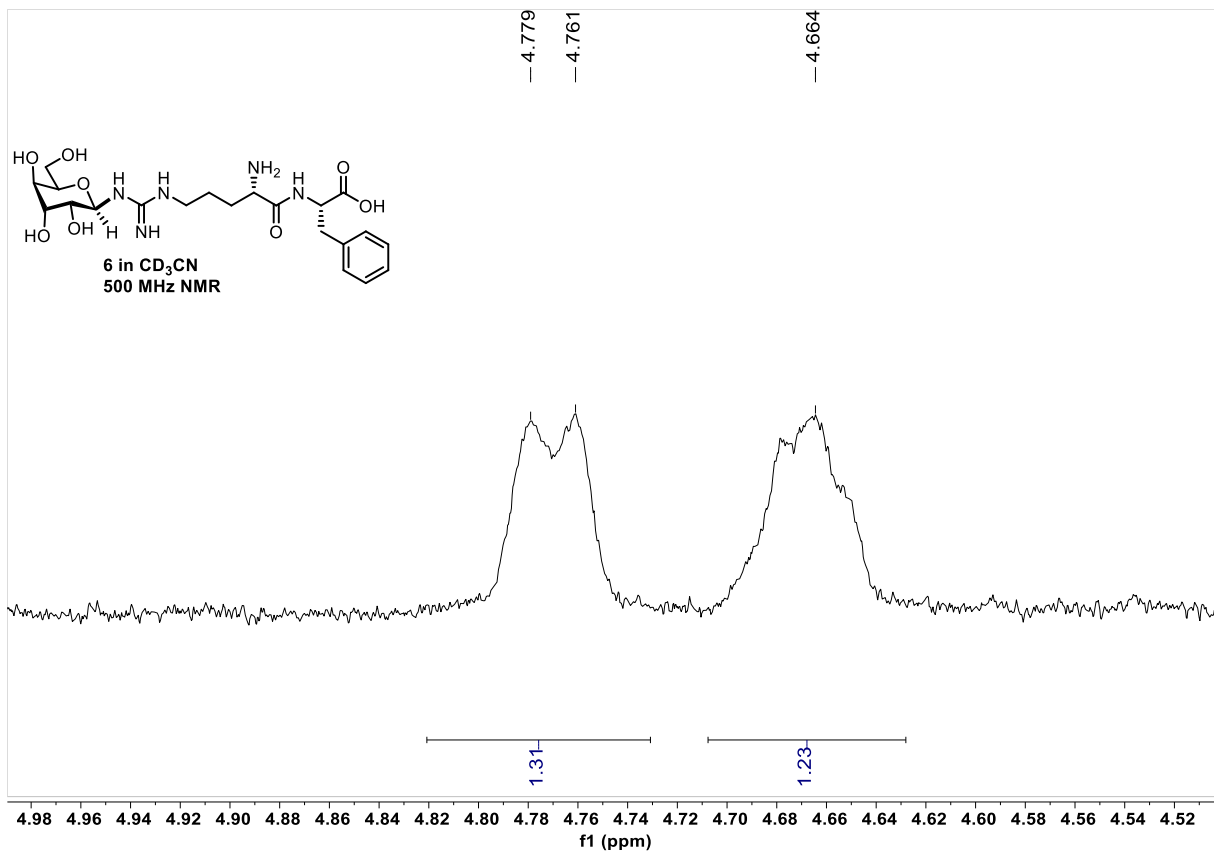

## 5 2D NMR Spectra for compound 3a

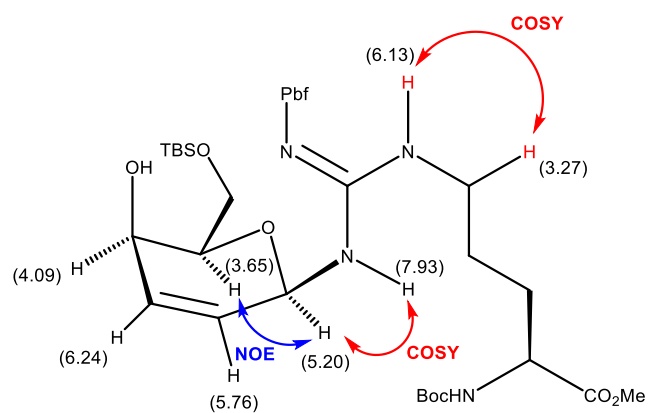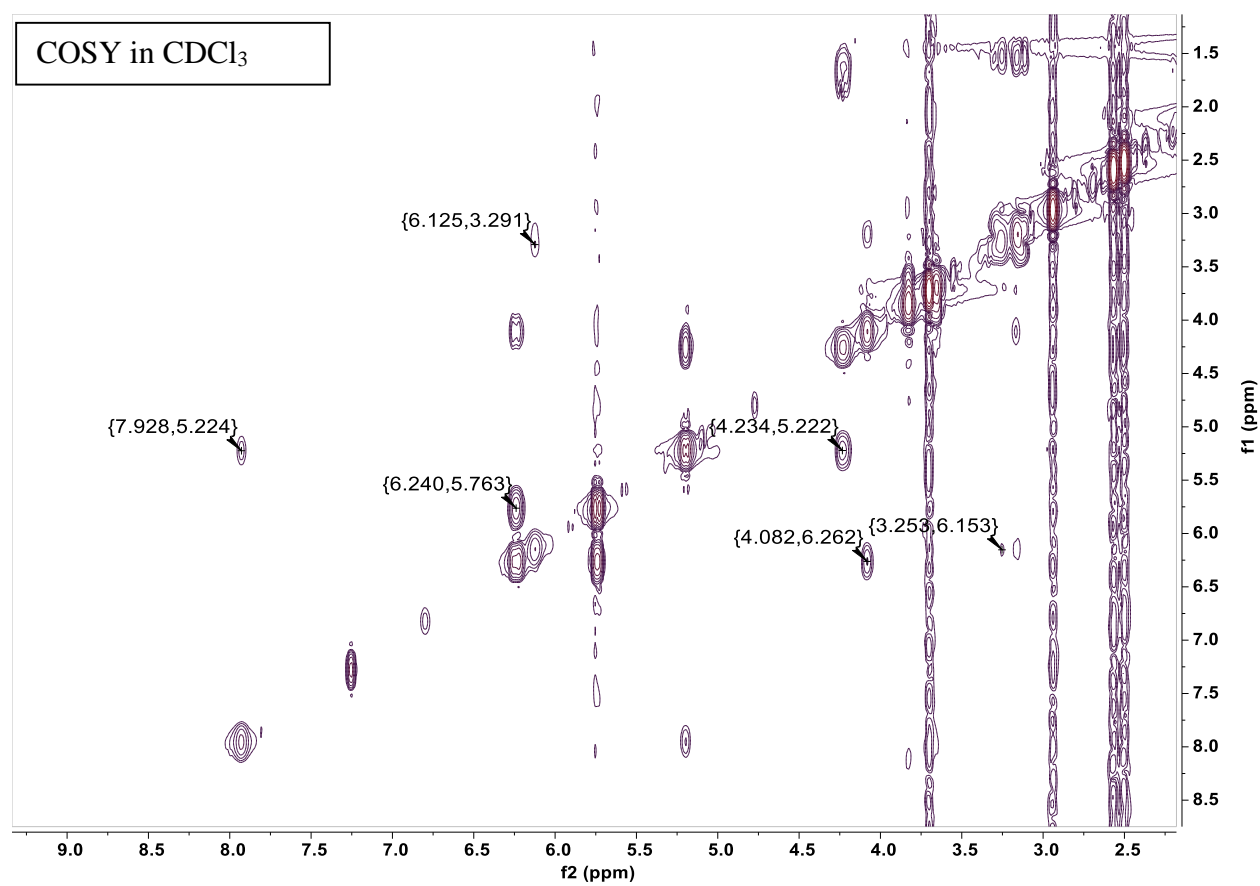

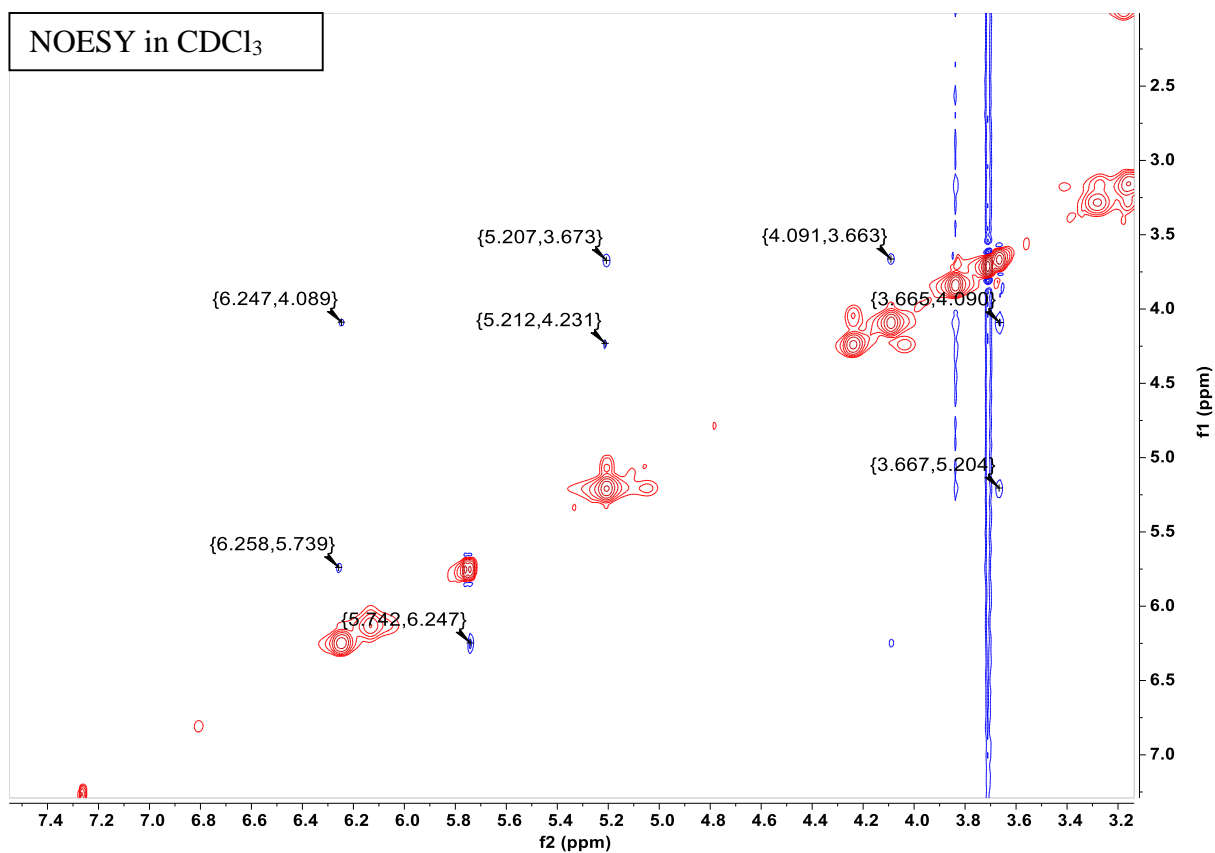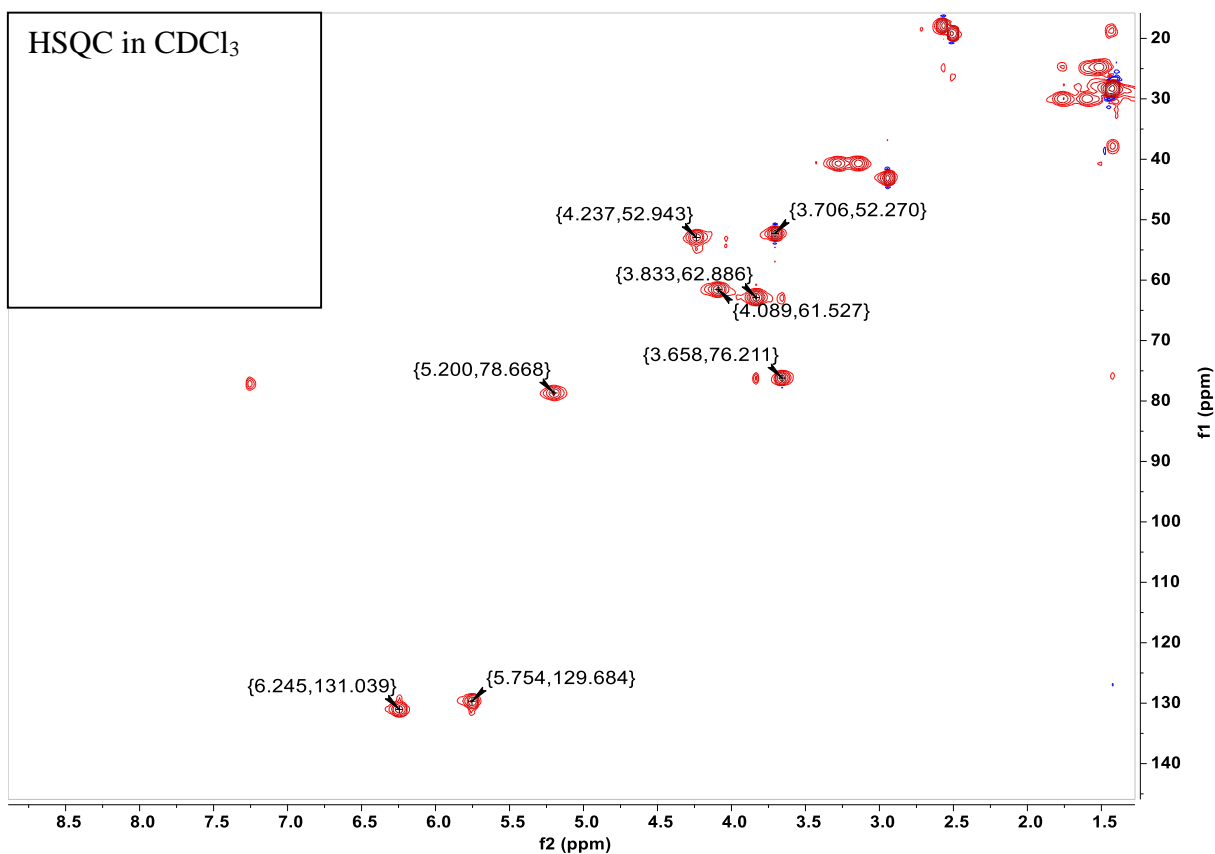

## 6 2D NMR Spectra for compound 6

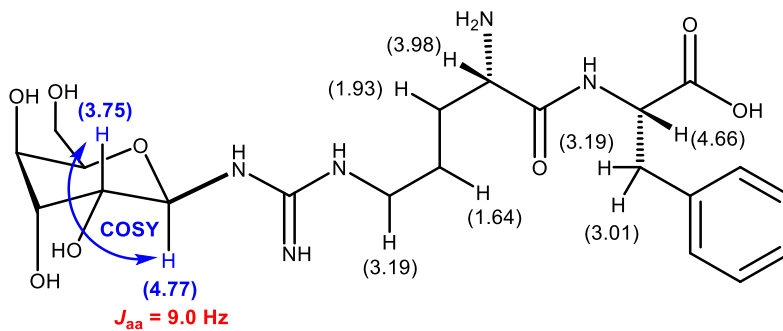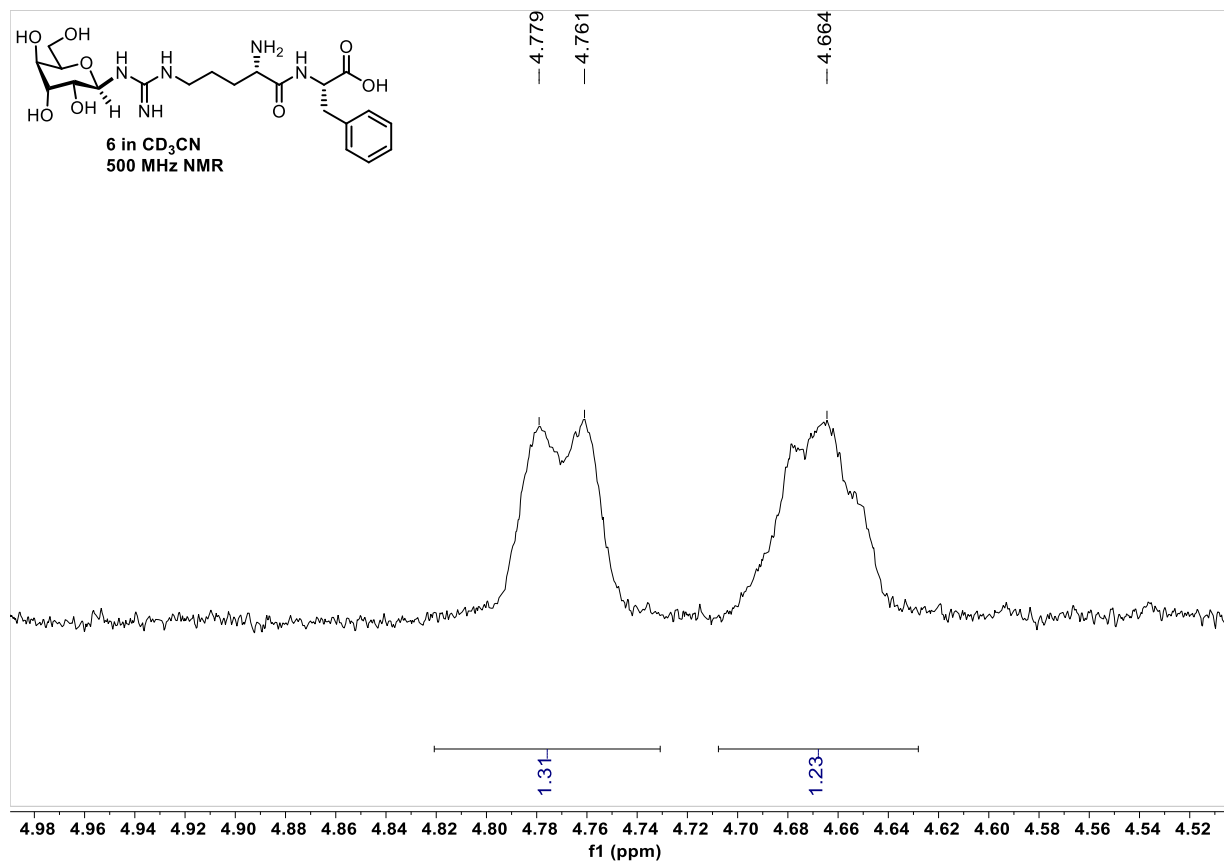

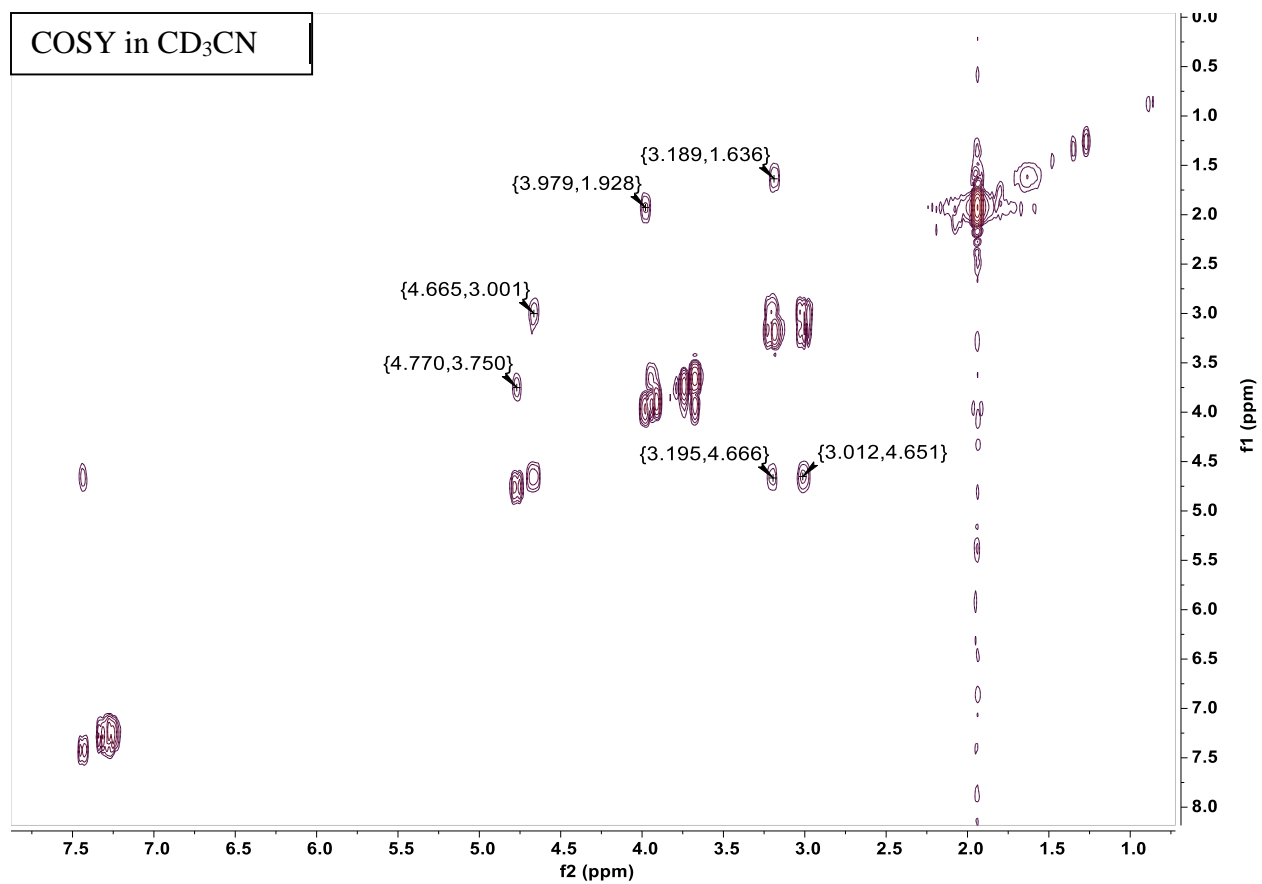

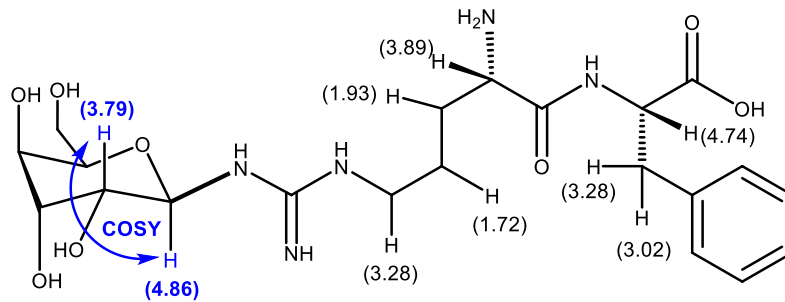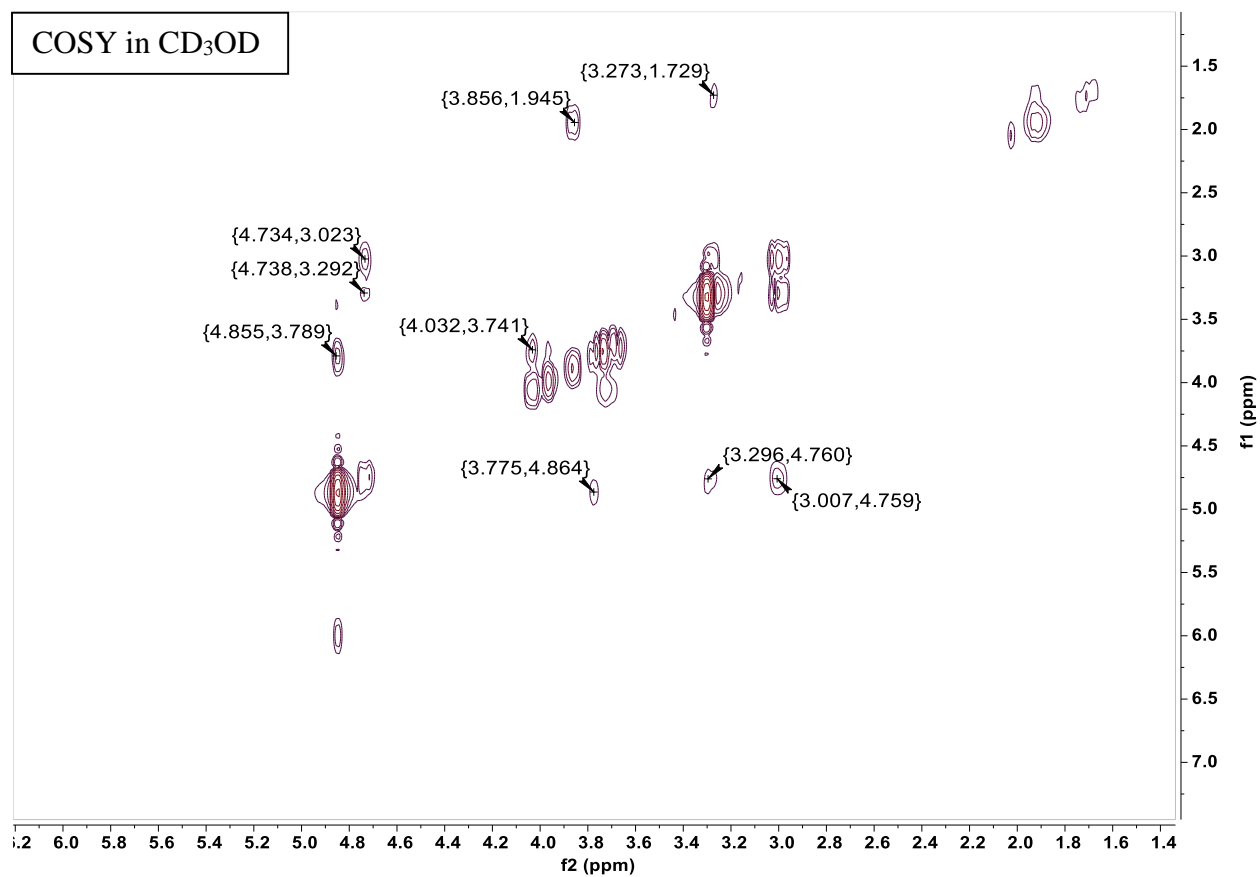

## 7 HPLC for compound 6

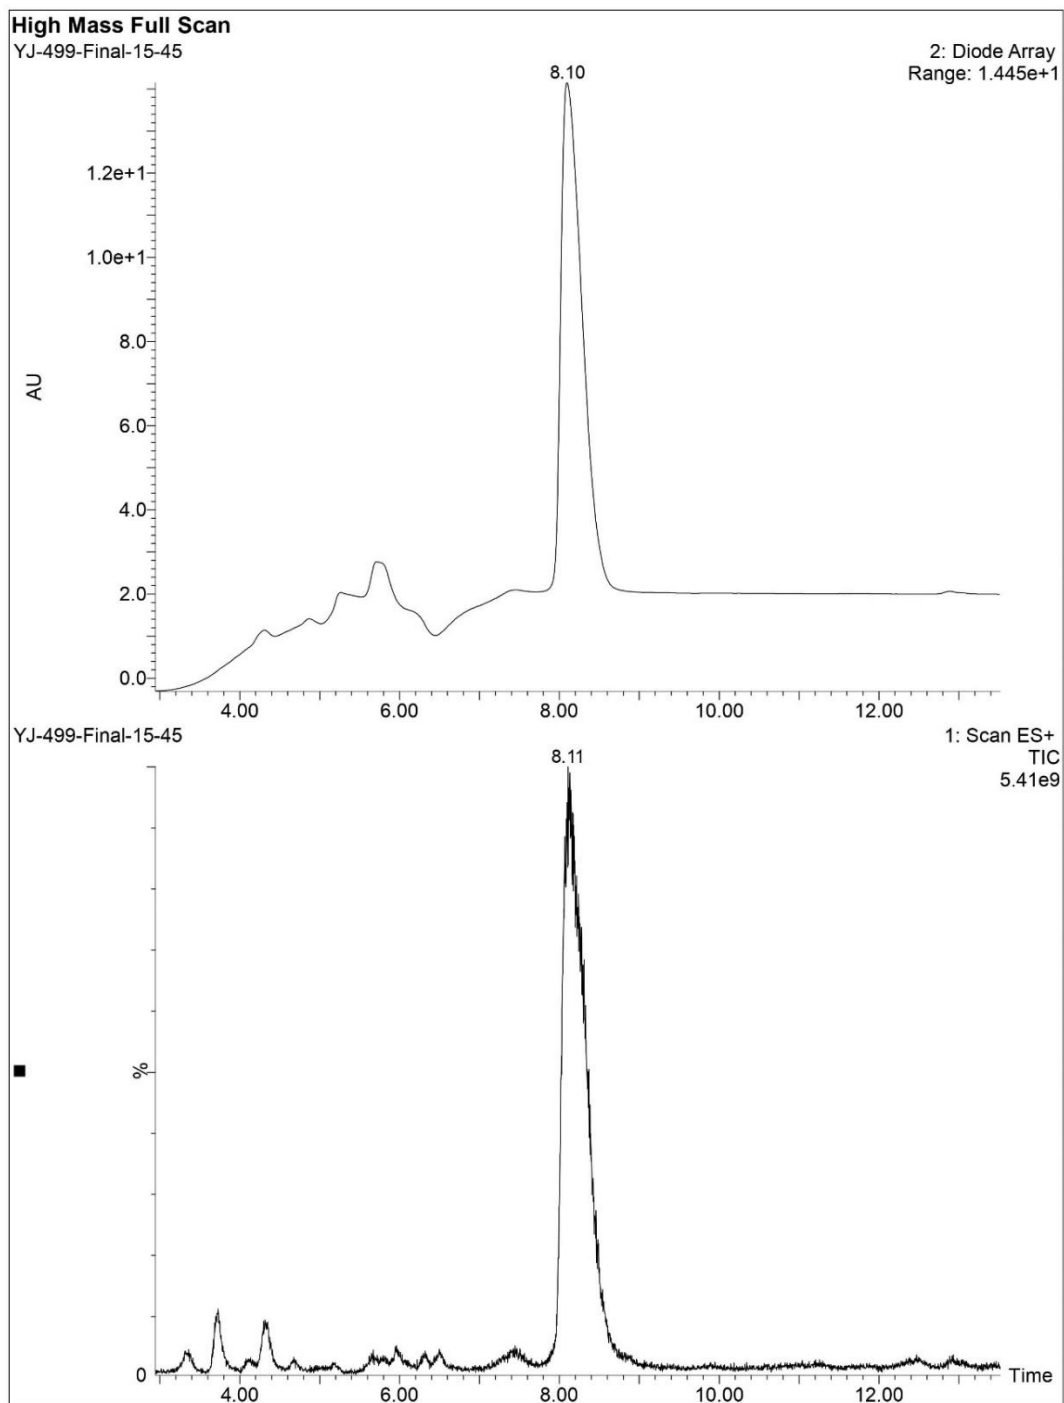

Supplement: NIHMS1704325-supplement-SI.pdf [file NIHMS1704325-supplement-SI.pdf]
